# Supplementary material for: A comprehensive, cell specific microRNA catalogue of human peripheral blood
Source: Oxford University Press journal article supplement (doi:10.1093/nar/gkx706), 2017-08-04
Supplement: gkx706_supp.zip [file gkx706_supp.zip]

Archive with 3 entries (3 files):
- nar-00173-z-2017-File008.pdf
- nar-00173-z-2017-File009.xlsx
- nar-00173-z-2017-File010.pdf
