# Supplementary material for: A comprehensive, cell specific microRNA catalogue of human peripheral blood
Source: Oxford University Press journal article supplement (doi:10.1093/nar/gkx706), 2017-08-04
Supplement: gkx706_supp.zip [file gkx706_supp.zip › nar-00173-z-2017-File009.xlsx]

## Sheet: Supplementary Table S1
Supplementary Table S1. Sequencing and mapping statistics of small RNA-seq libraries. Mapping efficiency = (reads mapped to calibrators + reads mapped to known miRNAs)/filered reads*100.
Sample GEO ID	Individual ID	Initial reads	Pre-processed reads	Filtered reads	Reads mapped to calibrators	Reads mapped to known miRNAs	Mapping efficiency (%)	Proportion of reads mapped to precursor and mature sequences (%)
Sample_0001_CD4	Sample_0001	3173870	2680968	1888758	0	1546155	81.86	99.93
Sample_0001_CD8	Sample_0001	1362832	1235309	1117039	374424	247547	55.68	99.94
Sample_0001_CD14	Sample_0001	830308	734950	679365	283731	246228	78.01	99.9
Sample_0001_CD15	Sample_0001	2234738	2134449	2133830	545342	1589	25.63	100
Sample_0001_CD19	Sample_0001	1369562	1189325	1029465	743480	181712	89.87	99.9
Sample_0001_CD56	Sample_0001	4749515	3195269	2807830	792490	1244038	72.53	99.9
Sample_0002_CD4	Sample_0002	2547014	2188854	1845462	897916	700452	86.61	99.93
Sample_0002_CD8	Sample_0002	2435623	2267847	2158101	755358	239799	46.11	99.96
Sample_0002_CD14	Sample_0002	1910166	1573067	1355816	554440	648038	88.69	99.95
Sample_0002_CD15	Sample_0002	797836	753740	753499	484298	498	64.34	100
Sample_0002_CD19	Sample_0002	1233212	1120584	1082472	813989	55592	80.33	99.87
Sample_0002_CD56	Sample_0002	3162265	2555699	2449099	753717	478249	50.3	99.92
Sample_0002_CD235a	Sample_0002	3204336	3104243	3099744	466360	968584	46.29	99.99
Sample_0003_CD4	Sample_0003	877108	797836	744735	520743	107066	84.3	99.96
Sample_0003_CD8	Sample_0003	1531389	1429156	1391688	1250490	37427	92.54	99.92
Sample_0003_CD14	Sample_0003	6058996	5364190	4691811	856614	1230386	44.48	99.9
Sample_0003_CD15	Sample_0003	947791	890278	890095	440247	206	49.48	100
Sample_0003_CD19	Sample_0003	3509907	3292769	3093914	1009285	261950	41.09	99.86
Sample_0003_CD56	Sample_0003	3138913	2682843	2313382	850503	1053009	82.28	99.94
Sample_0003_CD235a	Sample_0003	628167	584458	584249	378787	31589	70.24	99.99
Sample_0004_CD4	Sample_0004	3391642	2785939	1781850	0	1486094	83.4	99.95
Sample_0004_CD8	Sample_0004	1770395	1569672	1426743	914878	162140	75.49	99.94
Sample_0004_CD14	Sample_0004	4448397	3862308	2456942	1002185	1144381	87.37	99.87
Sample_0004_CD15	Sample_0004	3784304	3606849	3577420	1088943	42401	31.62	99.93
Sample_0004_CD19	Sample_0004	2737783	1643609	923560	0	615144	66.61	99.88
Sample_0004_CD56	Sample_0004	6893642	5375191	3778264	1061008	1763685	74.76	99.92
Sample_0004_CD235a	Sample_0004	861622	825621	825320	362327	17853	46.06	99.96
Sample_0005_CD4	Sample_0005	1637880	1408879	1213524	747502	200713	78.14	99.96
Sample_0005_CD8	Sample_0005	1295350	1134509	1013713	575844	136058	70.23	99.94
Sample_0005_CD14	Sample_0005	1439720	1277067	1009370	343222	364214	70.09	99.92
Sample_0005_CD15	Sample_0005	1228310	1095259	1074574	617575	13092	58.69	99.85
Sample_0005_CD19	Sample_0005	998074	830083	637495	338086	148334	76.3	99.9
Sample_0005_CD56	Sample_0005	1100200	1018462	1000893	675381	8492	68.33	99.78
Sample_0005_CD235a	Sample_0005	808434	770014	765171	541990	38957	75.92	99.91
Sample_0006_CD4	Sample_0006	1025330	879060	741923	422118	154752	77.75	99.95
Sample_0006_CD8	Sample_0006	609167	588520	581724	438262	2196	75.72	99.83
Sample_0006_CD14	Sample_0006	1700352	1523610	999687	370792	408116	77.92	99.93
Sample_0006_CD15	Sample_0006	912286	788756	767599	483178	15936	65.02	99.84
Sample_0006_CD19	Sample_0006	1470231	1231590	953486	492381	195545	72.15	99.87
Sample_0006_CD56	Sample_0006	1193626	1104920	1094146	803345	6121	73.98	99.96
Sample_0006_CD235a	Sample_0006	838868	796922	788016	595552	38874	80.51	99.97
Sample_0007_CD4	Sample_0007	1877118	1582250	1171358	490287	350238	71.76	99.9
Sample_0007_CD8	Sample_0007	1743287	1495082	1173955	607177	235151	71.75	99.93
Sample_0007_CD14	Sample_0007	3296867	2634234	2136987	0	769633	36.01	99.89
Sample_0007_CD15	Sample_0007	1926620	1689974	1663226	736663	39100	46.64	99.94
Sample_0007_CD19	Sample_0007	3662558	2727064	2019410	0	872920	43.23	99.9
Sample_0007_CD56	Sample_0007	1164128	1063218	1003087	539816	130182	66.79	99.94
Sample_0007_CD235a	Sample_0007	10300082	9192270	8834796	625749	104506	8.27	99.95
Sample_0008_CD4	Sample_0008	3671591	3093158	2049091	734856	916407	80.59	99.88
Sample_0008_CD8	Sample_0008	2650204	2283858	1393550	412764	756159	83.88	99.9
Sample_0008_CD14	Sample_0008	3441495	3085312	2232410	495303	1431133	86.29	99.88
Sample_0008_CD15	Sample_0008	1919022	1821974	1773711	1171575	56402	69.23	99.83
Sample_0008_CD19	Sample_0008	2145103	1794570	1157128	480048	500602	84.75	99.91
Sample_0008_CD56	Sample_0008	3692970	3147905	2310994	626432	1254555	81.39	99.89
Sample_0008_CD235a	Sample_0008	2076234	2000532	2000092	1165537	5369	58.54	99.55
Sample_0009_CD4	Sample_0009	2001067	1845969	1585432	949020	238021	74.87	99.85
Sample_0009_CD8	Sample_0009	2753372	2534596	2278894	1167157	182845	59.24	99.82
Sample_0009_CD14	Sample_0009	3475202	3151073	2178303	1048411	790883	84.44	99.84
Sample_0009_CD15	Sample_0009	1244527	1191802	1161517	1041817	23310	91.7	99.82
Sample_0009_CD19	Sample_0009	3179029	2872325	2497399	1126918	233798	54.49	99.83
Sample_0009_CD56	Sample_0009	1927537	1713545	1563913	843148	185018	65.74	99.81
Sample_0009_CD235a	Sample_0009	1277619	1238800	1237885	1088333	39669	91.12	99.91
Sample_0010_CD4	Sample_0010	3005507	2779462	1672407	729163	734125	87.5	99.94
Sample_0010_CD8	Sample_0010	2340952	2106750	1436446	790813	506784	90.33	99.95
Sample_0010_CD14	Sample_0010	7215933	6558292	4676504	1010747	2758071	80.59	99.9
Sample_0010_CD15	Sample_0010	2678145	2534644	2429596	1358987	86343	59.49	99.88
Sample_0010_CD19	Sample_0010	5696042	4958038	3670079	1338695	1273921	71.19	99.88
Sample_0010_CD56	Sample_0010	7981707	7234911	3987558	1087726	2286598	84.62	99.92
Sample_0010_CD235a	Sample_0010	1790048	1724820	1724504	1411126	5607	82.15	99.21
Sample_0011_CD4	Sample_0011	2348989	2201399	1597753	1071234	390300	91.47	99.94
Sample_0011_CD8	Sample_0011	1960455	1857806	1411160	1100997	115200	86.18	99.9
Sample_0011_CD14	Sample_0011	8462900	7450539	5428707	1198931	3460574	85.83	99.92
Sample_0011_CD15	Sample_0011	1772814	1672185	1539313	1127310	230230	88.19	99.96
Sample_0011_CD19	Sample_0011	2922605	2806859	2761889	1464861	34307	54.28	99.78
Sample_0011_CD56	Sample_0011	2155560	1985098	1522852	895022	507814	92.12	99.93
Sample_0011_CD235a	Sample_0011	3021864	2928106	2926743	1614917	45715	56.74	99.9
Sample_0012_CD4	Sample_0012	4492765	4157280	2981495	1848524	754922	87.32	99.93
Sample_0012_CD8	Sample_0012	4454967	4106170	3127472	1711017	579816	73.25	99.89
Sample_0012_CD14	Sample_0012	7389719	6951491	3651325	1701338	924239	71.91	99.85
Sample_0012_CD15	Sample_0012	2520936	2414275	2403650	1746906	15130	73.31	99.75
Sample_0012_CD19	Sample_0012	3552165	3277534	2839240	1856662	329112	76.98	99.87
Sample_0012_CD56	Sample_0012	5521004	4746208	4046625	1947072	899810	70.35	99.88
Sample_0012_CD235a	Sample_0012	3554511	3366398	3363837	2256583	79429	69.44	99.95
Sample_0013_CD4	Sample_0013	7417867	6950041	4358163	1102974	2233947	76.57	99.96
Sample_0013_CD8	Sample_0013	4637050	4358981	2756528	1535798	527153	74.84	99.94
Sample_0013_CD14	Sample_0013	1273557	1019776	754182	0	614941	81.54	99.92
Sample_0013_CD15	Sample_0013	2984106	2843918	2793897	1961627	70245	72.73	99.94
Sample_0013_CD19	Sample_0013	3319810	3088226	2799057	1816524	326857	76.58	99.91
Sample_0013_CD56	Sample_0013	9756787	9000238	5014391	1639255	2231285	77.19	99.93
Sample_0013_CD235a	Sample_0013	3646607	3500416	3496308	2475259	173366	75.75	99.96
Sample_0014_CD4	Sample_0014	13922156	12778915	6896095	1482730	3713110	75.34	99.94
Sample_0014_CD8	Sample_0014	4996373	4722683	2814458	1390135	497835	67.08	99.94
Sample_0014_CD14	Sample_0014	10411458	9540013	5534428	1538570	3034789	82.63	99.92
Sample_0014_CD15	Sample_0014	3724620	3506012	3357384	2269450	203411	73.65	99.95
Sample_0014_CD19	Sample_0014	4055272	3702277	3178163	2162153	450998	82.22	99.88
Sample_0014_CD56	Sample_0014	5881916	5509898	3662071	1805913	914141	74.28	99.93
Sample_0014_CD235a	Sample_0014	3351764	3205551	3202597	2309022	213381	78.76	99.96
Sample_0015_CD4	Sample_0015	23823099	22363729	6677987	1463967	3690124	77.18	99.94
Sample_0015_CD8	Sample_0015	5726309	5469539	2354705	1238495	630448	79.37	99.95
Sample_0015_CD14	Sample_0015	9879943	9144409	5739148	1533905	3166774	81.91	99.89
Sample_0015_CD15	Sample_0015	1710039	1661690	1380574	1012298	212823	88.74	99.94
Sample_0015_CD19	Sample_0015	3844579	3536426	2882890	1658387	563595	77.07	99.9
Sample_0015_CD56	Sample_0015	11558251	11107163	3201449	1229660	1297715	78.94	99.95
Sample_0015_CD235a	Sample_0015	1933432	1892188	1889195	1225403	189062	74.87	99.97
Sample_0016_CD4	Sample_0016	3186885	2720171	2089871	0	1798215	86.04	99.93
Sample_0016_CD8	Sample_0016	4301909	4080556	3185950	1741749	1045833	87.5	99.93
Sample_0016_CD14	Sample_0016	4375111	4162812	3604904	1877396	1290935	87.89	99.9
Sample_0016_CD15	Sample_0016	2571538	2505447	2390221	1860053	160798	84.55	99.95
Sample_0016_CD19	Sample_0016	3180472	3032824	2603638	1736202	368086	80.82	99.89
Sample_0016_CD56	Sample_0016	4450704	4101746	3461621	1176335	1864439	87.84	99.93
Sample_0016_CD235a	Sample_0016	1731866	1702745	1701145	1527331	103130	95.84	99.96
Sample_0017_CD4	Sample_0017	6843191	6531442	4895807	1743230	2738899	91.55	99.96
Sample_0017_CD8	Sample_0017	4267384	4040832	3232879	1746109	1164356	90.03	99.95
Sample_0017_CD14	Sample_0017	5240178	4954979	3950062	1867847	1579571	87.28	99.89
Sample_0017_CD15	Sample_0017	2699444	2633943	2562539	2218852	111821	90.95	99.94
Sample_0017_CD19	Sample_0017	3777890	3557919	2896033	1861739	625463	85.88	99.9
Sample_0017_CD56	Sample_0017	2718885	2578140	2357032	1623240	572559	93.16	99.93
Sample_0017_CD235a	Sample_0017	3470944	3401915	3395025	2889702	328370	94.79	99.95
Sample_0018_CD4	Sample_0018	6731714	6438310	4551903	2101513	1369316	76.25	99.94
Sample_0018_CD8	Sample_0018	7544662	7349180	3214919	2426158	407775	88.15	99.9
Sample_0018_CD14	Sample_0018	3977893	3806913	2851000	1768500	610549	83.45	99.87
Sample_0018_CD15	Sample_0018	2187486	2136464	2081573	1698397	80321	85.45	99.95
Sample_0018_CD19	Sample_0018	1979569	1914768	1620078	1280185	121840	86.54	99.84
Sample_0018_CD56	Sample_0018	12703920	12207405	4998017	2184664	1970957	83.15	99.89
Sample_0018_CD235a	Sample_0018	2600893	2553426	2550427	2134681	130688	88.82	99.94
Sample_0019_CD4	Sample_0019	4076521	3909721	2593126	906227	1366670	87.65	99.95
Sample_0019_CD8	Sample_0019	10075436	9583269	4690760	1523976	2235226	80.14	99.91
Sample_0019_CD14	Sample_0019	2920223	2431859	1782586	0	1384903	77.69	99.9
Sample_0019_CD15	Sample_0019	1616616	1576226	1570118	1262280	9351	80.99	99.92
Sample_0019_CD19	Sample_0019	2754385	2507545	2089726	1205325	275859	70.88	99.89
Sample_0019_CD56	Sample_0019	9159543	8346571	5230007	1502365	2617966	78.78	99.92
Sample_0019_CD235a	Sample_0019	1490589	1462729	1461136	986280	132598	76.58	99.93
Sample_0020_CD4	Sample_0020	2005605	1902863	1675524	1186002	295991	88.45	99.94
Sample_0020_CD8	Sample_0020	3640269	3351904	2732234	1433830	683553	77.5	99.95
Sample_0020_CD14	Sample_0020	3930246	3625290	2892475	1201032	1086805	79.1	99.89
Sample_0020_CD15	Sample_0020	2287967	2233782	2146599	1345209	74178	66.12	99.9
Sample_0020_CD19	Sample_0020	2125679	2017421	1843026	1267721	104360	74.45	99.87
Sample_0020_CD56	Sample_0020	2684553	2455055	2133189	1082225	528831	75.52	99.92
Sample_0020_CD235a	Sample_0020	1721543	1680564	1678617	1224473	130255	80.71	99.95
Sample_0021_CD4	Sample_0021	2405857	2079643	1207019	0	969172	80.29	99.94
Sample_0021_CD8	Sample_0021	5535173	5117034	2657283	1128023	894285	76.1	99.9
Sample_0021_CD14	Sample_0021	1174912	1006222	583800	0	469106	80.35	99.9
Sample_0021_CD15	Sample_0021	2318251	2247732	2129701	1385583	85312	69.07	99.9
Sample_0021_CD19	Sample_0021	3670154	3294459	2431732	1072222	576245	67.79	99.88
Sample_0021_CD56	Sample_0021	3813211	3628930	2465586	1156235	547751	69.11	99.89
Sample_0021_CD235a	Sample_0021	3128728	3052759	3048910	1973068	131046	69.01	99.98
Sample_0022_CD4	Sample_0022	4270650	3740822	2457058	0	2141779	87.17	99.96
Sample_0022_CD8	Sample_0022	4349108	4105861	2841947	1188407	736654	67.74	99.93
Sample_0022_CD14	Sample_0022	6031197	5570882	4043388	960215	2247165	79.32	99.89
Sample_0022_CD15	Sample_0022	1959064	1897018	1817971	1353600	69895	78.3	99.91
Sample_0022_CD19	Sample_0022	3036861	2766341	2188116	1191277	462690	75.59	99.89
Sample_0022_CD56	Sample_0022	4712401	4475199	3081197	1129190	1169002	74.59	99.93
Sample_0022_CD235a	Sample_0022	2040382	1996256	1994095	1356641	72602	71.67	99.95
Sample_0023_CD4	Sample_0023	5409650	4962637	3263274	1102720	1464730	78.68	99.95
Sample_0023_CD8	Sample_0023	4200633	3965063	2417612	1288835	524401	75	99.9
Sample_0023_CD14	Sample_0023	4753034	4124655	3488743	1567362	1429774	85.91	99.9
Sample_0023_CD15	Sample_0023	2372332	2225163	2187916	1989834	54727	93.45	99.88
Sample_0023_CD19	Sample_0023	2634819	2449319	2371219	1571440	78133	69.57	99.82
Sample_0023_CD56	Sample_0023	7347990	5427218	4336027	1231718	2631501	89.1	99.93
Sample_0023_CD235a	Sample_0023	1768512	1675223	1673953	1470418	117734	94.87	99.93
Sample_0024_CD4	Sample_0024	3032437	2626978	1459716	0	1199694	82.19	99.95
Sample_0024_CD8	Sample_0024	4581018	3953182	2543157	1240051	1033725	89.41	99.94
Sample_0024_CD14	Sample_0024	6983129	5934924	4918685	1169836	2489384	74.39	99.91
Sample_0024_CD15	Sample_0024	3670414	3367545	3242715	1803654	246621	63.23	99.94
Sample_0024_CD19	Sample_0024	5962750	5589818	5542093	2354737	53537	43.45	99.86
Sample_0024_CD56	Sample_0024	3523994	3067118	2378102	1036192	1149445	91.91	99.94
Sample_0024_CD235a	Sample_0024	4944185	4688245	4677584	2915285	528291	73.62	99.97
Sample_0025_CD4	Sample_0025	8311020	7046452	5852709	1442264	2944538	74.95	99.95
Sample_0025_CD8	Sample_0025	6802691	6046909	5341576	1513145	1675907	59.7	99.95
Sample_0025_CD14	Sample_0025	8082720	6650883	5789703	2090317	3090080	89.48	99.92
Sample_0025_CD15	Sample_0025	3040609	2784683	2695174	2079697	339664	89.77	99.94
Sample_0025_CD19	Sample_0025	8096229	6449905	5585187	2016721	1356364	60.39	99.92
Sample_0025_CD56	Sample_0025	6616652	5575717	4971407	2091230	2296135	88.25	99.95
Sample_0025_CD235a	Sample_0025	7347679	6985669	6979203	2886569	720286	51.68	99.97
Sample_0026_CD4	Sample_0026	6103620	5277920	3469751	1147601	1676741	81.4	99.95
Sample_0026_CD8	Sample_0026	7401906	6707144	5348967	1640323	801754	45.66	99.96
Sample_0026_CD14	Sample_0026	2953256	2533098	1877617	0	1508771	80.36	99.9
Sample_0026_CD15	Sample_0026	3286710	2977313	2843276	1577189	426799	70.48	99.95
Sample_0026_CD19	Sample_0026	11189732	8513514	7156450	1993553	2657854	65	99.91
Sample_0026_CD56	Sample_0026	7013689	5694709	4296267	1611663	2160963	87.81	99.94
Sample_0026_CD235a	Sample_0026	7368450	6977435	6966828	2854723	579000	49.29	99.96
Sample_0027_CD4	Sample_0027	4120660	3444616	2527707	1	2089317	82.66	99.93
Sample_0027_CD8	Sample_0027	6505057	5963606	4873913	1851321	2050877	80.06	99.94
Sample_0027_CD14	Sample_0027	11701090	10604766	8198362	1372469	5255668	80.85	99.92
Sample_0027_CD15	Sample_0027	4929114	4658774	4342520	1510453	1144122	61.13	99.95
Sample_0027_CD19	Sample_0027	5716244	5140274	4154284	2380336	1363796	90.13	99.91
Sample_0027_CD56	Sample_0027	7149721	6635985	5770705	1425474	3669122	88.28	99.94
Sample_0027_CD235a	Sample_0027	3141008	3043352	3035356	2255237	636390	95.26	99.98
Sample_0028_CD4	Sample_0028	6104176	5546156	4098620	993299	2671630	89.42	99.95
Sample_0028_CD8	Sample_0028	3472033	3227938	2688655	1142472	961194	78.24	99.96
Sample_0028_CD15	Sample_0028	1449801	1399368	1376013	1175589	104243	93.01	99.92
Sample_0028_CD14	Sample_0028	7396518	6670402	5672459	1348249	3320423	82.3	99.9
Sample_0028_CD19	Sample_0028	4763790	4263550	3482914	1654419	954347	74.9	99.92
Sample_0028_CD56	Sample_0028	5237784	4820221	4279443	1150435	2535481	86.13	99.95
Sample_0028_CD235a	Sample_0028	2255975	2198220	2193360	1619011	464999	95.01	99.98
Sample_0029_CD8	Sample_0029	3826746	3542813	2959161	1986747	707234	91.04	99.96
Sample_0029_CD14	Sample_0029	5948206	5437532	4640785	1884345	1733273	77.95	99.91
Sample_0029_CD15	Sample_0029	3462757	3318928	3131924	1933756	188163	67.75	99.93
Sample_0029_CD19	Sample_0029	6210564	5409168	4108131	1790328	1766594	86.58	99.92
Sample_0029_CD56	Sample_0029	7346941	6749529	4849742	1719653	2346366	83.84	99.96
Sample_0029_CD235a	Sample_0029	2584349	2487642	2487024	2131776	819	85.75	100
Sample_0030_CD4	Sample_0030	4911065	4536909	2939495	1339847	1135103	84.2	99.97
Sample_0030_CD8	Sample_0030	2925405	2736724	2395104	1602112	317120	80.13	99.97
Sample_0030_CD14	Sample_0030	9215425	8324195	6368014	1437259	4108600	87.09	99.89
Sample_0030_CD15	Sample_0030	2444178	2317245	2195544	1096908	496785	72.59	99.95
Sample_0030_CD19	Sample_0030	5130805	4338259	3730186	1806547	848308	71.17	99.91
Sample_0030_CD56	Sample_0030	2633634	2448328	2115411	1353999	542856	89.67	99.96
Sample_0030_CD235a	Sample_0030	2764874	2672997	2672348	2516201	477	94.17	100
Sample_0031_CD4	Sample_0031	9828610	8939703	6120466	1475155	3097650	74.71	99.96
Sample_0031_CD8	Sample_0031	4810305	4418325	3752021	1567236	962538	67.42	99.96
Sample_0031_CD14	Sample_0031	5054498	4623408	4151462	1341422	1530613	69.18	99.92
Sample_0031_CD15	Sample_0031	3174007	2953785	2800449	2019942	372223	85.42	99.96
Sample_0031_CD19	Sample_0031	5788550	5122767	4528984	2340736	919140	71.98	99.91
Sample_0031_CD56	Sample_0031	6252147	5671612	4860560	1653817	1575122	66.43	99.96
Sample_0032_CD4	Sample_0032	8059447	7301574	4778978	1611468	2161536	78.95	99.95
Sample_0032_CD8	Sample_0032	3508499	3207561	2885141	2056433	655142	93.98	99.96
Sample_0032_CD14	Sample_0032	7193927	6212484	5053344	1581852	2880844	88.31	99.9
Sample_0032_CD15	Sample_0032	2545963	2425823	2398399	2157054	95959	93.94	99.92
Sample_0032_CD19	Sample_0032	9680809	7938813	6381062	2349132	2421174	74.76	99.9
Sample_0032_CD56	Sample_0032	4486122	4014274	3296704	1582021	1438077	91.61	99.95
Sample_0033_CD4	Sample_0033	3692761	2984455	2164380	0	1780405	82.26	99.94
Sample_0033_CD8	Sample_0033	13093703	11542711	9385368	2893820	4237970	75.99	99.95
Sample_0033_CD14	Sample_0033	7230581	6449125	5696209	2351743	2322011	82.05	99.85
Sample_0033_CD15	Sample_0033	2899988	2732287	2634401	1864434	477052	88.88	99.95
Sample_0033_CD19	Sample_0033	8222026	6971267	5619772	2127608	2064931	74.6	99.91
Sample_0033_CD56	Sample_0033	6063969	4963787	4587058	1341231	1975240	72.3	99.93
Sample_0033_CD235a	Sample_0033	3443422	3312325	3310906	2582498	43349	79.31	99.96
Sample_0034_CD4	Sample_0034	6949622	6275659	5099473	1842935	2324171	81.72	99.93
Sample_0034_CD8	Sample_0034	4466449	3946455	3385179	2290072	811914	91.63	99.93
Sample_0034_CD14	Sample_0034	5848820	5264993	4880298	1267812	1158423	49.71	99.86
Sample_0034_CD15	Sample_0034	2466285	2308161	2292242	1044656	37424	47.21	99.89
Sample_0034_CD19	Sample_0034	4297920	3674766	3212917	1046100	602722	51.32	99.88
Sample_0034_CD56	Sample_0034	3897665	3471872	3189865	2127719	865714	93.84	99.93
Sample_0034_CD235a	Sample_0034	2998639	2835317	2834122	1005442	18800	36.14	99.82
Sample_0035_CD4	Sample_0035	5520201	4848705	3188145	0	2691547	84.42	99.96
Sample_0035_CD8	Sample_0035	11709849	10801553	9130804	1438510	1723248	34.63	99.95
Sample_0035_CD14	Sample_0035	6973513	5971909	4820434	1122523	2801668	81.41	99.9
Sample_0035_CD15	Sample_0035	4369011	3983890	3739535	1236119	354377	42.53	99.93
Sample_0035_CD19	Sample_0035	7329354	6332650	5494320	1303336	1016893	42.23	99.85
Sample_0035_CD56	Sample_0035	4557061	3811517	2994881	1082822	1550750	87.94	99.92
Sample_0035_CD235a	Sample_0035	3269808	3073092	3071993	1552106	24964	51.34	99.89
Sample_0036_CD4	Sample_0036	3474596	3049377	1861473	0	1565485	84.1	99.96
Sample_0036_CD8	Sample_0036	4740746	4190863	3245244	1135275	918141	63.27	99.95
Sample_0036_CD14	Sample_0036	4795381	4192102	3589408	1104431	1299521	66.97	99.89
Sample_0036_CD15	Sample_0036	2673005	2480615	2449926	1348573	63410	57.63	99.93
Sample_0036_CD19	Sample_0036	7720267	6500244	5465280	1320847	1311766	48.17	99.93
Sample_0036_CD56	Sample_0036	3217356	2786176	2452776	1218875	968687	89.19	99.94
Sample_0036_CD235a	Sample_0036	3533822	3319908	3318121	1809440	96057	57.43	99.95
Sample_0037_CD4	Sample_0037	4766096	4043635	2336560	0	1788853	76.56	99.94
Sample_0037_CD8	Sample_0037	4072006	3352678	2431247	1190983	890423	85.61	99.93
Sample_0037_CD14	Sample_0037	7425184	6372124	5191213	1346909	2513770	74.37	99.91
Sample_0037_CD15	Sample_0037	2699724	2486111	2458374	1600024	67586	67.83	99.94
Sample_0037_CD19	Sample_0037	5962476	4687705	3731882	1494080	928927	64.93	99.87
Sample_0037_CD56	Sample_0037	13756085	10375021	7517677	1591106	4022850	74.68	99.92
Sample_0037_CD235a	Sample_0037	2754914	2607761	2605328	1599334	168138	67.84	99.92
Sample_0038_CD4	Sample_0038	7370844	6379823	4618082	1271707	2417026	79.88	99.93
Sample_0038_CD8	Sample_0038	7158074	6395281	5034474	1503245	1798796	65.59	99.94
Sample_0038_CD14	Sample_0038	3137249	2613919	2159168	0	1842359	85.33	99.9
Sample_0038_CD15	Sample_0038	3229492	2875670	2726512	1817225	336296	78.98	99.94
Sample_0038_CD19	Sample_0038	6136601	5114216	4292389	1785720	996384	64.81	99.92
Sample_0038_CD56	Sample_0038	5115630	4539210	4216897	1642624	1113610	65.36	99.93
Sample_0038_CD235a	Sample_0038	3988169	3759294	3755778	1825441	357538	58.12	99.96
Sample_0039_CD4	Sample_0039	3418212	2881110	1949130	0	1634327	83.85	99.94
Sample_0039_CD8	Sample_0039	8490359	6940109	5194526	2104702	2500120	88.65	99.94
Sample_0039_CD14	Sample_0039	2216032	1862390	1528473	0	1108438	72.52	99.89
Sample_0039_CD15	Sample_0039	2434796	2274880	2250582	1296314	59505	60.24	99.93
Sample_0039_CD19	Sample_0039	6373057	5509559	4936986	2068471	767273	57.44	99.93
Sample_0039_CD56	Sample_0039	9604813	7370378	5972788	1918918	3421568	89.41	99.94
Sample_0039_CD235a	Sample_0039	2446292	2327686	2325711	1382550	303838	72.51	99.95
Sample_0040_CD4	Sample_0040	7290166	6156832	4858065	1318254	3110140	91.16	99.96
Sample_0040_CD8	Sample_0040	6082424	4682015	3836574	1802734	1557849	87.59	99.94
Sample_0040_CD14	Sample_0040	2739415	2294440	1792492	0	1540013	85.91	99.89
Sample_0040_CD15	Sample_0040	3618003	3368450	3316805	1594316	131268	52.03	99.92
Sample_0040_CD19	Sample_0040	6950113	5624225	4524015	1816379	1428807	71.73	99.89
Sample_0040_CD56	Sample_0040	3363636	2575754	2264125	943658	1151703	92.55	99.94
Sample_0040_CD235a	Sample_0040	3416917	3251887	3249409	2120579	119194	68.93	99.96
Sample_0041_CD4	Sample_0041	3560803	3029349	2166442	0	1872404	86.43	99.96
Sample_0041_CD8	Sample_0041	8770311	7184650	5631923	1681063	2641364	76.75	99.95
Sample_0041_CD14	Sample_0041	5731877	4933373	4451963	1209485	2171882	75.95	99.89
Sample_0041_CD15	Sample_0041	2990673	2790735	2754846	1521919	98759	58.83	99.92
Sample_0041_CD19	Sample_0041	6830694	5585708	4474144	1665911	1323121	66.81	99.91
Sample_0041_CD56	Sample_0041	10075033	8074807	7145122	1909666	4129602	84.52	99.94
Sample_0041_CD235a	Sample_0041	3241033	3071295	3067877	2042219	342630	77.74	99.97
Sample_0042_CD4	Sample_0042	11353734	10205621	6736411	1505471	3258691	70.72	99.95
Sample_0042_CD8	Sample_0042	3311952	2974984	2716862	1066965	504252	57.83	99.96
Sample_0042_CD14	Sample_0042	14186141	12162461	10630442	3546745	5992506	89.74	99.88
Sample_0042_CD15	Sample_0042	5124170	4797039	4702490	3900876	468237	92.91	99.94
Sample_0042_CD19	Sample_0042	14418024	11693249	9950358	5605603	3516137	91.67	99.92
Sample_0042_CD56	Sample_0042	3834981	3302308	3006264	1343691	1134361	82.43	99.94
Sample_0042_CD235a	Sample_0042	4078586	3911488	3907133	3069672	378254	88.25	99.94
Sample_0043_CD4	Sample_0043	2751747	2498302	1809299	0	1632552	90.23	99.97
Sample_0043_CD8	Sample_0043	13152158	12148155	10329084	4462309	5131243	92.88	99.96
Sample_0043_CD14	Sample_0043	14439671	13248069	12470017	3239951	8309131	92.61	99.92
Sample_0043_CD15	Sample_0043	8426448	7944037	7560912	5046403	1841462	91.1	99.92
Sample_0043_CD19	Sample_0043	9265388	8294791	6845924	3621770	2670072	91.91	99.95
Sample_0043_CD56	Sample_0043	10297343	9704925	9078422	5080071	3404453	93.46	99.95
Sample_0043_CD235a	Sample_0043	6966323	6660086	6655415	6213994	163095	95.82	99.94
Sample_0044_WB	Sample_0044	5435485	5100646	5064285	0	4863874	96.04	99.98
Sample_0045_WB	Sample_0045	5416570	5152545	5125357	0	4958069	96.74	99.98
Sample_0046_WB	Sample_0046	5930675	5603899	5566329	0	5378805	96.63	99.98
Sample_0047_WB	Sample_0047	4507244	4286235	4249478	0	4078158	95.97	99.98
Sample_0048_WB	Sample_0048	5951023	5644188	5588230	0	5328327	95.35	99.99
Sample_0049_WB	Sample_0049	4470100	4260375	4222775	0	4034790	95.55	99.98
Sample_0050_WB	Sample_0050	3942971	3717757	3694046	0	3557600	96.31	99.98
Sample_0051_WB	Sample_0051	5601660	5285236	5261191	0	5120704	97.33	99.98
Sample_0052_WB	Sample_0052	4499642	4235264	4204720	0	4073682	96.88	99.98
Sample_0053_WB	Sample_0053	6593311	6221117	6167775	0	5938596	96.28	99.99
Sample_0054_WB	Sample_0054	7231020	6797018	6746117	0	6482289	96.09	99.99
Sample_0055_WB	Sample_0055	5493458	5228667	5195379	0	5001762	96.27	99.99
Sample_0056_WB	Sample_0056	4889745	4594238	4544864	0	4286238	94.31	99.98
Sample_0057_WB	Sample_0057	7893154	7385904	7339492	0	7093966	96.65	99.98
Sample_0058_WB	Sample_0058	5067292	4814723	4782374	0	4615807	96.52	99.98
Sample_0059_WB	Sample_0059	6296346	5926777	5852445	0	5350139	91.42	99.98
Sample_0060_WB	Sample_0060	6864690	6463647	6421665	0	6194285	96.46	99.98
Sample_0061_WB	Sample_0061	8478093	8003516	7971441	0	7795784	97.8	99.98
Sample_0062_WB	Sample_0062	5269666	5045757	5012061	0	4830627	96.38	99.98
Sample_0063_WB	Sample_0063	6675459	6335061	6310058	0	6120898	97	99.98
Sample_0064_WB	Sample_0064	5481771	5182327	5126406	0	4853392	94.67	99.98
Sample_0065_WB	Sample_0065	5050241	4748445	4698619	0	4519827	96.19	99.99
Sample_0066_WB	Sample_0066	5106803	4848685	4804529	0	4594570	95.63	99.98
Sample_0067_WB	Sample_0067	5938441	5609871	5573771	0	5352703	96.03	99.99
Sample_0068_WB	Sample_0068	2348059	2216347	2190941	0	2096947	95.71	99.98
Sample_0069_WB	Sample_0069	5102614	4831910	4794168	0	4582779	95.59	99.98
Sample_0070_WB	Sample_0070	4393877	4137870	4088679	0	3870564	94.67	99.98
Sample_0071_WB	Sample_0071	6399599	6080623	5990557	0	5627525	93.94	99.99
Sample_0072_WB	Sample_0072	4005203	3797208	3747196	0	3558387	94.96	99.99
Sample_0073_WB	Sample_0073	5033854	4758747	4708751	0	4456904	94.65	99.98
Sample_0074_WB	Sample_0074	5333525	5076976	5019200	0	4815768	95.95	99.98
Sample_0075_WB	Sample_0075	6019496	5660893	5573011	0	5210243	93.49	99.98
Sample_0076_WB	Sample_0076	5380793	5082250	5002664	0	4670861	93.37	99.98
Sample_0077_WB	Sample_0077	6161344	5816063	5732364	0	5305977	92.56	99.98
Sample_0078_WB	Sample_0078	5591105	5275722	5208910	0	4889675	93.87	99.98
Sample_0079_WB	Sample_0079	5444284	5133871	5091047	0	4891138	96.07	99.98
Sample_0080_WB	Sample_0080	6513947	6189692	6106178	0	5853394	95.86	99.98
Sample_0081_WB	Sample_0081	6086959	5736574	5689734	0	5499224	96.65	99.98
Sample_0082_WB	Sample_0082	6774071	6414615	6359721	0	6112386	96.11	99.98
Sample_0083_WB	Sample_0083	4579386	4357591	4314629	0	4101989	95.07	99.98
Sample_0084_WB	Sample_0084	5118076	4834243	4761770	0	4519574	94.91	99.98
Sample_0085_WB	Sample_0085	4099092	3880529	3834450	0	3637481	94.86	99.98
Sample_0086_WB	Sample_0086	5605721	5296726	5221391	0	4903486	93.91	99.98
Sample_0087_WB	Sample_0087	7418009	7011450	6944577	0	6625546	95.41	99.98
Sample_0088_WB	Sample_0088	7020674	6659221	6611046	0	6394037	96.72	99.98
Sample_0089_WB	Sample_0089	5737571	5439436	5344740	0	5088504	95.21	99.98
Sample_0090_WB	Sample_0090	5870487	5544576	5468340	0	5144301	94.07	99.98
Sample_0091_WB	Sample_0091	6883820	6526524	6447727	0	6091014	94.47	99.98
Sample_0092_WB	Sample_0092	4466302	4277317	4208937	0	3947515	93.79	99.98
Sample_0093_WB	Sample_0093	5748046	5467160	5399535	0	5083625	94.15	99.98
Sample_0094_WB	Sample_0094	4343732	4140187	4115178	0	3953787	96.08	99.98
Sample_0095_WB	Sample_0095	4128355	3912831	3875311	0	3703036	95.55	99.98
Sample_0096_WB	Sample_0096	3882083	3717745	3695122	0	3523205	95.35	99.98
Sample_0097_WB	Sample_0097	3436038	3249046	3228622	0	3075638	95.26	99.98
Sample_0098_WB	Sample_0098	5369083	5032225	4977235	0	4707302	94.58	99.98
Sample_0099_WB	Sample_0099	3076014	2917709	2899482	0	2759880	95.19	99.98
Sample_0100_WB	Sample_0100	4764696	4479380	4433201	0	4203312	94.81	99.99
Sample_0101_WB	Sample_0101	5408902	5103004	5062357	0	4827683	95.36	99.98
Sample_0102_WB	Sample_0102	4286672	4063493	4026909	0	3846847	95.53	99.99
Sample_0103_WB	Sample_0103	3302776	3161632	3147284	0	3007426	95.56	99.98
Sample_0104_WB	Sample_0104	4666253	4382329	4343124	0	4130782	95.11	99.98
Sample_0105_WB	Sample_0105	4113517	3877507	3860688	0	3745103	97.01	99.99
Sample_0106_WB	Sample_0106	3253728	3062711	3038068	0	2871125	94.5	99.99
Sample_0107_WB	Sample_0107	3905069	3703483	3680103	0	3451741	93.79	99.98
Sample_0108_WB	Sample_0108	5142377	4866194	4837309	0	4629424	95.7	99.98
Sample_0109_WB	Sample_0109	3970845	3734512	3703996	0	3510015	94.76	99.99
Sample_0110_WB	Sample_0110	4070618	3909800	3892736	0	3742566	96.14	99.98
Sample_0111_WB	Sample_0111	3133154	2985191	2971325	0	2776349	93.44	99.98
Sample_0112_WB	Sample_0112	2840108	2696972	2681037	0	2546710	94.99	99.98
Sample_0113_WB	Sample_0113	4167722	3958341	3940587	0	3765579	95.56	99.98
Sample_0114_WB	Sample_0114	4610652	4338423	4292498	0	4046062	94.26	99.99
Sample_0115_WB	Sample_0115	3936694	3753199	3733041	0	3582386	95.96	99.98
Sample_0116_WB	Sample_0116	3667743	3499819	3483988	0	3323977	95.41	99.98
Sample_0117_WB	Sample_0117	28286652	26805697	26644332	0	25497971	95.7	99.99
Sample_0118_WB	Sample_0118	12054547	11487984	11428876	0	11003394	96.28	99.98
Sample_0119_WB	Sample_0119	12036126	10173056	10081564	0	9581222	95.04	99.98
Sample_0120_WB	Sample_0120	12807512	10810153	10714438	0	10159401	94.82	99.98
Sample_0121_exosomes	Sample_0121	11319545	10801897	10799224	7456254	6912	69.11	99.95
Sample_0121_serum	Sample_0121	5175153	4879288	4825334	3234117	118764	69.48	99.92
Sample_0122_exosomes	Sample_0122	3906593	3550651	3550301	2967100	1270	83.61	100
Sample_0122_serum	Sample_0122	4572361	4312583	4264560	3151641	98584	76.21	99.89
Sample_0123_exosomes	Sample_0123	14231233	13423128	13421604	12196892	4853	90.91	99.93
Sample_0123_serum	Sample_0123	4033611	3848092	3794394	3303598	113404	90.05	99.9
Sample_0124_exosomes	Sample_0124	6629677	5972665	5971136	5333876	5559	89.42	99.93
Sample_0124_serum	Sample_0124	4083805	3902683	3875128	3539851	55587	92.78	99.86
Sample_0125_exosomes	Sample_0125	8017949	7207111	7205104	6591614	5714	91.56	100
Sample_0125_serum	Sample_0125	4860456	4631708	4551316	3905456	130624	88.68	99.87
Sample_0126_exosomes	Sample_0126	12280317	11180053	11175440	7259684	13423	65.08	99.91
Sample_0126_serum	Sample_0126	4228456	4056979	4011293	3561785	73636	90.63	99.83
Sample_0127_exosomes	Sample_0127	13765087	12744874	12736063	10184640	21514	80.14	99.94
Sample_0127_serum	Sample_0127	4293905	4088280	4062132	3797476	50492	94.73	99.81
Sample_0128_exosomes	Sample_0128	7832708	7064336	7061240	6135623	11635	87.06	100
Sample_0128_serum	Sample_0128	4337850	3332988	3286081	2525080	54957	78.51	99.89
Sample_0129_exosomes	Sample_0129	7889526	7107030	7102225	5315515	10265	74.99	100
Sample_0129_serum	Sample_0129	3956962	3192468	3167057	2536184	46871	81.56	99.91
Sample_0130_exosomes	Sample_0130	25838063	24789795	24784069	23265543	24389	93.97	99.92
Sample_0130_serum	Sample_0130	4870761	3977036	3956947	2670123	32453	68.3	99.93
Sample_0131_exosomes	Sample_0131	7633166	7082203	7079511	6350300	10227	89.84	100
Sample_0131_serum	Sample_0131	5546918	4607628	4556782	2305894	72451	52.19	99.94
Sample_0132_exosomes	Sample_0132	22171733	21044767	21038952	16732585	19851	79.63	99.94
Sample_0132_serum	Sample_0132	6082815	5077464	5037221	2612460	73576	53.32	99.9
Sample_0133_exosomes	Sample_0133	15370279	14764529	14761474	8325555	16284	56.51	99.93
Sample_0133_serum	Sample_0133	4878453	3763986	3704938	2868794	114596	80.52	99.95
Sample_0134_exosomes	Sample_0134	23468297	22346996	22341212	18878776	11173	84.55	99.82
Sample_0134_serum	Sample_0134	7045323	6035181	5983122	2304663	67302	39.64	99.9
Sample_0135_exosomes	Sample_0135	18159334	16938077	16930450	13990413	9500	82.69	99.93
Sample_0135_serum	Sample_0135	5738274	4694928	4659198	3130806	91388	69.16	99.96
Sample_0136_exosomes	Sample_0136	28196546	26812448	26808660	21908202	9012	81.75	99.97
Sample_0136_serum	Sample_0136	5739773	4834132	4790610	2146073	54135	45.93	99.92
Sample_0137_exosomes	Sample_0137	24449675	23479773	23471752	20076064	10374	85.58	99.98
Sample_0137_serum	Sample_0137	3716254	3180639	3166824	2046025	32109	65.62	99.92
Sample_0138_exosomes	Sample_0138	13391352	12685878	12680550	11514099	7538	90.86	99.88
Sample_0138_serum	Sample_0138	3595172	2985909	2969506	2452369	40845	83.96	99.96
Sample_0139_exosomes	Sample_0139	32684316	31434856	31428888	25000410	9683	79.58	99.9
Sample_0139_serum	Sample_0139	3065943	2657880	2642354	2169844	33346	83.38	99.93
Sample_0140_exosomes	Sample_0140	25154221	24044119	24039636	19536974	8178	81.3	99.91
Sample_0140_serum	Sample_0140	7154599	6234631	6191121	3224969	56727	53.01	99.92
Sample_0141_exosomes	Sample_0141	31649098	30527927	30520495	24599185	13973	80.64	99.91
Sample_0141_serum	Sample_0141	9359406	8050403	8001565	3516993	64458	44.76	99.95
Sample_0142_exosomes	Sample_0142	23939713	23062365	23053337	18745276	17645	81.39	99.96
Sample_0142_serum	Sample_0142	5048273	4752888	4722518	3384278	85168	73.47	99.9
Sample_0143_exosomes	Sample_0143	28839361	27770783	27765167	23019355	9259	82.94	99.93
Sample_0143_serum	Sample_0143	6150240	5306768	5287505	2613020	28622	49.96	99.92
Sample_0144_exosomes	Sample_0144	10348657	10008562	10007052	9330091	4161	93.28	99.86
Sample_0144_serum	Sample_0144	4286327	3652232	3633151	2533836	60811	71.42	99.91
Sample_0145_exosomes	Sample_0145	15818526	15330530	15326428	14348031	12051	93.69	99.92
Sample_0145_serum	Sample_0145	4353377	3714613	3681619	2989297	44718	82.41	99.95
Sample_0146_exosomes	Sample_0146	21185359	20438569	20436104	13884992	10871	68	99.97
Sample_0146_serum	Sample_0146	9038610	7758783	7712478	3422098	54292	45.07	99.91
Sample_0147_exosomes	Sample_0147	4220112	3950810	3948915	3323522	3945	84.26	99.97
Sample_0147_serum	Sample_0147	5026703	4242465	4214063	3281305	25905	78.48	99.89
Sample_0148_exosomes	Sample_0148	14081276	13577556	13575612	12304655	6185	90.68	99.95
Sample_0148_serum	Sample_0148	6039034	5191268	5163705	2802837	23761	54.74	99.84
Sample_0149_exosomes	Sample_0149	15288119	14715299	14711900	12247352	6475	83.29	99.98
Sample_0149_serum	Sample_0149	6594987	5613998	5589322	3224752	34818	58.32	99.84
Sample_0150_exosomes	Sample_0150	17285546	16681199	16678632	11603899	7619	69.62	99.94
Sample_0150_serum	Sample_0150	6297206	5446389	5429233	2726613	25204	50.69	99.83
Sample_0151_exosomes	Sample_0151	11267404	10807991	10805739	9056583	6484	83.87	100
Sample_0151_serum	Sample_0151	4869025	4180489	4161752	2441089	29259	59.36	99.75
Sample_0152_exosomes	Sample_0152	2610010	2435425	2434838	2192543	1382	90.11	100
Sample_0152_serum	Sample_0152	4814134	4178807	4147650	3225606	47087	78.9	99.88
Sample_0153_exosomes	Sample_0153	14212629	13653441	13644073	9180738	29182	67.5	99.94
Sample_0153_serum	Sample_0153	608439	546347	543284	341421	6847	64.1	99.85
Sample_0154_exosomes	Sample_0154	4629102	4411191	4410510	3987556	1376	90.44	99.9
Sample_0154_serum	Sample_0154	587865	515814	512524	357415	4985	70.71	99.89
Sample_0155_exosomes	Sample_0155	235174	218726	218674	115848	223	53.08	100
Sample_0156_exosomes	Sample_0156	231678	216436	216400	95684	944	44.65	100
Sample_0157_exosomes	Sample_0157	342880	318082	318031	141738	295	44.66	100
Sample_0158_exosomes	Sample_0158	212707	197736	197711	101324	267	51.38	100
Sample_0159_serum	Sample_0159	4212876	4003225	3947010	3558306	88771	92.4	99.9
Sample_0160_serum	Sample_0160	4718418	4494442	4460948	4107569	58130	93.38	99.85
Sample_0161_serum	Sample_0161	5400147	5176997	5133965	4535985	255190	93.32	99.93
Sample_0162_serum	Sample_0162	4546770	4322140	4257203	3777745	79166	90.6	99.9

## Sheet: Supplementary Table S2
Supplementary Table S2. Genomic context and miRNA family summary of cell-type specific miRNAs
cell type ID	precursor AC	precursor ID	family AC	family ID	overlaping gene EnsEMBL ID	overlaping gene EnsEMBL biotype	precursor exonic	precursor intronic	precursor UTR	precursor intergenic	number of cell-type spec. miRNAs	number of miRFams	avg. number of miRNAs per family	intronic mirnas	exonic mirnas	UTR mirnas	intergenic mirnas	intronic & exonic mirnas	intronic & UTR mirnas	exonic & UTR mirnas
Monocytes (CD14+)	MI0000072	hsa-mir-18a	MIPF0000001	mir-17	ENSG00000215417	processed_transcript	yes	yes	no	no	25	18	1.4	20 (80 %)	3 (12 %)	1 (4 %)	4 (16 %)	2 (8 %)	1 (4 %)	1 (4 %)
	MI0000108	hsa-mir-103a-2	MIPF0000024	mir-103	ENSG00000125779	protein_coding	no	yes	no	no
	MI0000109	hsa-mir-103a-1	MIPF0000024	mir-103	ENSG00000120137	protein_coding	no	yes	no	no
	MI0000079	hsa-mir-23a	MIPF0000027	mir-23			no	no	no	yes
	MI0000745	hsa-mir-301a	MIPF0000034	mir-130	ENSG00000182628	protein_coding	no	yes	no	no
	MI0005568	hsa-mir-301b	MIPF0000034	mir-130	ENSG00000207751	processed_transcript	no	yes	no	no
	MI0000085	hsa-mir-27a	MIPF0000036	mir-27			no	no	no	yes
	MI0000080	hsa-mir-24-1	MIPF0000041	mir-24	ENSG00000148120	protein_coding	yes	yes	yes	no
	MI0000081	hsa-mir-24-2	MIPF0000041	mir-24	ENSG00000267519	lincRNA	no	no	no	yes
	MI0000077	hsa-mir-21	MIPF0000060	mir-21	ENSG00000062716	protein_coding	yes	no	no	no
	MI0000484	hsa-mir-188	MIPF0000113	mir-188	ENSG00000171365	protein_coding	no	yes	no	no
	MI0003205	hsa-mir-532	MIPF0000113	mir-188	ENSG00000171365	protein_coding	no	yes	no	no
	MI0003684	hsa-mir-660	MIPF0000113	mir-188	ENSG00000171365	protein_coding	no	yes	no	no
	MI0003184	hsa-mir-500a	MIPF0000139	mir-500	ENSG00000171365	protein_coding	no	yes	no	no
	MI0003185	hsa-mir-501	MIPF0000139	mir-500	ENSG00000171365	protein_coding	no	yes	no	no
	MI0003186	hsa-mir-502	MIPF0000139	mir-500	ENSG00000171365	protein_coding	no	yes	no	no
	MI0000808	hsa-mir-326	MIPF0000143	mir-326	ENSG00000137486	protein_coding	no	yes	no	no
	MI0000786	hsa-mir-378a	MIPF0000168	mir-378	ENSG00000155846	protein_coding	no	yes	no	no
	MI0003820	hsa-mir-454	MIPF0000174	mir-454	ENSG00000182628	protein_coding	no	yes	no	no
	MI0000802	hsa-mir-340	MIPF0000191	mir-340	ENSG00000113269	protein_coding	no	yes	no	no
	MI0000815	hsa-mir-339	MIPF0000193	mir-339	ENSG00000146540	protein_coding	no	yes	no	no
	MI0000762	hsa-mir-362	MIPF0000209	mir-362	ENSG00000171365	protein_coding	no	yes	no	no
	MI0003581	hsa-mir-574	MIPF0000419	mir-574	ENSG00000197712	protein_coding	no	yes	no	no
	MI0006370	hsa-mir-1303	MIPF0000608	mir-1303			no	no	no	yes
	MI0014208	hsa-mir-3174	MIPF0001569	mir-3174	ENSG00000140548	protein_coding	no	yes	no	no
Neutrophils (CD15+)	MI0000095	hsa-mir-93	MIPF0000001	mir-17	ENSG00000166508	protein_coding	no	yes	no	no	50	39	1.3	31 (62 %)	11 (22 %)	3 (6 %)	9 (18 %)	1 (2 %)	0 (0 %)	3 (6 %)
	MI0000065	hsa-let-7d	MIPF0000002	let-7	ENSG00000269946, ENSG00000230262	lincRNA, lincRNA	no	yes	no	no
	MI0000749	hsa-mir-30e	MIPF0000005	mir-30	ENSG00000066136	protein_coding	no	yes	no	no
	MI0000271	hsa-mir-181c	MIPF0000007	mir-181	ENSG00000187556	protein_coding	no	yes	no	no
	MI0000082	hsa-mir-25	MIPF0000013	mir-25	ENSG00000166508	protein_coding	no	yes	no	no
	MI0000743	hsa-mir-34c	MIPF0000039	mir-34			no	no	no	yes
	MI0000242	hsa-mir-199a-1	MIPF0000040	mir-199	ENSG00000079805	protein_coding	no	yes	no	no
	MI0000281	hsa-mir-199a-2	MIPF0000040	mir-199	ENSG00000197959, ENSG00000230630	protein_coding, antisense	no	yes	no	no
	MI0000282	hsa-mir-199b	MIPF0000040	mir-199	ENSG00000106976	protein_coding	no	yes	no	no
	MI0000084	hsa-mir-26b	MIPF0000043	mir-26	ENSG00000144579	protein_coding	no	yes	no	no
	MI0000253	hsa-mir-148a	MIPF0000056	mir-148			no	no	no	yes
	MI0000273	hsa-mir-183	MIPF0000066	mir-183			no	no	no	yes
	MI0000300	hsa-mir-223	MIPF0000067	mir-223	ENSG00000274536	antisense	yes	no	no	no
	MI0017393	hsa-mir-371b	MIPF0000068	mir-290	ENSG00000269877	lincRNA	yes	no	no	no
	MI0000461	hsa-mir-145	MIPF0000079	mir-145	ENSG00000249669	lincRNA	no	yes	no	no
	MI0000460	hsa-mir-144	MIPF0000093	mir-144	ENSG00000264066	lincRNA	yes	no	no	no
	MI0000459	hsa-mir-143	MIPF0000094	mir-143	ENSG00000249669	lincRNA	yes	no	no	no
	MI0000814	hsa-mir-338	MIPF0000097	mir-338	ENSG00000181409	protein_coding	no	yes	no	no
	MI0000239	hsa-mir-197	MIPF0000123	mir-197	ENSG00000065135	protein_coding	yes	no	yes	no
	MI0001652	hsa-mir-450a-1	MIPF0000128	mir-450			no	no	no	yes
	MI0003187	hsa-mir-450a-2	MIPF0000128	mir-450			no	no	no	yes
	MI0005531	hsa-mir-450b	MIPF0000128	mir-450			no	no	no	yes
	MI0001729	hsa-mir-451a	MIPF0000148	mir-451	ENSG00000264066	lincRNA	yes	no	no	no
	MI0001446	hsa-mir-424	MIPF0000164	mir-322	ENSG00000223749	lincRNA	no	no	no	yes
	MI0003820	hsa-mir-454	MIPF0000174	mir-454	ENSG00000182628	protein_coding	no	yes	no	no
	MI0003686	hsa-mir-542	MIPF0000185	mir-542			no	no	no	yes
	MI0000804	hsa-mir-328	MIPF0000203	mir-328	ENSG00000102890	protein_coding	no	yes	no	no
	MI0001448	hsa-mir-425	MIPF0000242	mir-425	ENSG00000178149	protein_coding	no	yes	no	no
	MI0003668	hsa-mir-548d-1	MIPF0000317	mir-548	ENSG00000156802	protein_coding	no	yes	no	no
	MI0003671	hsa-mir-548d-2	MIPF0000317	mir-548	ENSG00000154217	protein_coding	no	yes	no	no
	MI0006344	hsa-mir-548e	MIPF0000317	mir-548	ENSG00000108061	protein_coding	no	yes	no	no
	MI0006354	hsa-mir-548k	MIPF0000317	mir-548	ENSG00000131626, ENSG00000254604	protein_coding, antisense	no	yes	no	no
	MI0019145	hsa-mir-548au	MIPF0000317	mir-548	ENSG00000197724	protein_coding	no	yes	no	no
	MI0022210	hsa-mir-548ay	MIPF0000317	mir-548			no	no	no	yes
	MI0003600	hsa-mir-550a-1	MIPF0000334	mir-550	ENSG00000180233	protein_coding	no	yes	no	no
	MI0003601	hsa-mir-550a-2	MIPF0000334	mir-550	ENSG00000229358	unprocessed_pseudogene	no	yes	no	no
	MI0003762	hsa-mir-550a-3	MIPF0000334	mir-550	ENSG00000225264, ENSG00000227855	transcribed_processed_pseudogene, transcribed_unprocessed_pseudogene	no	yes	no	no
	MI0003589	hsa-mir-582	MIPF0000417	mir-582	ENSG00000113448	protein_coding	no	yes	no	no
	MI0005767	hsa-mir-942	MIPF0000511	mir-942	ENSG00000116830	protein_coding	no	yes	no	no
	MI0003642	hsa-mir-628	MIPF0000529	mir-628	ENSG00000260916, ENSG00000261771	protein_coding, processed_transcript	no	yes	no	no
	MI0006443	hsa-mir-1306	MIPF0000531	mir-1306	ENSG00000128191	protein_coding	yes	no	no	no
	MI0003641	hsa-mir-627	MIPF0000550	mir-627	ENSG00000166887	protein_coding	no	yes	no	no
	MI0003632	hsa-mir-618	MIPF0000553	mir-618	ENSG00000111052	protein_coding	no	yes	no	no
	MI0003834	hsa-mir-769	MIPF0000727	mir-769	ENSG00000104983	protein_coding	no	yes	no	no
	MI0007259	hsa-mir-1538	MIPF0000903	mir-1538	ENSG00000102908	protein_coding	yes	no	yes	no
	MI0015873	hsa-mir-2355	MIPF0000938	mir-2355	ENSG00000118263	protein_coding	no	yes	no	no
	MI0006394	hsa-mir-1260a	MIPF0001020	mir-1260a	ENSG00000165553	protein_coding	yes	no	yes	no
	MI0016005	hsa-mir-3615	MIPF0001540	mir-3615	ENSG00000266036, ENSG00000109062	antisense, protein_coding	yes	no	no	no
	MI0009986	hsa-mir-1976	MIPF0001633	mir-1976	ENSG00000117676	protein_coding	no	yes	no	no
	MI0015995	hsa-mir-3605	MIPF0001639	mir-3605	ENSG00000225313, ENSG00000134686	antisense, protein_coding	no	yes	no	no
B cells (CD19+)	MI0000088	hsa-mir-30a	MIPF0000005	mir-30	ENSG00000269966, ENSG00000233237	lincRNA, lincRNA	no	yes	no	no	10	7	1.4	8 (80 %)	2 (20 %)	0 (0 %)	2 (20 %)	2 (20 %)	0 (0 %)	0 (0 %)
	MI0000489	hsa-mir-195	MIPF0000006	mir-15	ENSG00000267047, ENSG00000267532	antisense, antisense	yes	yes	no	no
	MI0000809	hsa-mir-151a	MIPF0000057	mir-28	ENSG00000169398	protein_coding	no	yes	no	no
	MI0003772	hsa-mir-151b	MIPF0000057	mir-28	ENSG00000196405	protein_coding	no	yes	no	no
	MI0000455	hsa-mir-138-2	MIPF0000075	mir-138			no	no	no	yes
	MI0000476	hsa-mir-138-1	MIPF0000075	mir-138			no	no	no	yes
	MI0002470	hsa-mir-486-1	MIPF0000220	mir-486	ENSG00000029534	protein_coding	no	yes	no	no
	MI0023622	hsa-mir-486-2	MIPF0000220	mir-486	ENSG00000029534	protein_coding	no	yes	no	no
	MI0003584	hsa-mir-577	MIPF0000530	mir-577	ENSG00000174607	protein_coding	no	yes	no	no
	MI0016426	hsa-mir-3150b	MIPF0001102	mir-3150	ENSG00000156170, ENSG00000245080, ENSG00000254248	protein_coding, antisense, antisense	no	yes	no	no
T helper cells (CD4+)	MI0000066	hsa-let-7e	MIPF0000002	let-7	ENSG00000269959	lincRNA	yes	no	no	no	9	3	3	3 (33.3 %)	2 (22.2 %)	0 (0 %)	4 (44.4 %)	0 (0 %)	0 (0 %)	0 (0 %)
	MI0000101	hsa-mir-99a	MIPF0000033	mir-10	ENSG00000215386	lincRNA	no	yes	no	no
	MI0000446	hsa-mir-125b-1	MIPF0000033	mir-10	ENSG00000255248	processed_transcript	no	yes	no	no
	MI0000469	hsa-mir-125a	MIPF0000033	mir-10	ENSG00000269959	lincRNA	yes	no	no	no
	MI0000470	hsa-mir-125b-2	MIPF0000033	mir-10	ENSG00000215386	lincRNA	no	yes	no	no
	MI0000746	hsa-mir-99b	MIPF0000033	mir-10	ENSG00000269959	lincRNA	no	no	no	yes
	MI0003196	hsa-mir-509-1	MIPF0000130	mir-506			no	no	no	yes
	MI0005530	hsa-mir-509-2	MIPF0000130	mir-506			no	no	no	yes
	MI0005717	hsa-mir-509-3	MIPF0000130	mir-506			no	no	no	yes
NK cells (CD56+)	MI0000113	hsa-mir-106a	MIPF0000001	mir-17	ENSG00000283638	processed_transcript	yes	no	no	no	18	12	1.5	10 (55.6 %)	8 (44.4 %)	2 (11.1 %)	3 (16.7 %)	3 (16.7 %)	2 (11.1 %)	2 (11.1 %)
	MI0001518	hsa-mir-18b	MIPF0000001		ENSG00000283638	processed_transcript	yes	no	no	no
	MI0001519	hsa-mir-20b	MIPF0000001		ENSG00000283638	processed_transcript	yes	no	no	no
	MI0000269	hsa-mir-181a-2	MIPF0000007	mir-181	ENSG00000148200, ENSG00000224020	protein_coding, antisense	no	yes	no	no
	MI0000270	hsa-mir-181b-1	MIPF0000007		ENSG00000229989	lincRNA	no	yes	no	no
	MI0000289	hsa-mir-181a-1	MIPF0000007		ENSG00000229989	lincRNA	no	yes	no	no
	MI0000683	hsa-mir-181b-2	MIPF0000007		ENSG00000148200, ENSG00000224020	protein_coding, antisense	no	yes	no	no
	MI0000450	hsa-mir-133a-1	MIPF0000029	mir-133	ENSG00000101752, ENSG00000265142	protein_coding, antisense	yes	yes	no	no
	MI0000451	hsa-mir-133a-2	MIPF0000029		ENSG00000174407	antisense	no	yes	no	no
	MI0000266	hsa-mir-10a	MIPF0000033	mir-10	ENSG00000120093, ENSG00000233101, ENSG00000182742, ENSG00000257178	protein_coding, antisense, protein_coding, sense_intronic	yes	yes	yes	no
	MI0000078	hsa-mir-22	MIPF0000053	mir-22	ENSG00000186594	lincRNA	yes	no	no	no
	MI0000462	hsa-mir-152	MIPF0000056	mir-148	ENSG00000005243	protein_coding	no	yes	no	no
	MI0000288	hsa-mir-212	MIPF0000065	mir-132			no	no	no	yes
	MI0000764	hsa-mir-363	MIPF0000138	mir-363	ENSG00000283638	processed_transcript	yes	no	no	no
	MI0000803	hsa-mir-330	MIPF0000200	mir-330	ENSG00000125746	protein_coding	yes	yes	yes	no
	MI0006345	hsa-mir-548j	MIPF0000317	mir-548	ENSG00000128294	protein_coding	no	yes	no	no
	MI0005564	hsa-mir-873	MIPF0000390	mir-873			no	no	no	yes
	MI0006349	hsa-mir-1287	MIPF0000725	mir-1287	ENSG00000119943	protein_coding	no	no	no	yes
Cytotoxic T cells (CD8+)	MI0000238	hsa-mir-196a-1	MIPF0000031	mir-196	ENSG00000260027, ENSG00000242207	protein_coding, antisense	no	yes	no	no	3	2	1.5	3 (100 %)	1 (33.3 %)	0 (0 %)	0 (0 %)	1 (33.3 %)	0 (0 %)	0 (0 %)
	MI0000279	hsa-mir-196a-2	MIPF0000031	mir-196	ENSG00000273049, ENSG00000197757	protein_coding, protein_coding	no	yes	no	no
	MI0000816	hsa-mir-335	MIPF0000196	mir-335	ENSG00000106484, ENSG00000270823	protein_coding, antisense	yes	yes	no	no

## Sheet: Supplementary Table S3
Supplementary Table S3. Lists of miRNAs which were present in coresponding blood compounds.
Compound	List of expressed miRNAs
T helper cells (CD4+)	hsa-let-7a-3p, hsa-let-7a-5p, hsa-let-7b-3p, hsa-let-7b-5p, hsa-let-7c-5p, hsa-let-7d-3p, hsa-let-7d-5p, hsa-let-7e-5p, hsa-let-7f-2-3p, hsa-let-7f-5p, hsa-let-7g-3p, hsa-let-7g-5p, hsa-let-7i-3p, hsa-let-7i-5p, hsa-miR-101-3p, hsa-miR-101-5p, hsa-miR-103a-3p, hsa-miR-106a-5p, hsa-miR-106b-3p, hsa-miR-106b-5p, hsa-miR-107, hsa-miR-10a-5p, hsa-miR-10b-5p, hsa-miR-125a-5p, hsa-miR-125b-2-3p, hsa-mi…
Cytotoxic T cells (CD8+)	hsa-let-7a-3p, hsa-let-7a-5p, hsa-let-7b-3p, hsa-let-7b-5p, hsa-let-7c-5p, hsa-let-7d-3p, hsa-let-7d-5p, hsa-let-7e-5p, hsa-let-7f-2-3p, hsa-let-7f-5p, hsa-let-7g-3p, hsa-let-7g-5p, hsa-let-7i-3p, hsa-let-7i-5p, hsa-miR-101-3p, hsa-miR-101-5p, hsa-miR-103a-3p, hsa-miR-106a-5p, hsa-miR-106b-3p, hsa-miR-106b-5p, hsa-miR-107, hsa-miR-10a-5p, hsa-miR-10b-5p, hsa-miR-125a-5p, hsa-miR-125b-5p, hsa-miR-…
Monocytes (CD14+)	hsa-let-7a-3p, hsa-let-7a-5p, hsa-let-7b-3p, hsa-let-7b-5p, hsa-let-7c-5p, hsa-let-7d-3p, hsa-let-7d-5p, hsa-let-7e-5p, hsa-let-7f-1-3p, hsa-let-7f-2-3p, hsa-let-7f-5p, hsa-let-7g-3p, hsa-let-7g-5p, hsa-let-7i-3p, hsa-let-7i-5p, hsa-miR-100-5p, hsa-miR-101-3p, hsa-miR-101-5p, hsa-miR-103a-3p, hsa-miR-106a-5p, hsa-miR-106b-3p, hsa-miR-106b-5p, hsa-miR-107, hsa-miR-10a-5p, hsa-miR-10b-5p, hsa-miR-1…
Neutrophils (CD15+)	hsa-let-7a-5p, hsa-let-7b-3p, hsa-let-7b-5p, hsa-let-7d-3p, hsa-let-7d-5p, hsa-let-7f-5p, hsa-let-7g-5p, hsa-let-7i-5p, hsa-miR-101-3p, hsa-miR-103a-3p, hsa-miR-106b-3p, hsa-miR-106b-5p, hsa-miR-107, hsa-miR-10a-5p, hsa-miR-125a-5p, hsa-miR-126-5p, hsa-miR-1260a, hsa-miR-128-3p, hsa-miR-1304-3p, hsa-miR-1307-3p, hsa-miR-1307-5p, hsa-miR-130a-3p, hsa-miR-130b-3p, hsa-miR-130b-5p, hsa-miR-132-3p, h…
B cells (CD19+)	hsa-let-7a-5p, hsa-let-7b-5p, hsa-let-7d-3p, hsa-let-7d-5p, hsa-let-7f-5p, hsa-let-7g-5p, hsa-let-7i-3p, hsa-let-7i-5p, hsa-miR-101-3p, hsa-miR-103a-3p, hsa-miR-106b-3p, hsa-miR-106b-5p, hsa-miR-107, hsa-miR-10a-5p, hsa-miR-125a-5p, hsa-miR-126-5p, hsa-miR-1260b, hsa-miR-1273h-3p, hsa-miR-1275, hsa-miR-128-3p, hsa-miR-1285-3p, hsa-miR-1307-3p, hsa-miR-1307-5p, hsa-miR-130b-3p, hsa-miR-130b-5p, hs…
NK cells (CD56+)	hsa-let-7a-3p, hsa-let-7a-5p, hsa-let-7b-3p, hsa-let-7b-5p, hsa-let-7c-5p, hsa-let-7d-3p, hsa-let-7d-5p, hsa-let-7e-5p, hsa-let-7f-1-3p, hsa-let-7f-2-3p, hsa-let-7f-5p, hsa-let-7g-3p, hsa-let-7g-5p, hsa-let-7i-3p, hsa-let-7i-5p, hsa-miR-101-3p, hsa-miR-101-5p, hsa-miR-103a-3p, hsa-miR-106a-5p, hsa-miR-106b-3p, hsa-miR-106b-5p, hsa-miR-107, hsa-miR-10a-5p, hsa-miR-10b-5p, hsa-miR-1249-3p, hsa-miR-…
RBCs (CD235a)	hsa-let-7a-5p, hsa-let-7b-5p, hsa-let-7d-5p, hsa-let-7f-5p, hsa-let-7g-5p, hsa-let-7i-5p, hsa-miR-101-3p, hsa-miR-103a-3p, hsa-miR-106b-3p, hsa-miR-106b-5p, hsa-miR-107, hsa-miR-126-3p, hsa-miR-126-5p, hsa-miR-128-3p, hsa-miR-130a-3p, hsa-miR-130b-3p, hsa-miR-140-3p, hsa-miR-142-3p, hsa-miR-142-5p, hsa-miR-144-3p, hsa-miR-144-5p, hsa-miR-146b-5p, hsa-miR-148a-3p, hsa-miR-150-5p, hsa-miR-151a-3p, …
Exosome	hsa-let-7a-5p, hsa-let-7f-5p, hsa-let-7g-5p, hsa-let-7i-5p, hsa-miR-101-3p, hsa-miR-103a-3p, hsa-miR-10a-5p, hsa-miR-10b-5p, hsa-miR-125a-5p, hsa-miR-126-3p, hsa-miR-126-5p, hsa-miR-142-5p, hsa-miR-143-3p, hsa-miR-144-3p, hsa-miR-146a-5p, hsa-miR-146b-5p, hsa-miR-148a-3p, hsa-miR-148b-3p, hsa-miR-151a-3p, hsa-miR-151a-5p, hsa-miR-15a-5p, hsa-miR-16-5p, hsa-miR-181a-5p, hsa-miR-186-5p, hsa-miR-191…
Serum	hsa-let-7a-5p, hsa-let-7b-5p, hsa-let-7d-3p, hsa-let-7d-5p, hsa-let-7f-5p, hsa-let-7g-5p, hsa-let-7i-5p, hsa-miR-101-3p, hsa-miR-103a-3p, hsa-miR-106b-3p, hsa-miR-107, hsa-miR-10a-5p, hsa-miR-10b-5p, hsa-miR-125a-5p, hsa-miR-126-3p, hsa-miR-126-5p, hsa-miR-127-3p, hsa-miR-128-3p, hsa-miR-1307-3p, hsa-miR-1307-5p, hsa-miR-130b-3p, hsa-miR-140-3p, hsa-miR-142-5p, hsa-miR-143-3p, hsa-miR-146a-5p, hs…
Whole blood (WB)	hsa-let-7a-3p, hsa-let-7a-5p, hsa-let-7b-3p, hsa-let-7b-5p, hsa-let-7c-5p, hsa-let-7d-3p, hsa-let-7d-5p, hsa-let-7f-1-3p, hsa-let-7f-2-3p, hsa-let-7f-5p, hsa-let-7g-5p, hsa-let-7i-3p, hsa-let-7i-5p, hsa-miR-100-5p, hsa-miR-101-3p, hsa-miR-101-5p, hsa-miR-103a-3p, hsa-miR-106a-5p, hsa-miR-106b-3p, hsa-miR-106b-5p, hsa-miR-107, hsa-miR-10a-5p, hsa-miR-10b-5p, hsa-miR-1180-3p, hsa-miR-1249-3p, hsa-m…

## Sheet: Supplementary Table S4
Supplementary Table S4. Cell type specific miRNA-arms and isomiRs.
Cell type	miRNA-arms	IsomiRs
Monocytes (CD14+)	hsa-miR-103a-3p hsa-miR-18a-5p hsa-miR-21-3p hsa-miR-21-5p hsa-miR-24-2-5p hsa-miR-27a-5p hsa-miR-301a-3p hsa-miR-301b-3p hsa-miR-326 hsa-miR-339-5p hsa-miR-378a-3p hsa-miR-454-3p hsa-miR-500a-3p hsa-miR-501-3p hsa-miR-532-3p hsa-miR-532-5p hsa-miR-660-5p hsa-miR-7706 hsa-let-7f-1-3p hsa-miR-1303 hsa-miR-188-3p hsa-miR-188-5p hsa-miR-23a-5p hsa-miR-3174 hsa-miR-340-3p hsa-miR-362-5p hsa-miR-4802-…	hsa-let-7a-5p.iso.t5:G.seed:0.t3:0.ad:0.mm:0 hsa-let-7d-5p.iso.t5:0.seed:0.t3:0.ad:A.mm:0 hsa-let-7d-5p.iso.t5:0.seed:0.t3:T.ad:0.mm:0 hsa-let-7d-5p.ref.t5:0.seed:0.t3:0.ad:0.mm:0 hsa-let-7f-1-3p.iso.t5:0.seed:0.t3:c.ad:T.mm:0 hsa-miR-103a-3p.iso.t5:0.seed:0.t3:0.ad:G.mm:0 hsa-miR-103a-3p.iso.t5:0.seed:0.t3:0.ad:T.mm:0 hsa-miR-103a-3p.iso.t5:0.seed:0.t3:A.ad:0.mm:0 hsa-miR-103a-3p.iso.t5:0.seed:0…
Neutrophils (CD15+)	hsa-let-7d-3p hsa-miR-1260a hsa-miR-143-3p hsa-miR-148a-3p hsa-miR-148a-5p hsa-miR-181c-3p hsa-miR-197-3p hsa-miR-1976 hsa-miR-199a-3p hsa-miR-199b-3p hsa-miR-199b-5p hsa-miR-223-3p hsa-miR-25-3p hsa-miR-26b-3p hsa-miR-30e-5p hsa-miR-328-3p hsa-miR-3615 hsa-miR-424-5p hsa-miR-425-5p hsa-miR-451a hsa-miR-454-5p hsa-miR-548e-3p hsa-miR-548k hsa-miR-628-5p hsa-miR-769-5p hsa-miR-93-3p hsa-miR-942-5p…	hsa-let-7d-3p.iso.t5:0.seed:0.t3:t.ad:0.mm:0 hsa-let-7d-3p.iso.t5:0.seed:0.t3:t.ad:A.mm:0 hsa-let-7d-3p.iso.t5:c.seed:0.t3:0.ad:0.mm:0 hsa-let-7d-3p.ref.t5:0.seed:0.t3:0.ad:0.mm:0 hsa-miR-101-3p.iso.t5:0.seed:0.t3:0.ad:C.mm:0 hsa-miR-101-3p.iso.t5:0.seed:0.t3:0.ad:TT.mm:0 hsa-miR-101-5p.iso.t5:0.seed:0.t3:t.ad:0.mm:0 hsa-miR-106b-3p.iso.t5:0.seed:0.t3:0.ad:AA.mm:0 hsa-miR-106b-3p.iso.t5:0.seed:0.…
B cells (CD19+)	hsa-miR-151a-3p hsa-miR-151a-5p hsa-miR-151b hsa-miR-195-5p hsa-miR-30a-5p hsa-miR-486-3p hsa-miR-3150b-3p hsa-miR-138-5p hsa-miR-5196-3p hsa-miR-577	hsa-miR-151a-3p.iso.t5:0.seed:0.t3:0.ad:T.mm:0 hsa-miR-151a-3p.iso.t5:0.seed:0.t3:A.ad:0.mm:0 hsa-miR-151a-3p.iso.t5:0.seed:0.t3:A.ad:A.mm:0 hsa-miR-151a-3p.iso.t5:0.seed:0.t3:A.ad:AA.mm:0 hsa-miR-151a-3p.iso.t5:0.seed:0.t3:A.ad:T.mm:0 hsa-miR-151a-3p.iso.t5:0.seed:0.t3:g.ad:0.mm:0 hsa-miR-151a-3p.iso.t5:0.seed:0.t3:g.ad:A.mm:0 hsa-miR-151a-3p.iso.t5:0.seed:0.t3:g.ad:AA.mm:0 hsa-miR-151a-3p.iso.t…
T helper cells (CD4+)	hsa-let-7e-5p hsa-miR-125a-5p hsa-miR-125b-2-3p hsa-miR-125b-5p hsa-miR-509-3p hsa-miR-99a-5p hsa-miR-99b-5p	hsa-let-7e-5p.ref.t5:0.seed:0.t3:0.ad:0.mm:0 hsa-miR-125a-5p.iso.t5:0.seed:0.t3:ga.ad:0.mm:0 hsa-miR-125a-5p.iso.t5:0.seed:0.t3:tga.ad:0.mm:0 hsa-miR-125b-5p.ref.t5:0.seed:0.t3:0.ad:0.mm:0 hsa-miR-21-3p.iso.t5:0.seed:0.t3:t.ad:A.mm:0 hsa-miR-21-5p.iso.t5:0.seed:0.t3:a.ad:T.mm:0 hsa-miR-21-5p.iso.t5:0.seed:0.t3:ga.ad:0.mm:0 hsa-miR-21-5p.iso.t5:0.seed:0.t3:ga.ad:A.mm:0 hsa-let-7e-5p.iso.t5:0.seed:…
NK cells (CD56+)	hsa-miR-106a-5p hsa-miR-10a-5p hsa-miR-152-3p hsa-miR-181a-2-3p hsa-miR-181a-5p hsa-miR-181b-5p hsa-miR-20b-5p hsa-miR-22-5p hsa-miR-330-5p hsa-miR-363-3p hsa-miR-1287-5p hsa-miR-133a-3p hsa-miR-181b-2-3p hsa-miR-18b-5p hsa-miR-212-3p hsa-miR-4772-5p hsa-miR-548j-5p hsa-miR-873-3p hsa-miR-873-5p	hsa-miR-106a-5p.ref.t5:0.seed:0.t3:0.ad:0.mm:0 hsa-miR-10a-5p.iso.t5:0.seed:0.t3:0.ad:A.mm:0 hsa-miR-10a-5p.iso.t5:0.seed:0.t3:g.ad:0.mm:0 hsa-miR-10a-5p.iso.t5:0.seed:0.t3:T.ad:0.mm:0 hsa-miR-10a-5p.iso.t5:0.seed:0.t3:tg.ad:0.mm:0 hsa-miR-10a-5p.iso.t5:t.seed:0.t3:0.ad:0.mm:0 hsa-miR-10a-5p.iso.t5:t.seed:0.t3:0.ad:A.mm:0 hsa-miR-10a-5p.iso.t5:t.seed:0.t3:g.ad:0.mm:0 hsa-miR-10a-5p.iso.t5:t.seed:…
Cytotoxic T cells (CD8+)	hsa-miR-335-3p hsa-miR-335-5p hsa-miR-196a-5p	hsa-miR-335-3p.ref.t5:0.seed:0.t3:0.ad:0.mm:0 hsa-miR-335-5p.iso.t5:0.seed:0.t3:gt.ad:0.mm:0 hsa-miR-335-5p.iso.t5:0.seed:0.t3:t.ad:0.mm:0 hsa-miR-335-3p.iso.t5:0.seed:0.t3:c.ad:T.mm:0 hsa-miR-335-3p.iso.t5:0.seed:0.t3:c.ad:0.mm:0

## Sheet: Supplementary Table S5
Supplementary table S5. Characteristics of novel miRNA candidates.
Precursor name	Averaged Z score (novo-miRank)	Precursor chromosome	Precursor strand	Precursor genomic start	Precursor genomic stop	Precursor sequence	Precursor sequence length	Precursor percentage A	Precursor percentage C	Precursor percentage U	Precursor percentage G	Precursor MFE	Precursor structure	Precursor overlapped gene (ensembl id)	Biotype of precursor overlapped gene	Precursor intronic	Precursor UTR	Precursor integenic	Novel 5p name	Novel 5p genomic start	Novel 5p genomic stop	Novel 5p sequence	Novel 5p sequence length	Novel 5p percentage A	Novel 5p percentage C	Novel 5p percentage U	Novel 5p percentage G	Novel 5p MFE	Novel 3p name	Novel 3p genomic start	Novel 3p genomic stop	Novel 3p sequence	Novel 3p sequence length	Novel 3p percentage A	Novel 3p percentage C	Novel 3p percentage U	Novel 3p percentage G	Novel 3p MFE	novel miRNA with the same seed as in hominidae taxomonic family
novel-mir-candidate-70	0.582	chr12	-	52590997	52591061	UUGUUGAACUAGGGCAGGAUCCUUUCUGUCCAGAAGAAAAGGGACCUGCCCUAGUUCAGUAGGAU	65	0.261538	0.2	0.261538	0.276923	-35.1	((((((((((((((((((.((((((((.......))))..))))))))))))))))))))))...	ENSG00000170486	protein_coding	yes	no	no	novel-mir-candidate-70-5p	52591039	52591061	UUGUUGAACUAGGGCAGGAUCCU	23	0.217391	0.173913	0.304348	0.304348	-1.1	novel-mir-candidate-70-3p	52590997	52591018	ACCUGCCCUAGUUCAGUAGGAU	22	0.227273	0.272727	0.272727	0.227273	-4.6	ptr-miR-653_MIMAT0008303
novel-mir-candidate-54	0.6588	chr11	+	3841758	3841821	UUGCGCUCGGAGCUUUGACUUGAGAAUCCAUAUCCUUCGUUCAGCACAAAGUUUCUGAGCGCCU	64	0.203125	0.265625	0.3125	0.21875	-22.4	..(((((((((((((((..(((((...............)))))..))))).))))))))))..			no	no	yes	novel-mir-candidate-54-5p	3841758	3841780	UUGCGCUCGGAGCUUUGACUUGA	23	0.130435	0.217391	0.347826	0.304348	-1	novel-mir-candidate-54-3p	3841799	3841821	CAGCACAAAGUUUCUGAGCGCCU	23	0.26087	0.304348	0.217391	0.217391	-0.5
novel-mir-candidate-332	0.6596	chr22	-	37589228	37589290	AAUGGACAUUUCCCUGAAGGCCUGUACCUGUUGAUUUUGGCCUUCAGGAAAAUGUCCAUUUAA	63	0.253968	0.206349	0.333333	0.206349	-33.4	(((((((((((.((((((((((................)))))))))).)))))))))))...			no	no	yes	novel-mir-candidate-332-5p	37589268	37589290	AAUGGACAUUUCCCUGAAGGCCU	23	0.26087	0.26087	0.26087	0.217391	-1.1	novel-mir-candidate-332-3p	37589228	37589250	CCUUCAGGAAAAUGUCCAUUUAA	23	0.347826	0.217391	0.304348	0.130435	-1.8
novel-mir-candidate-390	0.6719	chr9	-	35096058	35096110	UGUUCACAUGUACAGGCAGCAUUAGCAUUUCCUGCCUGUACAUGUGAACGUUC	53	0.226415	0.245283	0.320755	0.207547	-31.4	.((((((((((((((((((............))))))))))))))))))....	ENSG00000165282	protein_coding	yes	no	no	novel-mir-candidate-390-5p	35096089	35096110	UGUUCACAUGUACAGGCAGCAU	22	0.272727	0.227273	0.272727	0.227273	0	novel-mir-candidate-390-3p	35096058	35096079	CUGCCUGUACAUGUGAACGUUC	22	0.181818	0.272727	0.318182	0.227273	0
novel-mir-candidate-263	0.675	chr8	-	76934543	76934600	CGUAACAUUCCACAGGCUGCUAGCAGCUAUAGAUGGCUGCCUGUGGCAUGUUACAGAU	58	0.241379	0.241379	0.258621	0.258621	-29.3	.(((((((.((((((((.((((...........)))).)))))))).)))))))....			no	no	yes	novel-mir-candidate-263-5p	76934579	76934600	CGUAACAUUCCACAGGCUGCUA	22	0.272727	0.318182	0.227273	0.181818	0	novel-mir-candidate-263-3p	76934543	76934564	CUGCCUGUGGCAUGUUACAGAU	22	0.181818	0.227273	0.318182	0.272727	-4
novel-mir-candidate-32	0.7041	chrX	+	129790440	129790500	CUGAGUUUACAGAUGAGGAGUAAGUAACCCUUGGGCCUUACUCCUCAUUUGUAAACUCAGG	61	0.262295	0.213115	0.295082	0.229508	-40	((((((((((((((((((((((((...((...))..)))))))))))))))))))))))).	ENSG00000122122	protein_coding	yes	no	no	novel-mir-candidate-32-5p	129790440	129790462	CUGAGUUUACAGAUGAGGAGUAA	23	0.347826	0.0869565	0.26087	0.304348	-1	novel-mir-candidate-32-3p	129790478	129790500	UACUCCUCAUUUGUAAACUCAGG	23	0.26087	0.26087	0.347826	0.130435	0
novel-mir-candidate-404	0.713	chr1	+	168521073	168521129	CUGAGUGCACGUGAUUGAGUUCAUCACUCUCCACUGAGAACUCUUCCAAUGUGCACU	57	0.22807	0.280702	0.298246	0.192982	-22.2	...(((((((((....((((((.(((........))))))))).....)))))))))			no	no	yes	novel-mir-candidate-404-5p	168521073	168521094	CUGAGUGCACGUGAUUGAGUUC	22	0.181818	0.181818	0.318182	0.318182	-0.9	novel-mir-candidate-404-3p	168521109	168521129	AGAACUCUUCCAAUGUGCACU	21	0.285714	0.285714	0.285714	0.142857	0
novel-mir-candidate-269	0.7317	chr14	-	60036397	60036454	UCUCUGGUCUGGAAGAUUCCUCAGUCUGGAGGAGGAAUCUUCUAGACUGGAAGAGCUA	58	0.241379	0.189655	0.275862	0.293103	-32.1	((((((((((((((((((((((.........))))))))))))))))))).)))....	ENSG00000131951, ENSG00000258553	protein_coding, antisense	yes	no	no	novel-mir-candidate-269-5p	60036434	60036454	UCUCUGGUCUGGAAGAUUCCU	21	0.142857	0.238095	0.380952	0.238095	-1.8	novel-mir-candidate-269-3p	60036397	60036418	AUCUUCUAGACUGGAAGAGCUA	22	0.318182	0.181818	0.272727	0.227273	-5.3
novel-mir-candidate-65	0.7474	chr4	-	48220122	48220183	AGAUGGGGAGAACUCAAUCCUAAAUGUAUUUAGGAAUUUAAGAUUGAGUUCUCCCCAUCUCC	62	0.306452	0.193548	0.306452	0.193548	-36.2	(((((((((((((((((((.(((((..........))))).)))))))))))))))))))..	ENSG00000135605	protein_coding	yes	no	no	novel-mir-candidate-65-5p	48220162	48220183	AGAUGGGGAGAACUCAAUCCUA	22	0.363636	0.181818	0.181818	0.272727	-4.1	novel-mir-candidate-65-3p	48220122	48220143	AGAUUGAGUUCUCCCCAUCUCC	22	0.181818	0.363636	0.318182	0.136364	-0.4
novel-mir-candidate-13	0.7521	chr16	+	50796264	50796324	CACUGGCAAAAGGGUUUAGAACUUGACUGCCCUAUAAAGAGUUCUUCCUCUGUGCCAUAGG	61	0.262295	0.229508	0.278689	0.229508	-16.3	...(((((..((((...(((((((..............)))))))..)))).)))))....	ENSG00000083799, ENSG00000260616	protein_coding, antisense	yes	no	no	novel-mir-candidate-13-5p	50796264	50796287	CACUGGCAAAAGGGUUUAGAACUU	24	0.333333	0.166667	0.25	0.25	0	novel-mir-candidate-13-3p	50796302	50796324	GAGUUCUUCCUCUGUGCCAUAGG	23	0.130435	0.26087	0.347826	0.26087	-1.3
novel-mir-candidate-413	0.753	chr17	+	42311190	42311258	AAGGGAGGCUGGGGUUCAUUUUCGAGUAGUAUUUUAUACUUUAGUGAACGUGGACUCCAGACUCUCUGU	69	0.217391	0.15942	0.347826	0.275362	-30.8	.((((((.(((((((((((.((((...(((((...)))))....)))).))))))))))).))))))..	ENSG00000126561	protein_coding	no	yes	no	novel-mir-candidate-413-5p	42311190	42311212	AAGGGAGGCUGGGGUUCAUUUUC	23	0.173913	0.130435	0.304348	0.391304	0	novel-mir-candidate-413-3p	42311236	42311258	AACGUGGACUCCAGACUCUCUGU	23	0.217391	0.304348	0.26087	0.217391	-1.7
novel-mir-candidate-348	0.763	chr10	-	124007365	124007426	UCAGGCCUAGCGUUGUCUUCAGACCUUCAAAUUUGAAGGUUAAGUGACCACAGGCCUCAUUC	62	0.241935	0.258065	0.290323	0.209677	-23	..((((((...((.(((....((((((((....))))))))....))).)))))))).....			no	no	yes	novel-mir-candidate-348-5p	124007401	124007426	UCAGGCCUAGCGUUGUCUUCAGACCU	26	0.153846	0.307692	0.307692	0.230769	-1.5	novel-mir-candidate-348-3p	124007365	124007387	UUAAGUGACCACAGGCCUCAUUC	23	0.26087	0.304348	0.26087	0.173913	-1.3
novel-mir-candidate-228	0.7631	chrX	-	928706	928767	CAGAGGAACUGUGGUUAGAGAAAAGCUUGAUAGCUUUUCUCUAACCACAGUUCCUCUGAGCA	62	0.290323	0.209677	0.274194	0.225806	-49.4	(((((((((((((((((((((((((((....)))))))))))))))))))))))))))....			no	no	yes	novel-mir-candidate-228-5p	928746	928767	CAGAGGAACUGUGGUUAGAGAA	22	0.363636	0.0909091	0.181818	0.363636	-0.8	novel-mir-candidate-228-3p	928706	928728	UCUAACCACAGUUCCUCUGAGCA	23	0.26087	0.347826	0.26087	0.130435	-2.2
novel-mir-candidate-26	0.7638	chr9	-	32456304	32456370	AAAAGCUGUCCACUGUAGAGUUGCUGUAUGUAGCAAUGUGUAUCCACUCUACAGUGGUCAGCUUUUA	67	0.253731	0.19403	0.328358	0.223881	-34.5	((((((((.(((((((((((((((((....)))))..........)))))))))))).)))))))).	ENSG00000107201	protein_coding	no	yes	no	novel-mir-candidate-26-5p	32456350	32456370	AAAAGCUGUCCACUGUAGAGU	21	0.333333	0.190476	0.238095	0.238095	0	novel-mir-candidate-26-3p	32456304	32456325	ACUCUACAGUGGUCAGCUUUUA	22	0.227273	0.227273	0.363636	0.181818	0	ptr-miR-320a_MIMAT0008093
novel-mir-candidate-216	0.7657	chr6	+	150377637	150377701	UAGAAGCUGUGGAAACUGCCAAGUCAUGCAUUUAGACUGCUUUCAGUUUUUACAAGUGCUGAAUG	65	0.276923	0.169231	0.323077	0.230769	-16.3	....((((((((((((((...((((.........)))).....)))))))))))...))).....	ENSG00000009765	protein_coding	yes	no	no	novel-mir-candidate-216-5p	150377637	150377655	UAGAAGCUGUGGAAACUGC	19	0.315789	0.157895	0.210526	0.315789	-1.3	novel-mir-candidate-216-3p	150377680	150377701	CAGUUUUUACAAGUGCUGAAUG	22	0.272727	0.136364	0.363636	0.227273	-2.2
novel-mir-candidate-380	0.7668	chr18	-	20983507	20983565	UAAUAUGAAAGUCUAGCCGCUAGAUUUUCAAGCCUAGCUGCUAGGCUUUCAUAUUAUAC	59	0.288136	0.20339	0.338983	0.169492	-30.5	(((((((((((((((((.(((((..........))))).)))))))))))))))))...	ENSG00000067900	protein_coding	yes	no	no	novel-mir-candidate-380-5p	20983544	20983565	UAAUAUGAAAGUCUAGCCGCUA	22	0.363636	0.181818	0.272727	0.181818	0	novel-mir-candidate-380-3p	20983507	20983528	CUGCUAGGCUUUCAUAUUAUAC	22	0.227273	0.227273	0.409091	0.136364	0
novel-mir-candidate-359	0.7748	chr14	+	105897944	105898004	CUGUGUCACUGUGGGAGUAGCAGCUACCACCACUACAAUAUCCUCACAGUGACACGAGCCC	61	0.262295	0.327869	0.196721	0.213115	-24.7	.(((((((((((((((((((............))))....))).)))))))))))).....	ENSG00000211918	IG_D_gene	no	no	no	novel-mir-candidate-359-5p	105897944	105897965	CUGUGUCACUGUGGGAGUAGCA	22	0.181818	0.181818	0.272727	0.363636	-2.5	novel-mir-candidate-359-3p	105897982	105898004	UAUCCUCACAGUGACACGAGCCC	23	0.26087	0.391304	0.173913	0.173913	-0.2
novel-mir-candidate-186	0.8024	chrX	+	928709	928768	UCAGAGGAACUGUGGUUAGAGAAAAGCUAUCAAGCUUUUCUCUAACCACAGUUCCUCUGA	60	0.3	0.216667	0.283333	0.2	-49.8	((((((((((((((((((((((((((((....))))))))))))))))))))))))))))			no	no	yes	novel-mir-candidate-186-5p	928709	928731	UCAGAGGAACUGUGGUUAGAGAA	23	0.347826	0.0869565	0.217391	0.347826	-1.1	novel-mir-candidate-186-3p	928747	928768	UCUCUAACCACAGUUCCUCUGA	22	0.227273	0.363636	0.318182	0.0909091	-1.2
novel-mir-candidate-89	0.8044	chr9	+	37804229	37804285	GUUAGCCAGAGUUCCUAAAGAAAAUAGUCCCAGUUUCUUCAGGAACUCUGGCUAACU	57	0.298246	0.22807	0.280702	0.192982	-33.1	((((((((((((((((.((((((..........)))))).)))))))))))))))).	ENSG00000255872, ENSG00000122741	protein_coding, protein_coding	yes	no	no	novel-mir-candidate-89-5p	37804229	37804251	GUUAGCCAGAGUUCCUAAAGAAA	23	0.391304	0.173913	0.217391	0.217391	0	novel-mir-candidate-89-3p	37804264	37804285	UCUUCAGGAACUCUGGCUAACU	22	0.227273	0.272727	0.318182	0.181818	-1.7
novel-mir-candidate-131	0.8051	chr7	-	92682469	92682534	GACCGUAAGGAUACAAUGAUUGAGAUGCAAUGUAAGUGCUGCAAUCAUUUAUGCUUGCGGAGGACU	66	0.30303	0.151515	0.272727	0.272727	-22.8	..(((((((.(((.((((((((....(((.......)))..))))))))))).)))))))......	ENSG00000105810	protein_coding	yes	no	no	novel-mir-candidate-131-5p	92682512	92682534	GACCGUAAGGAUACAAUGAUUGA	23	0.391304	0.130435	0.217391	0.26087	-1.1	novel-mir-candidate-131-3p	92682469	92682491	AUCAUUUAUGCUUGCGGAGGACU	23	0.217391	0.173913	0.347826	0.26087	0
novel-mir-candidate-221	0.817	chr14	-	54843317	54843375	AAUUAGUUCCUGGUGUUGUUUACGAGUGUAUUCUCGUGUCAACAUACAGGGAUUUAGAC	59	0.237288	0.152542	0.372881	0.237288	-22.8	....((((((((((((((..((((((......)))))).)))))).)))))))).....	ENSG00000131979	protein_coding	yes	yes	no	novel-mir-candidate-221-5p	54843351	54843375	AAUUAGUUCCUGGUGUUGUUUACGA	25	0.2	0.12	0.44	0.24	-0.2	novel-mir-candidate-221-3p	54843317	54843339	UGUCAACAUACAGGGAUUUAGAC	23	0.347826	0.173913	0.26087	0.217391	0	ptr-miR-505_MIMAT0008178
novel-mir-candidate-152	0.8206	chr1	-	169848261	169848317	CCUGGUAAUAUACAUUUACUGAGGUUUUAAAAUUCAGUAGAUGUGUAUUGCCAGGCC	57	0.280702	0.157895	0.350877	0.210526	-33	(((((((((((((((((((((((.........)))))))))))))))))))))))..	ENSG00000000460	protein_coding	yes	no	no	novel-mir-candidate-152-5p	169848296	169848317	CCUGGUAAUAUACAUUUACUGA	22	0.318182	0.181818	0.363636	0.136364	-2	novel-mir-candidate-152-3p	169848261	169848282	AGUAGAUGUGUAUUGCCAGGCC	22	0.227273	0.181818	0.272727	0.318182	0
novel-mir-candidate-226	0.8222	chr12	-	628274	628341	UCUGAGAUCUCUAUGAGGAGGCUUCCCCCUUCCCCUCUAGGAAGACUCCUCAUAGAGAUCUCAGAGUA	68	0.235294	0.294118	0.264706	0.205882	-43.1	((((((((((((((((((((.(((((.............))))).))))))))))))))))))))...	ENSG00000171840	protein_coding	yes	no	no	novel-mir-candidate-226-5p	628318	628341	UCUGAGAUCUCUAUGAGGAGGCUU	24	0.208333	0.166667	0.333333	0.291667	-4.8	novel-mir-candidate-226-3p	628274	628295	UCCUCAUAGAGAUCUCAGAGUA	22	0.318182	0.227273	0.272727	0.181818	-1.8
novel-mir-candidate-77	0.8252	chr19	+	51391445	51391503	UACUGUCCAGGUUCUUGUGAUAUUACUUGUGUAUUAGUAGACACAGAAUCUGGACCACA	59	0.271186	0.186441	0.338983	0.20339	-22.4	....(((((((((((.(((...(((((........))))).))))))))))))))....			no	no	yes	novel-mir-candidate-77-5p	51391445	51391467	UACUGUCCAGGUUCUUGUGAUAU	23	0.173913	0.173913	0.434783	0.217391	-2.2	novel-mir-candidate-77-3p	51391482	51391503	UAGACACAGAAUCUGGACCACA	22	0.409091	0.272727	0.136364	0.181818	-0.4
novel-mir-candidate-179	0.8259	chr1	+	231919617	231919677	GCUGAGACUGGACAGAAAGACCUUUUUUCUGAUAAGCUCUUAAUCUGUAUCAGGCUCAGCC	61	0.262295	0.229508	0.295082	0.213115	-22.3	((((((.(((((((((((((.(((.........))).))))..))))).)))).)))))).	ENSG00000162946	protein_coding	yes	no	no	novel-mir-candidate-179-5p	231919617	231919636	GCUGAGACUGGACAGAAAGA	20	0.4	0.15	0.1	0.35	-1.1	novel-mir-candidate-179-3p	231919655	231919677	CUUAAUCUGUAUCAGGCUCAGCC	23	0.217391	0.304348	0.304348	0.173913	-1.5
novel-mir-candidate-412	0.8263	chr1	+	101249756	101249816	GUUCGGGGCAACAAACUACUAGUGUCACUAGUUAGCUGCCAGUAGUUAGCUGCUCUGAACA	61	0.262295	0.229508	0.262295	0.245902	-22.4	((((((((((...(((((((.((((.........)).)).)))))))...)))))))))).			no	no	yes	novel-mir-candidate-412-5p	101249756	101249778	GUUCGGGGCAACAAACUACUAGU	23	0.304348	0.217391	0.217391	0.26087	0	novel-mir-candidate-412-3p	101249794	101249816	CCAGUAGUUAGCUGCUCUGAACA	23	0.26087	0.26087	0.26087	0.217391	-4.1
novel-mir-candidate-174	0.8273	chr6	-	637888	637948	UUUGGUACUGACUGUCUAGCAUUCUUAUAUUUUCAGCCAAUGCUUGUCUCAGUUGGUACUA	61	0.196721	0.196721	0.42623	0.180328	-17.8	..((((((((((((...((((((...............)))))).....))))))))))))	ENSG00000112685	protein_coding	yes	no	no	novel-mir-candidate-174-5p	637928	637948	UUUGGUACUGACUGUCUAGCA	21	0.190476	0.190476	0.380952	0.238095	-1.1	novel-mir-candidate-174-3p	637888	637911	CAAUGCUUGUCUCAGUUGGUACUA	24	0.208333	0.208333	0.375	0.208333	-0.1
novel-mir-candidate-414	0.8332	chr2	-	74539315	74539373	UGCUGAAUCCAGAGAGCAGCAUGAGUUCCUGAAAUGCAGUUCAAUGGUGUUCAGCAGAC	59	0.288136	0.20339	0.237288	0.271186	-23.2	(((((((((((..((((.((((...........)))).))))..))).))))))))...	ENSG00000115318	protein_coding	yes	no	no	novel-mir-candidate-414-5p	74539352	74539373	UGCUGAAUCCAGAGAGCAGCAU	22	0.318182	0.227273	0.181818	0.272727	-5.7	novel-mir-candidate-414-3p	74539315	74539337	CAGUUCAAUGGUGUUCAGCAGAC	23	0.26087	0.217391	0.26087	0.26087	0
novel-mir-candidate-252	0.8342	chr4	+	75973883	75973940	ACAUAAACUGCAUGCCUGCACAUCACUGCAUGCCUGGUGUGCAGGCAUGCAGUUUAUG	58	0.241379	0.258621	0.258621	0.241379	-41.4	.((((((((((((((((((((((((.........))))))))))))))))))))))))	ENSG00000198301	protein_coding	yes	no	no	novel-mir-candidate-252-5p	75973883	75973904	ACAUAAACUGCAUGCCUGCACA	22	0.363636	0.318182	0.181818	0.136364	-2.5	novel-mir-candidate-252-3p	75973919	75973940	GUGUGCAGGCAUGCAGUUUAUG	22	0.181818	0.136364	0.318182	0.363636	-3.5
novel-mir-candidate-98	0.8348	chr12	+	11250745	11250801	GUUACAAGCCCAGUAUGCAUUAGGUAUUUGUCCUAAUGCAUGCUGGGCUUGUAACCU	57	0.22807	0.210526	0.333333	0.22807	-43.2	((((((((((((((((((((((((.......))))))))))))))))))))))))..	ENSG00000275119	lincRNA	yes	no	no	novel-mir-candidate-98-5p	11250745	11250767	GUUACAAGCCCAGUAUGCAUUAG	23	0.304348	0.217391	0.26087	0.217391	0	novel-mir-candidate-98-3p	11250779	11250801	AAUGCAUGCUGGGCUUGUAACCU	23	0.217391	0.217391	0.304348	0.26087	-3.1	ppy-miR-33b_MIMAT0015740
novel-mir-candidate-86	0.8353	chr3	+	187746441	187746501	CCCCCUUGGACUUUUGCUGAAGUGUGUCUCUCCUGCACUUCAGAGAAAUGUUCAAAGGAUU	61	0.213115	0.245902	0.327869	0.213115	-22.4	..((.((((((((((.((((((((((.......)))))))))).)))).)))))).))...			no	no	yes	novel-mir-candidate-86-5p	187746441	187746462	CCCCCUUGGACUUUUGCUGAAG	22	0.136364	0.318182	0.318182	0.227273	-0.1	novel-mir-candidate-86-3p	187746478	187746501	CUUCAGAGAAAUGUUCAAAGGAUU	24	0.375	0.125	0.291667	0.208333	0
novel-mir-candidate-368	0.8442	chr1	+	178743554	178743611	AUUGAUGUUGCCAUGGAACUAAUUUAAGUUAAAAAAAUUAGUUCUGUGGCAACAUCGA	58	0.362069	0.12069	0.327586	0.189655	-32.1	.((((((((((((((((((((((((.........))))))))))))))))))))))))	ENSG00000116191	protein_coding	yes	no	no	novel-mir-candidate-368-5p	178743554	178743575	AUUGAUGUUGCCAUGGAACUAA	22	0.318182	0.136364	0.318182	0.227273	-0.9	novel-mir-candidate-368-3p	178743592	178743611	UAGUUCUGUGGCAACAUCGA	20	0.25	0.2	0.3	0.25	-1.3
novel-mir-candidate-37	0.8468	chr3	+	52393954	52394014	UGGCUCAAGGUUCAAGAAGGCCAAUGUUGUGAGCACAGGCCUUCUCGAGCCUUGAGUGUGC	61	0.213115	0.229508	0.245902	0.311475	-35.1	..(((((((((((.((((((((..((((...))))..)))))))).)))))))))))....	ENSG00000114841	protein_coding	yes	no	no	novel-mir-candidate-37-5p	52393954	52393974	UGGCUCAAGGUUCAAGAAGGC	21	0.285714	0.190476	0.190476	0.333333	0	novel-mir-candidate-37-3p	52393992	52394014	GCCUUCUCGAGCCUUGAGUGUGC	23	0.0869565	0.304348	0.304348	0.304348	-3.3
novel-mir-candidate-219	0.847	chr2	-	127846491	127846553	AAGUGCUUUAUUUGGAAGGAGGGAGUCAUCCACUCUUGAGCCACUGCAGUGAAGUCACUUGAU	63	0.253968	0.190476	0.285714	0.269841	-20.2	(((((((((((((((.((((((((....))).)))))...)))....))))))).)))))...	ENSG00000144231	protein_coding	no	yes	no	novel-mir-candidate-219-5p	127846538	127846553	AAGUGCUUUAUUUGGA	16	0.25	0.0625	0.4375	0.25	0	novel-mir-candidate-219-3p	127846491	127846511	ACUGCAGUGAAGUCACUUGAU	21	0.285714	0.190476	0.285714	0.238095	-2.4	ggo-miR-17-3p_MIMAT0002659
novel-mir-candidate-155	0.8478	chr8	+	95228639	95228701	UUUGGCAGAUUUCUGAGCCUAGAGACAGAGCACAGGCUUCUCUGGCCCGUGAUCUCUGCCCUG	63	0.174603	0.285714	0.269841	0.269841	-25.5	...((((((..((((.(((.(((((...(((....))))))))))).)).))..))))))...	ENSG00000253773	lincRNA	yes	no	no	novel-mir-candidate-155-5p	95228639	95228662	UUUGGCAGAUUUCUGAGCCUAGAG	24	0.208333	0.166667	0.333333	0.291667	-2.9	novel-mir-candidate-155-3p	95228677	95228701	UCUCUGGCCCGUGAUCUCUGCCCUG	25	0.04	0.4	0.32	0.24	-1.7
novel-mir-candidate-109	0.8515	chr2	-	171409110	171409177	GACUUAAUCUCAACUUCAAGUCCCGGCUUAGCCACCUAUUAAGUGACUUGAACUUGGGACUAAGCCUG	68	0.264706	0.264706	0.279412	0.191176	-21.4	..((((.((((((.((((((((...((((((.......)))))))))))))).)))))).))))....	ENSG00000123600	protein_coding	yes	no	no	novel-mir-candidate-109-5p	171409156	171409177	GACUUAAUCUCAACUUCAAGUC	22	0.318182	0.272727	0.318182	0.0909091	-1.2	novel-mir-candidate-109-3p	171409110	171409131	CUUGAACUUGGGACUAAGCCUG	22	0.227273	0.227273	0.272727	0.272727	-1.6
novel-mir-candidate-119	0.8561	chr20	+	299505	299563	UCCUGCUGGAAAGAACCUGAGAGUUGGUUUGGACCAAUUCCCUGGUUUUCCAGCAGAUG	59	0.220339	0.220339	0.288136	0.271186	-29	..((((((((..(((((...((((((((....))))))))...)))))))))))))...	ENSG00000247315	protein_coding	no	yes	no	novel-mir-candidate-119-5p	299505	299528	UCCUGCUGGAAAGAACCUGAGAGU	24	0.291667	0.208333	0.208333	0.291667	-2.5	novel-mir-candidate-119-3p	299541	299563	AUUCCCUGGUUUUCCAGCAGAUG	23	0.173913	0.26087	0.347826	0.217391	-4.2
novel-mir-candidate-399	0.8579	chr4	+	15717842	15717898	UUUUGCAGAAUGGUGCUUGUGCUGUGUACUGAAGAGCACUUGUGCAGUUCUGAUAAU	57	0.210526	0.140351	0.368421	0.280702	-18.8	.....((((((.((((..(((((...........)))))..)))).)))))).....	ENSG00000109743	protein_coding	yes	no	no	novel-mir-candidate-399-5p	15717842	15717864	UUUUGCAGAAUGGUGCUUGUGCU	23	0.130435	0.130435	0.434783	0.304348	-3.2	novel-mir-candidate-399-3p	15717877	15717898	GCACUUGUGCAGUUCUGAUAAU	22	0.227273	0.181818	0.363636	0.227273	-1.7
novel-mir-candidate-67	0.8665	chr1	-	147158151	147158208	CACUGAAUUCCAUUUGUGGACUGAAAAGUAUUCAAUCCACUUUUGGGGUUCAGAGAUA	58	0.293103	0.172414	0.327586	0.206897	-24	..((((((((((...(((((.((((.....)))).)))))...)))))))))).....	ENSG00000131791	protein_coding	no	yes	no	novel-mir-candidate-67-5p	147158186	147158208	CACUGAAUUCCAUUUGUGGACUG	23	0.217391	0.217391	0.347826	0.217391	-2.5	novel-mir-candidate-67-3p	147158151	147158173	UCCACUUUUGGGGUUCAGAGAUA	23	0.217391	0.173913	0.347826	0.26087	-1.8
novel-mir-candidate-403	0.867	chr4	-	6681841	6681900	UCUGGAUGGCAGCUGGGAACGUCUUCUUUUAAUGAGGGCUCCCCUCUUCCAUCCACAGUC	60	0.166667	0.3	0.3	0.233333	-25.1	..(((((((.((..((((..((((((.......))))))))))..)).))))))).....			no	no	yes	novel-mir-candidate-403-5p	6681880	6681900	UCUGGAUGGCAGCUGGGAACG	21	0.190476	0.190476	0.190476	0.428571	-1.2	novel-mir-candidate-403-3p	6681841	6681861	UCCCCUCUUCCAUCCACAGUC	21	0.142857	0.52381	0.285714	0.047619	0
novel-mir-candidate-99	0.8697	chr17	+	75489180	75489238	AUCUGGCAGAGAGGCCCAGAAUCCUCCCAAGGUGUAGGUUUCUAGCCUCUCUGCCAAGU	59	0.220339	0.288136	0.237288	0.254237	-30.4	...((((((((((((..((((.(((((...))...))).)))).))))))))))))...	ENSG00000177728	protein_coding	yes	no	no	novel-mir-candidate-99-5p	75489180	75489201	AUCUGGCAGAGAGGCCCAGAAU	22	0.318182	0.227273	0.136364	0.318182	-5.8	novel-mir-candidate-99-3p	75489217	75489238	GUUUCUAGCCUCUCUGCCAAGU	22	0.136364	0.318182	0.363636	0.181818	0
novel-mir-candidate-100	0.8713	chr14	+	24435095	24435158	GAAUCAGAAUUACUGAAUGGAGCCCAGGCAUUUUUUAAAAAAGUUCCCUUGGUAAUUCUGUUCC	64	0.296875	0.1875	0.328125	0.1875	-18.2	(((.((((((((((((..(((((...................))))).))))))))))))))).	ENSG00000100441	protein_coding	yes	no	no	novel-mir-candidate-100-5p	24435095	24435119	GAAUCAGAAUUACUGAAUGGAGCCC	25	0.36	0.2	0.2	0.24	-2.3	novel-mir-candidate-100-3p	24435137	24435158	GUUCCCUUGGUAAUUCUGUUCC	22	0.0909091	0.272727	0.454545	0.181818	0
novel-mir-candidate-445	0.8741	chr17	-	2477476	2477523	UCUGCAACCUUUGAGCACUGAUGUGUUGCUCAAAGGCAAUGUGCGUUG	48	0.208333	0.208333	0.3125	0.270833	-16.5	..((((.(((((((((((......)).))))))))).....))))...	ENSG00000127804	protein_coding	yes	no	no	novel-mir-candidate-445-5p	2477499	2477523	UCUGCAACCUUUGAGCACUGAUGUG	25	0.2	0.24	0.32	0.24	-1	novel-mir-candidate-445-3p	2477476	2477497	UGCUCAAAGGCAAUGUGCGUUG	22	0.227273	0.181818	0.272727	0.318182	-2.5
novel-mir-candidate-194	0.8825	chr12	-	54397486	54397554	UGGGGGCCAAGUAUAGGGUAGAAAGAACUUCUGAGCUUUCAUUGACUUCACCCAACUUGCUCCCCAGGU	69	0.246377	0.246377	0.26087	0.246377	-20.7	((((((.(((((...((((.(((........(((....))).....))))))).))))).))))))...	ENSG00000258137, ENSG00000258086, ENSG00000161638	antisense, antisense, protein_coding	yes	no	no	novel-mir-candidate-194-5p	54397532	54397554	UGGGGGCCAAGUAUAGGGUAGAA	23	0.304348	0.0869565	0.173913	0.434783	-2.3	novel-mir-candidate-194-3p	54397486	54397507	UCACCCAACUUGCUCCCCAGGU	22	0.181818	0.454545	0.227273	0.136364	-1.8
novel-mir-candidate-177	0.8849	chr4	+	39238516	39238575	CUGAGCUAGGGAUAUCUCCUGAGAAUGUCUCCUCCCUAUUCUCAGGAAAAAUCCCUAGCU	60	0.25	0.283333	0.283333	0.183333	-31.3	...((((((((((...(((((((((((.........)))))))))))...))))))))))	ENSG00000157796	protein_coding	yes	no	no	novel-mir-candidate-177-5p	39238516	39238539	CUGAGCUAGGGAUAUCUCCUGAGA	24	0.25	0.208333	0.25	0.291667	-4	novel-mir-candidate-177-3p	39238556	39238575	CUCAGGAAAAAUCCCUAGCU	20	0.35	0.3	0.2	0.15	-1.4
novel-mir-candidate-431	0.8863	chr7	+	142474537	142474590	UCGGCUGUGUAUCUCUGUGUCAGAAGCUUAGCCACAGUGUGGCACAGUCGUGUC	54	0.166667	0.240741	0.296296	0.296296	-19.2	.(((((((((....(((((.............)))))....)))))))))....			no	no	yes	novel-mir-candidate-431-5p	142474537	142474558	UCGGCUGUGUAUCUCUGUGUCA	22	0.0909091	0.227273	0.409091	0.272727	-0.8	novel-mir-candidate-431-3p	142474569	142474590	CACAGUGUGGCACAGUCGUGUC	22	0.181818	0.272727	0.227273	0.318182	-4.2
novel-mir-candidate-188	0.8867	chr10	+	20084607	20084665	GCAUAAGGCCAGAGGCUAGUUUAGGCAAGAAGGAAUAAACUAGCCUCUGGCCUUAUACC	59	0.322034	0.220339	0.20339	0.254237	-36.4	..(((((((((((((((((((((............)))))))))))))))))))))...	ENSG00000120594, ENSG00000238246	protein_coding, antisense	yes	no	no	novel-mir-candidate-188-5p	20084607	20084629	GCAUAAGGCCAGAGGCUAGUUUA	23	0.304348	0.173913	0.217391	0.304348	-3.9	novel-mir-candidate-188-3p	20084645	20084665	ACUAGCCUCUGGCCUUAUACC	21	0.190476	0.380952	0.285714	0.142857	-2.3
novel-mir-candidate-406	0.8929	chr22	-	40424378	40424431	AUCUGUUCCCUGGGCUGGAAGUGGAAUCUCACACCAGCUUUGGGUUUCAGUGGG	54	0.166667	0.222222	0.296296	0.314815	-20.1	..(((..(((.(((((((..((((....)))).))))))).)))...)))....	ENSG00000196588	protein_coding	yes	no	no	novel-mir-candidate-406-5p	40424409	40424431	AUCUGUUCCCUGGGCUGGAAGUG	23	0.130435	0.217391	0.304348	0.347826	-1.7	novel-mir-candidate-406-3p	40424378	40424400	CACCAGCUUUGGGUUUCAGUGGG	23	0.130435	0.217391	0.304348	0.347826	-1.9
novel-mir-candidate-112	0.8965	chr5	+	97123432	97123484	GAGACUUCAUUAGGCAUGAAAGUAUCUUCCCAACUUUCAUUCCUAGUGAAGUC	53	0.283019	0.226415	0.320755	0.169811	-25.6	..((((((((((((.((((((((.........)))))))).))))))))))))	ENSG00000251513, ENSG00000145721	lincRNA, protein_coding	yes	no	no	novel-mir-candidate-112-5p	97123432	97123454	GAGACUUCAUUAGGCAUGAAAGU	23	0.347826	0.130435	0.26087	0.26087	-1.4	novel-mir-candidate-112-3p	97123465	97123484	CUUUCAUUCCUAGUGAAGUC	20	0.2	0.25	0.4	0.15	-2.4
novel-mir-candidate-60	0.8994	chr11	-	18004708	18004770	UGUUCUACACAGAUAAUCUGUUAUUAAUGAGAGAAUAGAAUAGACAAUCUGUGUAGAGUGCUU	63	0.349206	0.111111	0.333333	0.206349	-19.6	..((((((((((((..(((((((((........))))..)))))..)))))))))))).....	ENSG00000129158, ENSG00000255448	protein_coding, processed_transcript	yes	no	no	novel-mir-candidate-60-5p	18004748	18004770	UGUUCUACACAGAUAAUCUGUUA	23	0.304348	0.173913	0.391304	0.130435	-3	novel-mir-candidate-60-3p	18004708	18004730	UAGACAAUCUGUGUAGAGUGCUU	23	0.26087	0.130435	0.347826	0.26087	-1.1
novel-mir-candidate-347	0.9079	chr6	+	33201672	33201738	AUGGGAGAGAGAAGGGCUGGUUCUGGAUUGUUGGGAAACUCCACAGUACUUGACCUUGACUCUCCCU	67	0.223881	0.208955	0.268657	0.298507	-27	..(((((((..((((...(((.(((....(((....)))....))).)))...))))..))))))).	ENSG00000112473	protein_coding	yes	no	no	novel-mir-candidate-347-5p	33201672	33201693	AUGGGAGAGAGAAGGGCUGGUU	22	0.272727	0.0454545	0.181818	0.5	0	novel-mir-candidate-347-3p	33201715	33201738	CAGUACUUGACCUUGACUCUCCCU	24	0.166667	0.375	0.333333	0.125	0
novel-mir-candidate-33	0.9196	chr16	+	16144548	16144610	AAACUGUUGGCUUGCAUUAGGGACUGCAGAGUGUGAAGGUGCCUAGUGAAAAGCCAGUAAGGU	63	0.285714	0.142857	0.238095	0.333333	-23.7	...((.(((((((.(((((((.(((.((.....))..))).)))))))..)))))))..))..			no	no	yes	novel-mir-candidate-33-5p	16144548	16144572	AAACUGUUGGCUUGCAUUAGGGACU	25	0.24	0.16	0.32	0.28	-2.1	novel-mir-candidate-33-3p	16144586	16144610	GUGCCUAGUGAAAAGCCAGUAAGGU	25	0.32	0.16	0.2	0.32	-4
novel-mir-candidate-249	0.9237	chr19	+	16367158	16367218	GAAUGAUGGCAUCAAACCAGGUGCCAGGCAUCAUCCUGGCACCUGGUUCGAUGCCAUCAAU	61	0.262295	0.278689	0.213115	0.245902	-46.6	...((((((((((.((((((((((((((......)))))))))))))).))))))))))..	ENSG00000127527	protein_coding	yes	no	no	novel-mir-candidate-249-5p	16367158	16367180	GAAUGAUGGCAUCAAACCAGGUG	23	0.347826	0.173913	0.173913	0.304348	-1.3	novel-mir-candidate-249-3p	16367196	16367218	GCACCUGGUUCGAUGCCAUCAAU	23	0.217391	0.304348	0.26087	0.217391	-3.4
novel-mir-candidate-303	0.9262	chr10	-	102227076	102227131	CAAAGCCAGAGAGCUCUUCCUGGGGAAAGCUUGGAAGAGCUCUCUGACUUCGCCUC	56	0.232143	0.285714	0.214286	0.267857	-30.3	..(((.((((((((((((((.((......)).)))))))))))))).)))......	ENSG00000119915	protein_coding	yes	no	no	novel-mir-candidate-303-5p	102227112	102227131	CAAAGCCAGAGAGCUCUUCC	20	0.3	0.35	0.15	0.2	-1.3	novel-mir-candidate-303-3p	102227076	102227097	AAGAGCUCUCUGACUUCGCCUC	22	0.181818	0.363636	0.272727	0.181818	0
novel-mir-candidate-14	0.9267	chr11	+	66627122	66627186	GUACCCUGACUGUCCCUCUGUAGACUGUUGAGACUGAGUUCCUGUUGGGACAGUCAGUUGGUAUG	65	0.169231	0.215385	0.323077	0.292308	-27.6	((((((((((((((((......((((..........))))......)))))))))))..))))).	ENSG00000239306, ENSG00000248643	protein_coding, protein_coding	yes	yes	no	novel-mir-candidate-14-5p	66627122	66627144	GUACCCUGACUGUCCCUCUGUAG	23	0.130435	0.347826	0.304348	0.217391	0	novel-mir-candidate-14-3p	66627161	66627186	UCCUGUUGGGACAGUCAGUUGGUAUG	26	0.153846	0.153846	0.346154	0.346154	-2.1
novel-mir-candidate-139	0.9269	chr2	+	18605363	18605417	GCAGGUAGUCCUUUUAAGAUGCAAAACCAUAUGCAUCUUAAAAUGACUACCUGCC	55	0.327273	0.236364	0.272727	0.163636	-33.6	((((((((((.((((((((((((........)))))))))))).)))))))))).			no	no	yes	novel-mir-candidate-139-5p	18605363	18605383	GCAGGUAGUCCUUUUAAGAUG	21	0.238095	0.142857	0.333333	0.285714	-1.5	novel-mir-candidate-139-3p	18605397	18605417	AUCUUAAAAUGACUACCUGCC	21	0.333333	0.285714	0.285714	0.0952381	0
novel-mir-candidate-85	0.9292	chr5	+	142926991	142927060	UAAUUGAACUGCUCUAUGCUACUGUUCUUUAAAACAUAGGUAAUAAGAGUAGCACAGAAUAGUUCAGUUG	70	0.342857	0.142857	0.328571	0.185714	-23.6	(((((((((((.(((.(((((((.(((((........)))....)).))))))).))).)))))))))))	ENSG00000145819	protein_coding	yes	no	no	novel-mir-candidate-85-5p	142926991	142927013	UAAUUGAACUGCUCUAUGCUACU	23	0.26087	0.217391	0.391304	0.130435	-1	novel-mir-candidate-85-3p	142927039	142927060	GUAGCACAGAAUAGUUCAGUUG	22	0.318182	0.136364	0.272727	0.272727	0
novel-mir-candidate-125	0.9311	chr8	+	129694534	129694592	CUUCUGGACUUGGCCUGCUUUUCAAUUCUUGCAUUUGAAAGCAGACAGGUCCAGAAUUC	59	0.220339	0.237288	0.338983	0.20339	-27.3	.(((((((((((..(((((((.(((.........)))))))))).)))))))))))...			no	no	yes	novel-mir-candidate-125-5p	129694534	129694556	CUUCUGGACUUGGCCUGCUUUUC	23	0.0434783	0.304348	0.434783	0.217391	-0.4	novel-mir-candidate-125-3p	129694570	129694592	GAAAGCAGACAGGUCCAGAAUUC	23	0.391304	0.217391	0.130435	0.26087	0
novel-mir-candidate-268	0.9318	chr2	+	226851256	226851315	AUGUCUCUGCAUUUGGGGUAUGUGUGGGUUCUAAACACAUACCCCCCCAAUGCAGAGACA	60	0.25	0.25	0.266667	0.233333	-37.9	.((((((((((((.(((((((((((.........)))))))))))...))))))))))))	ENSG00000144468	protein_coding	yes	no	no	novel-mir-candidate-268-5p	226851256	226851278	AUGUCUCUGCAUUUGGGGUAUGU	23	0.130435	0.130435	0.434783	0.304348	-2.2	novel-mir-candidate-268-3p	226851294	226851315	AUACCCCCCCAAUGCAGAGACA	22	0.363636	0.409091	0.0909091	0.136364	0
novel-mir-candidate-158	0.9366	chr3	+	185562143	185562206	UACUGCCACUUGUAGUCUUCCUUCCUUCCUCUUAGGGUAAGGACAGCAACAAGUGGCAGGCUAU	64	0.21875	0.265625	0.296875	0.21875	-30.7	..(((((((((((.((..(((((((((......)))).)))))..)).))))))))))).....			no	no	yes	novel-mir-candidate-158-5p	185562143	185562164	UACUGCCACUUGUAGUCUUCCU	22	0.136364	0.318182	0.409091	0.136364	-2.9	novel-mir-candidate-158-3p	185562182	185562206	AGGACAGCAACAAGUGGCAGGCUAU	25	0.36	0.2	0.12	0.32	-0.8
novel-mir-candidate-69	0.9415	chr5	+	157309985	157310049	AGGGUGCUCUGAGCCCUUUUGUAUCCGCCCUCUGCUGCCAGCUUCAAAAGGGCUCAGAGCACAGC	65	0.184615	0.323077	0.230769	0.261538	-35.3	...((((((((((((((((((.....((........))......))))))))))))))))))...	ENSG00000055163	protein_coding	yes	no	no	novel-mir-candidate-69-5p	157309985	157310006	AGGGUGCUCUGAGCCCUUUUGU	22	0.0909091	0.227273	0.363636	0.318182	-5.7	novel-mir-candidate-69-3p	157310027	157310049	UUCAAAAGGGCUCAGAGCACAGC	23	0.347826	0.26087	0.130435	0.26087	-1
novel-mir-candidate-411	0.9475	chr1	+	33265640	33265702	GGGAGGCAAACUUUGAGCGUGUCUCAGGAGCCUAAAACAUGAGAAGCCUCAGUUUCCCUCUCC	63	0.253968	0.269841	0.222222	0.253968	-21.8	((((((.(((((..(((.((.(((((.............))))).)))))))))).)))))).	ENSG00000160094	protein_coding	yes	no	no	novel-mir-candidate-411-5p	33265640	33265663	GGGAGGCAAACUUUGAGCGUGUCU	24	0.208333	0.166667	0.25	0.375	-3	novel-mir-candidate-411-3p	33265682	33265702	GAAGCCUCAGUUUCCCUCUCC	21	0.142857	0.428571	0.285714	0.142857	-2.6
novel-mir-candidate-38	0.9589	chr8	-	115534466	115534535	ACACCGGGGGUUAGAGCUUCAACCUCCAGUAUGAUGGUAUUGAGGUUAGAGCUUCAACCUCCAGUGUGAU	70	0.242857	0.214286	0.271429	0.271429	-35.3	((((.(((((((.((((((.((((((.(((((....))))))))))).)))))).))))))).))))...	ENSG00000104447	protein_coding	yes	no	no	novel-mir-candidate-38-5p	115534511	115534535	ACACCGGGGGUUAGAGCUUCAACCU	25	0.24	0.28	0.2	0.28	-3.2	novel-mir-candidate-38-3p	115534466	115534490	UUAGAGCUUCAACCUCCAGUGUGAU	25	0.24	0.24	0.32	0.2	-0.2
novel-mir-candidate-376	0.9598	chr2	-	218040991	218041045	GUCCUUUCAGAUGGUUCUCUAGAGAACCAUCUCUAGAGAACCAUCUGAAAGACUU	55	0.290909	0.236364	0.290909	0.181818	-38.5	(((.(((((((((((((((((((((....))))))))))))))))))))))))..	ENSG00000188282	protein_coding	yes	no	no	novel-mir-candidate-376-5p	218041023	218041045	GUCCUUUCAGAUGGUUCUCUAGA	23	0.173913	0.217391	0.391304	0.217391	-0.6	novel-mir-candidate-376-3p	218040991	218041013	CUAGAGAACCAUCUGAAAGACUU	23	0.391304	0.217391	0.217391	0.173913	-1.8
novel-mir-candidate-68	0.9602	chr11	+	69382651	69382740	AGCUGGAUGACCCUGACAAGCUGUAUCUCCCUUGAACUUCGCGUUCCUUCGCUGGGGUAUGAAGACACAGCUUGUCAAGAUCAUCCAGCU	90	0.222222	0.277778	0.266667	0.233333	-43.1	((((((((((...(((((((((((.(((...(((.((((((((......))).))))).)))))).)))))))))))...))))))))))			no	no	yes	novel-mir-candidate-68-5p	69382651	69382672	AGCUGGAUGACCCUGACAAGCU	22	0.272727	0.272727	0.181818	0.272727	-1.7	novel-mir-candidate-68-3p	69382720	69382740	GCUUGUCAAGAUCAUCCAGCU	21	0.238095	0.285714	0.285714	0.190476	-0.2
novel-mir-candidate-402	0.9657	chr19	+	35161499	35161545	CUCAUUGGUUCAGCUGGAGUCACAUGCUCAUGUCUGAACCAAUGAGA	47	0.255319	0.234043	0.276596	0.234043	-24.2	(((((((((((((...((((.....))))....))))))))))))).	ENSG00000089327	protein_coding	yes	no	no	novel-mir-candidate-402-5p	35161499	35161519	CUCAUUGGUUCAGCUGGAGUC	21	0.142857	0.238095	0.333333	0.285714	-0.8	novel-mir-candidate-402-3p	35161526	35161545	UCAUGUCUGAACCAAUGAGA	20	0.35	0.2	0.25	0.2	-0.9
novel-mir-candidate-273	0.9666	chr1	-	167471283	167471349	UCUGGAAAGUAAGUCAGCCCUAAGUUUAAAUAGCCCAGAAAAUUUAGAGCUGAAUUACUUUCCAGAA	67	0.373134	0.179104	0.268657	0.179104	-30.6	((((((((((((.(((((.((((((((............)))))))).))))).)))))))))))).	ENSG00000198821	protein_coding	yes	no	no	novel-mir-candidate-273-5p	167471328	167471349	UCUGGAAAGUAAGUCAGCCCUA	22	0.318182	0.227273	0.227273	0.227273	-1	novel-mir-candidate-273-3p	167471283	167471305	UAGAGCUGAAUUACUUUCCAGAA	23	0.347826	0.173913	0.304348	0.173913	-0.5
novel-mir-candidate-243	0.9688	chr10	-	70322916	70322974	CCAUUCCCCAUCAGAUGAGUCCUAGCAGUUUGGGCCCAUCUGAUGGGGAAUGGCCUGCC	59	0.186441	0.305085	0.237288	0.271186	-38.2	(((((((((((((((((.((((.........)))).)))))))))))))))))......	ENSG00000172731	protein_coding	yes	no	no	novel-mir-candidate-243-5p	70322955	70322974	CCAUUCCCCAUCAGAUGAGU	20	0.25	0.35	0.25	0.15	-0.7	novel-mir-candidate-243-3p	70322916	70322938	CAUCUGAUGGGGAAUGGCCUGCC	23	0.173913	0.26087	0.217391	0.347826	-2.5
novel-mir-candidate-132	0.9703	chr11	+	100970874	100970933	AGAGGCUGAAUUCCCAGUGAGUGCCUUUUGAGUUGCAUUCGCUGGGAAUUCAGCCUCUGC	60	0.183333	0.233333	0.3	0.283333	-44.3	((((((((((((((((((((((((..........))))))))))))))))))))))))..	ENSG00000165895	protein_coding	yes	no	no	novel-mir-candidate-132-5p	100970874	100970897	AGAGGCUGAAUUCCCAGUGAGUGC	24	0.25	0.208333	0.208333	0.333333	-3.1	novel-mir-candidate-132-3p	100970912	100970933	UCGCUGGGAAUUCAGCCUCUGC	22	0.136364	0.318182	0.272727	0.272727	-5.1
novel-mir-candidate-410	0.9733	chr5	+	140668569	140668611	UGGGACAGAGAUGCUCCAAGAAGUUCUACAUCUGUGUCUCUAG	43	0.255814	0.209302	0.27907	0.255814	-14.1	.((((((.(((((...............))))).))))))...	ENSG00000120314	protein_coding	no	no	no	novel-mir-candidate-410-5p	140668569	140668590	UGGGACAGAGAUGCUCCAAGAA	22	0.363636	0.181818	0.136364	0.318182	-3.7	novel-mir-candidate-410-3p	140668591	140668611	GUUCUACAUCUGUGUCUCUAG	21	0.142857	0.238095	0.428571	0.190476	0
novel-mir-candidate-261	0.9741	chr16	+	4683990	4684052	GGGGGCCCUGCUCUGAUGGUCGGUGCAUAGCAGCAGAGGCUGUCCAUUGGAGCCUGGUUCUCU	63	0.126984	0.253968	0.253968	0.365079	-30.7	(((((((..((((((((((.((((((......))....)))).))))))))))..))))))).	ENSG00000102858	protein_coding	yes	no	no	novel-mir-candidate-261-5p	4683990	4684011	GGGGGCCCUGCUCUGAUGGUCG	22	0.0454545	0.272727	0.227273	0.454545	-4	novel-mir-candidate-261-3p	4684031	4684052	GUCCAUUGGAGCCUGGUUCUCU	22	0.0909091	0.272727	0.363636	0.272727	-2.2
novel-mir-candidate-167	0.976	chr11	+	12321512	12321572	GGCAGGAAGAGACGCAGCAGCUUGUCUUUGAUUCUGCCAAGCUUCUGCAUCUUUUCUUCCC	61	0.180328	0.278689	0.311475	0.229508	-25.1	((.(((((((((.((((.((((((.............)))))).)))).))))))))))).	ENSG00000133808	protein_coding	yes	no	no	novel-mir-candidate-167-5p	12321512	12321535	GGCAGGAAGAGACGCAGCAGCUUG	24	0.291667	0.208333	0.0833333	0.416667	-0.7	novel-mir-candidate-167-3p	12321550	12321572	AAGCUUCUGCAUCUUUUCUUCCC	23	0.130435	0.347826	0.434783	0.0869565	-1.4
novel-mir-candidate-18	0.9762	chr12	-	80906571	80906631	UCUGGCUCCUUUCUAAUCACUAUGUCAGGAUGCCACAGUGAUUAGACAGGAGCCAGACACA	61	0.278689	0.262295	0.245902	0.213115	-33.8	((((((((((.((((((((((.((.((...)).)).)))))))))).))))))))))....	ENSG00000111052	protein_coding	yes	no	no	novel-mir-candidate-18-5p	80906609	80906631	UCUGGCUCCUUUCUAAUCACUAU	23	0.173913	0.304348	0.434783	0.0869565	0	novel-mir-candidate-18-3p	80906571	80906592	GAUUAGACAGGAGCCAGACACA	22	0.409091	0.227273	0.0909091	0.272727	0	ptr-miR-149_MIMAT0008043
novel-mir-candidate-21	0.9788	chr14	-	105865525	105865584	UGGCUGAGCUGAGAACCACUGUGCUAACUGGGGACACAGUGAUUGGCAGCUCUACAAAAA	60	0.3	0.216667	0.2	0.283333	-22.3	((...((((((..((.(((((((((......)).))))))).))..))))))..))....	ENSG00000236597	IG_D_gene	no	no	no	novel-mir-candidate-21-5p	105865561	105865584	UGGCUGAGCUGAGAACCACUGUGC	24	0.208333	0.25	0.208333	0.333333	-0.9	novel-mir-candidate-21-3p	105865525	105865549	ACAGUGAUUGGCAGCUCUACAAAAA	25	0.4	0.2	0.2	0.2	-0.1
novel-mir-candidate-422	0.981	chr1	-	27405816	27405881	UAGGAUUAGAUCAUUAGCUCAGUGACCUCCUAGGGUUUCGAUGUGCUAUGUUCUCAUCCUACAGUU	66	0.212121	0.212121	0.363636	0.212121	-20.9	((((((.(((.(((.(((.((..(((((....)))))....)).)))))).))).)))))).....	ENSG00000158195	protein_coding	no	yes	no	novel-mir-candidate-422-5p	27405861	27405881	UAGGAUUAGAUCAUUAGCUCA	21	0.333333	0.142857	0.333333	0.190476	0	novel-mir-candidate-422-3p	27405816	27405838	UGCUAUGUUCUCAUCCUACAGUU	23	0.173913	0.26087	0.434783	0.130435	0
novel-mir-candidate-355	0.981	chr2	+	111135384	111135446	AUUGUGUCCAGUUGUUGGGGGAGAUGUGUAAGCUUGGCUCCCUCAGCCACUGCUGACACCAGG	63	0.174603	0.238095	0.269841	0.31746	-28	...(((((((((.((((((((((..((....))....)))))))))).))))..)))))....	ENSG00000153094	protein_coding	yes	no	no	novel-mir-candidate-355-5p	111135384	111135405	AUUGUGUCCAGUUGUUGGGGGA	22	0.136364	0.0909091	0.363636	0.409091	-2	novel-mir-candidate-355-3p	111135423	111135446	CCCUCAGCCACUGCUGACACCAGG	24	0.208333	0.458333	0.125	0.208333	-5.4
novel-mir-candidate-314	0.9822	chr4	+	1735490	1735561	CUCUAAGUGGUGUCCUGUGGCAGGGCUCUAGGGCUCUCUACCUGGUGCCUAGCCCAGGAUGAAACUCUGACA	72	0.180556	0.277778	0.25	0.291667	-34	.((..(((..(((((((.(((.((((.(((((........))))).)))).))))))))))..)))..))..	ENSG00000013810	protein_coding	yes	no	no	novel-mir-candidate-314-5p	1735490	1735512	CUCUAAGUGGUGUCCUGUGGCAG	23	0.130435	0.217391	0.304348	0.347826	-1.6	novel-mir-candidate-314-3p	1735538	1735561	CUAGCCCAGGAUGAAACUCUGACA	24	0.333333	0.291667	0.166667	0.208333	-1.7
novel-mir-candidate-260	0.9863	chr20	+	8294629	8294684	GCAGAGCACAAGCACUCCUGAUAAGAUGGCCUUAUCAGAAGUGCUUGUUCUCUGCU	56	0.25	0.25	0.267857	0.232143	-35.8	((((((.(((((((((.((((((((.....)))))))).))))))))).)))))).	ENSG00000182621	protein_coding	yes	no	no	novel-mir-candidate-260-5p	8294629	8294651	GCAGAGCACAAGCACUCCUGAUA	23	0.347826	0.304348	0.130435	0.217391	-1.8	novel-mir-candidate-260-3p	8294662	8294684	AUCAGAAGUGCUUGUUCUCUGCU	23	0.173913	0.217391	0.391304	0.217391	-1.5
novel-mir-candidate-160	0.9896	chr16	-	85868797	85868856	ACGUGACCAGAAGAAGACAAGCGAGUGUAUUCCUUGUUUGUCUUCCUCUGAUCACACCUG	60	0.25	0.25	0.283333	0.216667	-28.3	..((((.((((.(((((((((((((.......))))))))))))).)))).)))).....			no	no	yes	novel-mir-candidate-160-5p	85868833	85868856	ACGUGACCAGAAGAAGACAAGCGA	24	0.458333	0.208333	0.0416667	0.291667	0	novel-mir-candidate-160-3p	85868797	85868819	UUGUCUUCCUCUGAUCACACCUG	23	0.130435	0.347826	0.391304	0.130435	-0.4
novel-mir-candidate-122	0.9911	chr18	-	23561894	23561952	AAGUUCCAUAAUUCUCUGGCUGUGUAGCUUCCUGCGGCAGAGGUUUUCUGGAACCAGCU	59	0.186441	0.237288	0.322034	0.254237	-18.9	..((((((.((.((((((.(((((........))))))))))).))..)))))).....	ENSG00000141458	protein_coding	yes	no	no	novel-mir-candidate-122-5p	23561929	23561952	AAGUUCCAUAAUUCUCUGGCUGUG	24	0.208333	0.208333	0.375	0.208333	-0.7	novel-mir-candidate-122-3p	23561894	23561917	GGCAGAGGUUUUCUGGAACCAGCU	24	0.208333	0.208333	0.25	0.333333	-5
novel-mir-candidate-88	0.9914	chr1	+	87051312	87051369	GGAUGAGGCAGAGUAACUCACAAUAGAACAAACAGUUUUGAGUUACUUUGCCUUAUCC	58	0.327586	0.189655	0.275862	0.206897	-32.4	((((((((((((((((((((.....((((.....))))))))))))))))))))))))	ENSG00000153936, ENSG00000267561	protein_coding, protein_coding	yes	no	no	novel-mir-candidate-88-5p	87051312	87051333	GGAUGAGGCAGAGUAACUCACA	22	0.363636	0.181818	0.136364	0.318182	-2.8	novel-mir-candidate-88-3p	87051348	87051369	UUUGAGUUACUUUGCCUUAUCC	22	0.136364	0.227273	0.5	0.136364	0
novel-mir-candidate-63	0.9978	chr11	-	58504615	58504674	CCUGGACUUCUUAUUUUGGCUCUUGAGCUGCCUGAGCAAAAAUAGGAAGUCCAAGGACUG	60	0.25	0.216667	0.283333	0.25	-28.1	(((((((((((((((((.((((...........)))).)))))))))))))).)))....	ENSG00000255299	lincRNA	yes	no	no	novel-mir-candidate-63-5p	58504652	58504674	CCUGGACUUCUUAUUUUGGCUCU	23	0.0869565	0.26087	0.478261	0.173913	0	novel-mir-candidate-63-3p	58504615	58504636	AAAAUAGGAAGUCCAAGGACUG	22	0.454545	0.136364	0.136364	0.272727	-4	ptr-miR-378a_MIMAT0008130
novel-mir-candidate-55	0.9991	chr1	-	148331639	148331699	ACACUCAUCAACUGUGCCUGACAUGUGGCACUUUGUGUUGCAGGCACAGUUGAUGAUGUGC	61	0.213115	0.229508	0.295082	0.262295	-34.8	.(((((((((((((((((((.((....((((...)))))))))))))))))))))).))).	ENSG00000224481	lincRNA	yes	no	no	novel-mir-candidate-55-5p	148331679	148331699	ACACUCAUCAACUGUGCCUGA	21	0.285714	0.333333	0.238095	0.142857	-1.1	novel-mir-candidate-55-3p	148331639	148331662	UUGCAGGCACAGUUGAUGAUGUGC	24	0.208333	0.166667	0.291667	0.333333	-5.5
novel-mir-candidate-17	0.9992	chr8	-	98393666	98393725	CCCAGCCUACUGGAGGAUAAGAGGAUAUAAAGGUCUCUUAUCCUCCAGUAGACUAGGGAG	60	0.3	0.216667	0.216667	0.266667	-36.2	(((((.((((((((((((((((((.........)))))))))))))))))).)).)))..			no	no	yes	novel-mir-candidate-17-5p	98393703	98393725	CCCAGCCUACUGGAGGAUAAGAG	23	0.304348	0.26087	0.130435	0.304348	-4.5	novel-mir-candidate-17-3p	98393666	98393688	UUAUCCUCCAGUAGACUAGGGAG	23	0.26087	0.217391	0.26087	0.26087	-3
novel-mir-candidate-310	1.0009	chr9	-	99052750	99052803	GGUUCCAAGAGCCUGAGAGGCAGGAACAGCGCUUCUCAGGCUCUUGGAAUCUGC	54	0.222222	0.259259	0.203704	0.314815	-39.3	(((((((((((((((((((((.........)))))))))))))))))))))...	ENSG00000204291	protein_coding	yes	no	no	novel-mir-candidate-310-5p	99052782	99052803	GGUUCCAAGAGCCUGAGAGGCA	22	0.272727	0.227273	0.136364	0.363636	-4.6	novel-mir-candidate-310-3p	99052750	99052771	UUCUCAGGCUCUUGGAAUCUGC	22	0.136364	0.272727	0.363636	0.227273	-1.3
novel-mir-candidate-441	1.0035	chr17	+	77967802	77967851	UAUGACUAAUGAGAUUAUUCUGGCCAAGCCAGAAUGUCUGGUUAGCAUUA	50	0.3	0.16	0.32	0.22	-22.2	.(((.(((((.((((.((((((((...)))))))))))).))))))))..	ENSG00000078687	protein_coding	yes	no	no	novel-mir-candidate-441-5p	77967802	77967826	UAUGACUAAUGAGAUUAUUCUGGCC	25	0.28	0.16	0.36	0.2	-0.8	novel-mir-candidate-441-3p	77967829	77967851	GCCAGAAUGUCUGGUUAGCAUUA	23	0.26087	0.173913	0.304348	0.26087	-6.1
novel-mir-candidate-241	1.0045	chr3	-	143783124	143783180	UGUUUAGCAUCCUGUAGCCUGCAUCCUACUCUGUAGGUUGUAGGAUGCUAAACAGAG	57	0.22807	0.210526	0.315789	0.245614	-33.8	(((((((((((((((((((((((........)))))))))))))))))))))))...	ENSG00000181804	protein_coding	yes	no	no	novel-mir-candidate-241-5p	143783161	143783180	UGUUUAGCAUCCUGUAGCCU	20	0.15	0.25	0.4	0.2	-0.4	novel-mir-candidate-241-3p	143783124	143783146	AGGUUGUAGGAUGCUAAACAGAG	23	0.347826	0.0869565	0.217391	0.347826	-1.6
novel-mir-candidate-163	1.0064	chr4	+	141707994	141708052	GACUGGAUGUCGGGCUGCAUGUGAAUGUUUGUGGGUGCAGCAAGGCCAUGCAGCUCUGC	59	0.169492	0.20339	0.254237	0.372881	-21.7	(((.....)))((((((((((....((((.((....))))))....))))))))))...	ENSG00000164136	protein_coding	yes	no	no	novel-mir-candidate-163-5p	141707994	141708012	GACUGGAUGUCGGGCUGCA	19	0.157895	0.210526	0.210526	0.421053	-2.7	novel-mir-candidate-163-3p	141708030	141708052	GCAGCAAGGCCAUGCAGCUCUGC	23	0.217391	0.347826	0.130435	0.304348	-5
novel-mir-candidate-129	1.0101	chr19	+	7453387	7453467	AUGUCCAUACAUAGUGAGUGUGUCCACUUCUGUUGUGUUAAAGUGGAAAAGAAAGACGCUAACUCUGCUAUGUGUGGCAGC	81	0.271605	0.17284	0.296296	0.259259	-27.4	.((.((((((((((((((((((((...((((..................)))).)))))..)))).)))))))))))))..	ENSG00000268861, ENSG00000104880	protein_coding, protein_coding	no	no	no	novel-mir-candidate-129-5p	7453387	7453410	AUGUCCAUACAUAGUGAGUGUGUC	24	0.25	0.166667	0.333333	0.25	-3.2	novel-mir-candidate-129-3p	7453447	7453467	AACUCUGCUAUGUGUGGCAGC	21	0.190476	0.238095	0.285714	0.285714	-5.7
novel-mir-candidate-113	1.0171	chr3	-	47046883	47046943	UGUCCACCUGUUUAAUUUUCAAUGUCAUUCCAAUGUCAUUGAAAGCUAAACAGUUGGAGAA	61	0.311475	0.180328	0.344262	0.163934	-23.9	..((((.(((((((.(((((((((.(((....))).))))))))).))))))).))))...	ENSG00000181555	protein_coding	yes	no	no	novel-mir-candidate-113-5p	47046923	47046943	UGUCCACCUGUUUAAUUUUCA	21	0.190476	0.238095	0.47619	0.0952381	0	novel-mir-candidate-113-3p	47046883	47046905	UUGAAAGCUAAACAGUUGGAGAA	23	0.434783	0.0869565	0.217391	0.26087	-0.5
novel-mir-candidate-121	1.0177	chr12	-	124437441	124437502	CCAGGCUCAGGGAAACUGAGACAGUGGACAAGCAUUGAGCCCCCUUUCCCUGAGCCUGCAUU	62	0.241935	0.306452	0.193548	0.258065	-30	.((((((((((((((......(((((......))))).......))))))))))))))....	ENSG00000196498	protein_coding	yes	no	no	novel-mir-candidate-121-5p	124437481	124437502	CCAGGCUCAGGGAAACUGAGAC	22	0.318182	0.272727	0.0909091	0.318182	-6.8	novel-mir-candidate-121-3p	124437441	124437463	CCCCCUUUCCCUGAGCCUGCAUU	23	0.0869565	0.478261	0.304348	0.130435	0
novel-mir-candidate-208	1.0197	chr14	+	20992041	20992092	ACUGGGUGGGCAGUAUAUUCAGAUAUUGGAUCUGAGCCCUGUUCUCCCUAGG	52	0.192308	0.211538	0.307692	0.288462	-19	.(((((.((((((....(((((((.....)))))))..)))))).))).)).	ENSG00000165792	protein_coding	yes	no	no	novel-mir-candidate-208-5p	20992041	20992063	ACUGGGUGGGCAGUAUAUUCAGA	23	0.26087	0.130435	0.26087	0.347826	-4.7	novel-mir-candidate-208-3p	20992068	20992092	GGAUCUGAGCCCUGUUCUCCCUAGG	25	0.12	0.32	0.28	0.28	-2.9	ppy-miR-1199-5p_MIMAT0031121
novel-mir-candidate-81	1.0258	chr1	-	183569267	183569326	ACAGUGUUCUCAUCAGUCAGAAAUGCGUUAUUUGAUUUUCUGGUCUGGAAGAAUGCUCAA	60	0.266667	0.166667	0.35	0.216667	-18.8	..((((((((..(((((((((((..((.....))..))))))).)))).))))))))...	ENSG00000116698, ENSG00000116701	protein_coding, protein_coding	yes	no	no	novel-mir-candidate-81-5p	183569304	183569326	ACAGUGUUCUCAUCAGUCAGAAA	23	0.347826	0.217391	0.26087	0.173913	-0.3	novel-mir-candidate-81-3p	183569267	183569290	UUUCUGGUCUGGAAGAAUGCUCAA	24	0.25	0.166667	0.333333	0.25	-1.7
novel-mir-candidate-127	1.0263	chr8	+	11495238	11495290	AUCUGGUAAUGCGGGUGGAUGAAGUUCACCCUCAUCCACCCACAUUACCAAGG	53	0.264151	0.283019	0.226415	0.226415	-30.2	...((((((((.((((((((((.........)))))))))).))))))))...	ENSG00000136573	protein_coding	yes	no	no	novel-mir-candidate-127-5p	11495238	11495259	AUCUGGUAAUGCGGGUGGAUGA	22	0.227273	0.0909091	0.272727	0.409091	-3.4	novel-mir-candidate-127-3p	11495268	11495290	CUCAUCCACCCACAUUACCAAGG	23	0.304348	0.434783	0.173913	0.0869565	0
novel-mir-candidate-169	1.0273	chr17	-	28561640	28561699	UAGGAGCCAGGGUGCUUUUUGGCUUUCUUUUCUGAGCCAUGGGCAUUCUGUCUCUUGCUC	60	0.1	0.233333	0.4	0.266667	-28	((((((.((((((((((..((((((........)))))).)))))))))).))))))...	ENSG00000258472, ENSG00000087111	protein_coding, protein_coding	yes	no	no	novel-mir-candidate-169-5p	28561675	28561699	UAGGAGCCAGGGUGCUUUUUGGCUU	25	0.12	0.16	0.36	0.36	-9.1	novel-mir-candidate-169-3p	28561640	28561661	AUGGGCAUUCUGUCUCUUGCUC	22	0.0909091	0.272727	0.409091	0.227273	-3.8
novel-mir-candidate-429	1.0285	chr20	-	2234948	2235029	GGCAACCUGCUUGCAUCCAUGACUCCCCAGCUGGAGGCCUAGCUGUAAACAGCAGGAAGUCAUUUAAGAUGCCUGAGCCAGG	82	0.256098	0.280488	0.195122	0.268293	-28.1	.....((((((((((((.((((((.(((((((((....))))))).........)).))))))....)))))..))).))))			no	no	yes	novel-mir-candidate-429-5p	2235008	2235029	GGCAACCUGCUUGCAUCCAUGA	22	0.227273	0.318182	0.227273	0.227273	-2.3	novel-mir-candidate-429-3p	2234948	2234967	UUUAAGAUGCCUGAGCCAGG	20	0.25	0.2	0.25	0.3	-2.3
novel-mir-candidate-389	1.0297	chr7	+	48367944	48368003	UAGGGAGGCUGGGGACUUUGGAAAUGGAUCUUGUCCCAUAACCAACCUGAGCCUCUCUGU	60	0.216667	0.233333	0.266667	0.283333	-29.2	((((((((((.(((...((((..((((........))))..))))))).)))))))))).	ENSG00000179869	protein_coding	yes	no	no	novel-mir-candidate-389-5p	48367944	48367966	UAGGGAGGCUGGGGACUUUGGAA	23	0.217391	0.0869565	0.217391	0.478261	-1.2	novel-mir-candidate-389-3p	48367978	48368003	CCCAUAACCAACCUGAGCCUCUCUGU	26	0.230769	0.423077	0.230769	0.115385	-0.3
novel-mir-candidate-214	1.0306	chr8	+	125952075	125952133	AUGCCUCUCUUGAUCCUUUGGUCCACCGUGUUUUGGGGAUAGAGGAUUAAAGUGAGGAC	59	0.20339	0.186441	0.322034	0.288136	-25.3	...((((.((((((((((((.(((.(((.....))))))))))))))).))).))))..	ENSG00000253651	processed_pseudogene	no	no	no	novel-mir-candidate-214-5p	125952075	125952096	AUGCCUCUCUUGAUCCUUUGGU	22	0.0909091	0.272727	0.454545	0.181818	-0.7	novel-mir-candidate-214-3p	125952111	125952133	GGAUAGAGGAUUAAAGUGAGGAC	23	0.391304	0.0434783	0.173913	0.391304	0	ppy-miR-877_MIMAT0016117
novel-mir-candidate-223	1.035	chr2	-	88633273	88633349	UCUGUUCCUGAACCUAGCAUGAGCGAUUGUGAAGCCAUUGUGGAGCAAUUGUUCAUGCUAGGUUCAGGAACAGAUAU	77	0.25974	0.181818	0.298701	0.25974	-53.8	((((((((((((((((((((((((((((((...((....))...))))))))))))))))))))))))))))))...			no	no	yes	novel-mir-candidate-223-5p	88633327	88633349	UCUGUUCCUGAACCUAGCAUGAG	23	0.217391	0.26087	0.304348	0.217391	0	novel-mir-candidate-223-3p	88633273	88633295	AUGCUAGGUUCAGGAACAGAUAU	23	0.347826	0.130435	0.26087	0.26087	0
novel-mir-candidate-147	1.0361	chr17	-	58279645	58279703	UUGCCUGGGAUAGGAAGUGAGGCGGCUCAGCUCCCCCAUUGUUCUUUCCCCCGGCAGAU	59	0.152542	0.305085	0.254237	0.288136	-22.9	(((((.((((.((((((((.((.(((...))).)).)))).)))).))))..)))))..	ENSG00000005381	protein_coding	no	no	no	novel-mir-candidate-147-5p	58279681	58279703	UUGCCUGGGAUAGGAAGUGAGGC	23	0.217391	0.130435	0.217391	0.434783	-3.5	novel-mir-candidate-147-3p	58279645	58279668	CCAUUGUUCUUUCCCCCGGCAGAU	24	0.125	0.375	0.333333	0.166667	0
novel-mir-candidate-187	1.0365	chr11	-	75337065	75337128	UGAGGGAUGGAAUCUCCUAGCCUGGAGAUAAUUAAAUAAGGCUUAGAUCUCCCUCUCUCCCUUC	64	0.25	0.25	0.296875	0.203125	-20.3	.((((((.(((((((...(((((...............))))).)))).))).)))))).....	ENSG00000137486	protein_coding	yes	no	no	novel-mir-candidate-187-5p	75337105	75337128	UGAGGGAUGGAAUCUCCUAGCCUG	24	0.208333	0.208333	0.25	0.333333	-5.5	novel-mir-candidate-187-3p	75337065	75337088	GCUUAGAUCUCCCUCUCUCCCUUC	24	0.0833333	0.458333	0.375	0.0833333	0
novel-mir-candidate-392	1.0452	chr16	+	3060238	3060295	UUGCAGAUCCCACACUCACCCUGAAUCCUCACUCAGGGUGGGGUCAGGAAUCUGCAUU	58	0.224138	0.310345	0.241379	0.224138	-30.2	.(((((((((.((.((((((((((........))))))))))))..)).)))))))..	ENSG00000008516	protein_coding	no	yes	no	novel-mir-candidate-392-5p	3060238	3060259	UUGCAGAUCCCACACUCACCCU	22	0.227273	0.454545	0.227273	0.0909091	0	novel-mir-candidate-392-3p	3060273	3060295	GGGUGGGGUCAGGAAUCUGCAUU	23	0.173913	0.130435	0.26087	0.434783	-3.5
novel-mir-candidate-137	1.0483	chr14	-	80538043	80538101	ACUGUCCUACUUGUGCCUAUCACAAGUAAGUACUUGAUAGUCACAAGUAAGAGAGUGAA	59	0.338983	0.186441	0.271186	0.20339	-23	(((.((.((((((((.((((((..(((....))))))))).)))))))).)).)))...	ENSG00000100629	protein_coding	yes	no	no	novel-mir-candidate-137-5p	80538080	80538101	ACUGUCCUACUUGUGCCUAUCA	22	0.181818	0.318182	0.363636	0.136364	0	novel-mir-candidate-137-3p	80538043	80538065	AUAGUCACAAGUAAGAGAGUGAA	23	0.478261	0.0869565	0.173913	0.26087	-2
novel-mir-candidate-443	1.0488	chr17	+	16428794	16428853	ACCUGGAUUCUGCUCCCACACAGCCUGUUCCAGGCCCUGCUCACAGUGGUGUCCCAGGUG	60	0.15	0.366667	0.233333	0.25	-21.1	((((((((.(((((....((..(((((...)))))..)).....))))).)).)))))).	ENSG00000187688	protein_coding	no	no	no	novel-mir-candidate-443-5p	16428794	16428815	ACCUGGAUUCUGCUCCCACACA	22	0.227273	0.409091	0.227273	0.136364	-1.4	novel-mir-candidate-443-3p	16428830	16428853	CUGCUCACAGUGGUGUCCCAGGUG	24	0.125	0.291667	0.25	0.333333	-3.3	ptr-miR-378j_MIMAT0024602
novel-mir-candidate-104	1.0489	chr10	+	70322917	70322979	GCAGGCCAUUCCCCAUCAGAUGGGCCCAAACUGCUAGGACUCAUCUGAUGGGGAAUGGCCUGC	63	0.222222	0.301587	0.190476	0.285714	-50.9	((((((((((((((((((((((((.((.........)).))))))))))))))))))))))))	ENSG00000172731	protein_coding	yes	no	no	novel-mir-candidate-104-5p	70322917	70322939	GCAGGCCAUUCCCCAUCAGAUGG	23	0.217391	0.347826	0.173913	0.26087	-2.7	novel-mir-candidate-104-3p	70322960	70322979	UCUGAUGGGGAAUGGCCUGC	20	0.15	0.2	0.25	0.4	-2.5
novel-mir-candidate-333	1.0517	chr10	+	101038581	101038641	AAAUGGGGUGACAGUGAGGCAGGGGACACAAGCCGUUCCAUUGUCUUUCUGUCUCUCCACA	61	0.229508	0.245902	0.245902	0.278689	-29.5	...(((((.(((((.((((((((((((.......))))).))))))).))))).)))))..	ENSG00000107819	protein_coding	yes	no	no	novel-mir-candidate-333-5p	101038581	101038604	AAAUGGGGUGACAGUGAGGCAGGG	24	0.291667	0.0833333	0.125	0.5	0	novel-mir-candidate-333-3p	101038619	101038641	CAUUGUCUUUCUGUCUCUCCACA	23	0.130435	0.347826	0.434783	0.0869565	0
novel-mir-candidate-101	1.0524	chr3	+	172075507	172075579	AACCGAUUCCUUCUAAAAGCUGAAGGCUCCUUGGCAGUGGAUAUUGACCCUUCAACUUUUAGAAGGAAUCAGU	73	0.287671	0.219178	0.287671	0.205479	-31.5	....(((((((((((((((.((((((.((..((........))..)).)))))).)))))))))))))))...	ENSG00000075420	protein_coding	yes	no	no	novel-mir-candidate-101-5p	172075507	172075528	AACCGAUUCCUUCUAAAAGCUG	22	0.318182	0.272727	0.272727	0.136364	0	novel-mir-candidate-101-3p	172075559	172075579	CAACUUUUAGAAGGAAUCAGU	21	0.380952	0.142857	0.285714	0.190476	0
novel-mir-candidate-371	1.053	chr19	+	35009826	35009888	UUGUGGGGCAGCAUUGGGAGUGUGAACCCCCAUCCAGGUUCUCACCUCUCAAACUUCCUCAGA	63	0.206349	0.301587	0.253968	0.238095	-23.2	...(((((.((..(((((((((.(((((........))))).)).))))))).)).)))))..	ENSG00000089351	protein_coding	no	no	no	novel-mir-candidate-371-5p	35009826	35009848	UUGUGGGGCAGCAUUGGGAGUGU	23	0.130435	0.0869565	0.304348	0.478261	-0.5	novel-mir-candidate-371-3p	35009864	35009888	UUCUCACCUCUCAAACUUCCUCAGA	25	0.24	0.4	0.32	0.04	0
novel-mir-candidate-50	1.0614	chr4	-	75973881	75973940	CAUAAACUGCAUGCCUGCACACCAGGCAUGCAGUGAUGUGCAGGCAUGCAGUUUAUGUUA	60	0.266667	0.233333	0.25	0.25	-38.3	(((((((((((((((((((((.((.........)).)))))))))))))))))))))...	ENSG00000198301	protein_coding	yes	no	no	novel-mir-candidate-50-5p	75973917	75973940	CAUAAACUGCAUGCCUGCACACCA	24	0.333333	0.375	0.166667	0.125	-2.5	novel-mir-candidate-50-3p	75973881	75973904	UGUGCAGGCAUGCAGUUUAUGUUA	24	0.208333	0.125	0.375	0.291667	-3.5
novel-mir-candidate-387	1.0657	chr3	-	12898366	12898431	AACUGCUGGAACCCACUGAGCCCUUCCCGGGGUUUCCCGCCGCACUCAGUGUGUUCCUUCAGGCUA	66	0.151515	0.363636	0.242424	0.242424	-27.7	..(((..(((((.(((((((.......((((....)))).....))))))).)))))..)))....	ENSG00000144711	protein_coding	no	yes	no	novel-mir-candidate-387-5p	12898409	12898431	AACUGCUGGAACCCACUGAGCCC	23	0.26087	0.391304	0.130435	0.217391	-1.3	novel-mir-candidate-387-3p	12898366	12898387	CUCAGUGUGUUCCUUCAGGCUA	22	0.136364	0.272727	0.363636	0.227273	-3.9
novel-mir-candidate-41	1.066	chr10	-	74128708	74128773	CAUGGUCCAUUUUGCUCUGCUUCUGAAAGCUGAGUACUUUGCAAGCAGAGCAAAACGGACCAUGCA	66	0.272727	0.242424	0.257576	0.227273	-34.7	((((((((.(((((((((((((...((((.......))))..))))))))))))).))))))))..	ENSG00000185009	protein_coding	yes	no	no	novel-mir-candidate-41-5p	74128752	74128773	CAUGGUCCAUUUUGCUCUGCUU	22	0.0909091	0.272727	0.454545	0.181818	0	novel-mir-candidate-41-3p	74128708	74128730	AGCAGAGCAAAACGGACCAUGCA	23	0.434783	0.26087	0.0434783	0.26087	-1.3
novel-mir-candidate-78	1.0678	chr5	-	34045737	34045797	UCUGCCAUUGACCCAUUAUUGAUUUCUUGGGAGAGAUCAAUAAUGGGCCAAUGGCAGAGAG	61	0.278689	0.180328	0.278689	0.262295	-39.9	((((((((((.((((((((((((((((....)))))))))))))))).))))))))))...	ENSG00000273294	protein_coding	yes	no	no	novel-mir-candidate-78-5p	34045775	34045797	UCUGCCAUUGACCCAUUAUUGAU	23	0.217391	0.26087	0.391304	0.130435	0	novel-mir-candidate-78-3p	34045737	34045759	AAUAAUGGGCCAAUGGCAGAGAG	23	0.391304	0.130435	0.130435	0.347826	-2.7
novel-mir-candidate-56	1.0678	chr7	+	135996149	135996207	AUCUUUUCCUCACCUCGUAUUGCCAGUAACUGGAGCAAUAUGAGGUAGGGAGAAGAUGU	59	0.271186	0.186441	0.288136	0.254237	-32.1	((((((((((.(((((((((((((((...)))..)))))))))))).))))))))))..			no	no	yes	novel-mir-candidate-56-5p	135996149	135996170	AUCUUUUCCUCACCUCGUAUUG	22	0.136364	0.318182	0.454545	0.0909091	0	novel-mir-candidate-56-3p	135996185	135996207	AAUAUGAGGUAGGGAGAAGAUGU	23	0.391304	0	0.217391	0.391304	0
novel-mir-candidate-255	1.0682	chr6	-	11255666	11255717	AAAGGCCUCGCAUGGCUCCAGCGGCUAUGUGGAUCCAUGCAAGGCCUUUUGG	52	0.192308	0.269231	0.230769	0.307692	-28.2	((((((((.((((((.((((.((....)))))).)))))).))))))))...	ENSG00000247925, ENSG00000111859	antisense, protein_coding	yes	no	no	novel-mir-candidate-255-5p	11255697	11255717	AAAGGCCUCGCAUGGCUCCAG	21	0.238095	0.333333	0.142857	0.285714	-5.7	novel-mir-candidate-255-3p	11255666	11255686	GAUCCAUGCAAGGCCUUUUGG	21	0.190476	0.238095	0.285714	0.285714	0
novel-mir-candidate-433	1.0686	chr22	-	50467724	50467784	UCAGCUUGGGGCCUCUGGGUACAGCAUGAAUGAAGCUGCAUCCUUGGGCCGUGGCCAACUC	61	0.180328	0.278689	0.229508	0.311475	-22.8	...(((...(((((..((((.((((.........)))).))))..)))))..)))......	ENSG00000100241	protein_coding	yes	no	no	novel-mir-candidate-433-5p	50467761	50467784	UCAGCUUGGGGCCUCUGGGUACAG	24	0.125	0.25	0.25	0.375	-3.2	novel-mir-candidate-433-3p	50467724	50467746	CAUCCUUGGGCCGUGGCCAACUC	23	0.130435	0.391304	0.217391	0.26087	-3.5	ppy-miR-362-5p_MIMAT0015850
novel-mir-candidate-438	1.0692	chr9	-	2317231	2317281	AGACACUGAGACUUUCUGGUUUUAAGUACCAGCUCAGCCACAGUGGGUAAG	51	0.27451	0.215686	0.254902	0.254902	-11.5	...(((((...((..(((((.......)))))...))...)))))......			no	no	yes	novel-mir-candidate-438-5p	2317262	2317281	AGACACUGAGACUUUCUGGU	20	0.25	0.2	0.3	0.25	0	novel-mir-candidate-438-3p	2317231	2317249	CUCAGCCACAGUGGGUAAG	19	0.263158	0.263158	0.157895	0.315789	-2.3
novel-mir-candidate-145	1.0699	chr13	-	31804807	31804860	AUUGCAAUGGACAUGAACUCUUUUGAUAGAAUAGUUUAUGUCGAUUGCAAUUUC	54	0.296296	0.12963	0.388889	0.185185	-22.9	((((((((.((((((((((.((((...)))).)))))))))).))))))))...			no	no	yes	novel-mir-candidate-145-5p	31804838	31804860	AUUGCAAUGGACAUGAACUCUUU	23	0.304348	0.173913	0.347826	0.173913	0	novel-mir-candidate-145-3p	31804807	31804828	AGUUUAUGUCGAUUGCAAUUUC	22	0.227273	0.136364	0.454545	0.181818	0
novel-mir-candidate-8	1.0756	chr19	-	41263441	41263501	UGCUCUAUGGUCGGGUACCUGACGUGGAACGGGCGCUCUGCACGCGACCAUAGAGCCUUCC	61	0.163934	0.311475	0.213115	0.311475	-28	.((((((((((((.((....(((((.......))).))...)).)))))))))))).....	ENSG00000105323	protein_coding	yes	no	no	novel-mir-candidate-8-5p	41263479	41263501	UGCUCUAUGGUCGGGUACCUGAC	23	0.130435	0.26087	0.304348	0.304348	-4	novel-mir-candidate-8-3p	41263441	41263463	UGCACGCGACCAUAGAGCCUUCC	23	0.217391	0.391304	0.173913	0.217391	-0.4
novel-mir-candidate-409	1.076	chr1	+	231264806	231264870	CUCAGCAGCAUGGCUGACUAAAGACAUUGACAUCAUGACAUUGUCAUGUUGCUCUGCUGUUGCCC	65	0.230769	0.261538	0.292308	0.215385	-20.5	..((((((((.(((.(((....((((.((.((...)).)).))))..)))))).))))))))...	ENSG00000116906	protein_coding	yes	no	no	novel-mir-candidate-409-5p	231264806	231264828	CUCAGCAGCAUGGCUGACUAAAG	23	0.304348	0.26087	0.173913	0.26087	-6.2	novel-mir-candidate-409-3p	231264845	231264870	AUUGUCAUGUUGCUCUGCUGUUGCCC	26	0.0769231	0.269231	0.423077	0.230769	-0.7
novel-mir-candidate-294	1.077	chr19	+	7468768	7468825	UCCAGAGGCCGCACAGCAGGAACCUCACAUUGGAUGUAUCUGCUGUUGUCCCCUCAGG	58	0.206897	0.310345	0.224138	0.258621	-22.2	.((.((((..((((((((((.((.((......)).)).))))))).)))..)))).))	ENSG00000268861, ENSG00000104880	protein_coding, protein_coding	no	no	no	novel-mir-candidate-294-5p	7468768	7468790	UCCAGAGGCCGCACAGCAGGAAC	23	0.304348	0.347826	0.0434783	0.304348	-1.4	novel-mir-candidate-294-3p	7468803	7468825	GUAUCUGCUGUUGUCCCCUCAGG	23	0.0869565	0.304348	0.347826	0.26087	-0.8
novel-mir-candidate-12	1.0783	chr19	+	18284682	18284740	UGUGUGUGCACCUGUGUCUGUCUGUAUUCGUGUUGUAUAGACAGACGCAGGUACACACA	59	0.20339	0.20339	0.322034	0.271186	-38.3	..((((((.((((((((((((((((((.......)))))))))))))))))).))))))			no	no	yes	novel-mir-candidate-12-5p	18284682	18284706	UGUGUGUGCACCUGUGUCUGUCUGU	25	0.04	0.2	0.44	0.32	-0.6	novel-mir-candidate-12-3p	18284718	18284740	AUAGACAGACGCAGGUACACACA	23	0.434783	0.26087	0.0869565	0.217391	0
novel-mir-candidate-444	1.0838	chr7	+	66641452	66641526	ACAUGCAAGCCAUUGAGAGACUUGUUUGCUCAAAUGCAAGUUUGCUCAAAAACAGGUCCUGAAGGCUUGCUUAGG	75	0.293333	0.2	0.266667	0.24	-28.7	....(((((((.((.((.(((((((((...(((((....))))).....))))))))))).))))))))).....	ENSG00000243335	protein_coding	yes	yes	no	novel-mir-candidate-444-5p	66641452	66641475	ACAUGCAAGCCAUUGAGAGACUUG	24	0.333333	0.208333	0.208333	0.25	0	novel-mir-candidate-444-3p	66641507	66641526	GUCCUGAAGGCUUGCUUAGG	20	0.15	0.2	0.3	0.35	-2.8
novel-mir-candidate-233	1.0862	chr14	-	90700693	90700764	UCCGGAGUUGUAAGUGUUGACAAUAUCCAGAAUGACAUUGUCUUUGUCAACACUUACAACUCUGGAAAAGCA	72	0.319444	0.194444	0.291667	0.194444	-36.8	(((((((((((((((((((((((....................)))))))))))))))))))))))......	ENSG00000165914	protein_coding	yes	no	no	novel-mir-candidate-233-5p	90700742	90700764	UCCGGAGUUGUAAGUGUUGACAA	23	0.26087	0.130435	0.304348	0.304348	0	novel-mir-candidate-233-3p	90700693	90700715	ACACUUACAACUCUGGAAAAGCA	23	0.434783	0.26087	0.173913	0.130435	0
novel-mir-candidate-323	1.0869	chr12	-	121004491	121004558	ACAGCGAGAGGCAGCUCUGGGGCUGUGUCCUGACUCCAGCUAACCCAGGGUACCCUCUCGUUGCAGCA	68	0.191176	0.323529	0.191176	0.294118	-36.1	.((((((((((..((((((((((((.((....))..))))...))))))))..)))))))))).....	ENSG00000157895	protein_coding	yes	no	no	novel-mir-candidate-323-5p	121004537	121004558	ACAGCGAGAGGCAGCUCUGGGG	22	0.227273	0.227273	0.0909091	0.454545	-3.9	novel-mir-candidate-323-3p	121004491	121004513	CAGGGUACCCUCUCGUUGCAGCA	23	0.173913	0.347826	0.217391	0.26087	-1.4
novel-mir-candidate-329	1.0869	chr8	-	55909398	55909449	AUCUGUGGGAUUAUGACUGAACAUGUCCAAGUCAGAAUCCCACUCAGGUGGA	52	0.288462	0.211538	0.25	0.25	-19	((((((((((((.(((((...........))))).))))))))..))))...	ENSG00000254087	protein_coding	yes	no	no	novel-mir-candidate-329-5p	55909425	55909449	AUCUGUGGGAUUAUGACUGAACAUG	25	0.28	0.12	0.32	0.28	0	novel-mir-candidate-329-3p	55909398	55909420	AGUCAGAAUCCCACUCAGGUGGA	23	0.304348	0.26087	0.173913	0.26087	-5.4
novel-mir-candidate-95	1.0874	chr20	+	25281973	25282031	GUUGCUCACCUGGUGCAGGGCACAGCAUUUGUGACAGUUCCCUGUUCUCUGUGUUUGCA	59	0.135593	0.254237	0.338983	0.271186	-16.6	..(((.(((..((.((((((((((.....))))......)))))).))..)))...)))	ENSG00000100994	protein_coding	yes	no	no	novel-mir-candidate-95-5p	25281973	25281994	GUUGCUCACCUGGUGCAGGGCA	22	0.136364	0.272727	0.227273	0.363636	-4.1	novel-mir-candidate-95-3p	25282008	25282031	AGUUCCCUGUUCUCUGUGUUUGCA	24	0.0833333	0.25	0.458333	0.208333	0
novel-mir-candidate-30	1.0916	chr3	-	136149916	136149974	AAUCUAGUCAGUUGCUUGAAAGAGCACAGCCCAAAUAAAACAAGGACUGACUAGGUGUA	59	0.38983	0.186441	0.20339	0.220339	-17.9	.((((((((((((.((((......................))))))))))))))))...	ENSG00000174579	protein_coding	no	no	no	novel-mir-candidate-30-5p	136149955	136149974	AAUCUAGUCAGUUGCUUGAA	20	0.3	0.15	0.35	0.2	-0.4	novel-mir-candidate-30-3p	136149916	136149937	AAACAAGGACUGACUAGGUGUA	22	0.409091	0.136364	0.181818	0.272727	-0.2
novel-mir-candidate-299	1.0919	chr10	+	80460530	80460592	CUUGCACUGGCCUGUCCCUCAGGAGACAGGUGUGAGUGGUCCUGAGCUUGGGCCAGUGUAAGA	63	0.174603	0.238095	0.238095	0.349206	-35.1	((((((((((((((...(((((((..((........)).)))))))..)))))))))))))).	ENSG00000108219	protein_coding	yes	no	no	novel-mir-candidate-299-5p	80460530	80460553	CUUGCACUGGCCUGUCCCUCAGGA	24	0.125	0.375	0.25	0.25	-4.7	novel-mir-candidate-299-3p	80460570	80460592	CCUGAGCUUGGGCCAGUGUAAGA	23	0.217391	0.217391	0.217391	0.347826	-3.5
novel-mir-candidate-320	1.092	chr5	-	177505109	177505197	UGGCUUGUGGAGUUCUGGGAUACUGAGGGGAGGGGACAGGGCAUGGGAGUGCGGUGCUCUCACCUUUGACUUGAACUCAUUCCCCAGGG	89	0.168539	0.202247	0.247191	0.382022	-28.8	(((...(((.(((((.((......((((.(((((.((...((((....)))).)).))))).))))...)).))))))))...)))...	ENSG00000146094	protein_coding	no	no	no	novel-mir-candidate-320-5p	177505169	177505197	UGGCUUGUGGAGUUCUGGGAUACUGAGGG	29	0.137931	0.103448	0.310345	0.448276	-1.7	novel-mir-candidate-320-3p	177505109	177505133	UUUGACUUGAACUCAUUCCCCAGGG	25	0.2	0.28	0.32	0.2	-1.3
novel-mir-candidate-442	1.0967	chr10	+	79162712	79162766	CUGGCACACAGCAAGGACUAGGGACAUGUCAGUCCUUUUCCUCAAGGGUGCUAGG	55	0.236364	0.254545	0.218182	0.290909	-22.6	(((((((......((((..((((((......)))))).)))).....))))))).	ENSG00000108175	protein_coding	yes	no	no	novel-mir-candidate-442-5p	79162712	79162730	CUGGCACACAGCAAGGACU	19	0.315789	0.315789	0.105263	0.263158	-1.4	novel-mir-candidate-442-3p	79162749	79162766	UUCCUCAAGGGUGCUAGG	18	0.166667	0.222222	0.277778	0.333333	-0.4
novel-mir-candidate-217	1.0991	chr1	-	165119170	165119226	CUCAAACUGCUGACAGCAUGCAGUCAGCUGCAGGGCCGUUGGUGGUAACUGAUGCUA	57	0.22807	0.245614	0.22807	0.298246	-19.1	.(((.(((((((((.((.(((((....)))))..)).)))))))))...))).....			no	no	yes	novel-mir-candidate-217-5p	165119205	165119226	CUCAAACUGCUGACAGCAUGCA	22	0.318182	0.318182	0.181818	0.181818	-2	novel-mir-candidate-217-3p	165119170	165119188	UUGGUGGUAACUGAUGCUA	19	0.210526	0.105263	0.368421	0.315789	-1.3
novel-mir-candidate-19	1.1013	chr7	+	37784895	37784962	GGCUACCUCUCUGGGUUCUGUUUCUUCCCUGUAAAAUACUUUAGCAACAGAACCCAGAGAGUCAGCCU	68	0.235294	0.279412	0.294118	0.191176	-36.2	((((..((((((((((((((((.((.....(((...)))...)).))))))))))))))))..)))).	ENSG00000187037, ENSG00000086289	protein_coding, protein_coding	yes	no	no	novel-mir-candidate-19-5p	37784895	37784919	GGCUACCUCUCUGGGUUCUGUUUCU	25	0.04	0.28	0.44	0.24	-2.1	novel-mir-candidate-19-3p	37784941	37784962	ACAGAACCCAGAGAGUCAGCCU	22	0.363636	0.318182	0.0909091	0.227273	0
novel-mir-candidate-115	1.1111	chr8	-	140171768	140171839	CUCCUACCCCAGAGUCCUGCUUUGAAUGCACUAAAAAGUAUAAAUAUUAGCAUGGCACUGGAGUAGAGCAUG	72	0.319444	0.222222	0.25	0.208333	-19.2	...((((.((((.(((.((((....((((........)))).......)))).))).)))).))))......	ENSG00000167632	protein_coding	yes	no	no	novel-mir-candidate-115-5p	140171814	140171839	CUCCUACCCCAGAGUCCUGCUUUGAA	26	0.192308	0.384615	0.269231	0.153846	-4.2	novel-mir-candidate-115-3p	140171768	140171789	CAUGGCACUGGAGUAGAGCAUG	22	0.272727	0.181818	0.181818	0.363636	-1.2	ptr-miR-183_MIMAT0002785
novel-mir-candidate-306	1.1174	chr10	+	103451885	103451942	AGGGUGGGUGGUGAGCAGAGGAUGGGCCAGGCCAUCUUCUGAGACCACUGCCCCCAGG	58	0.189655	0.258621	0.155172	0.396552	-32	..((.((((((((..((((((((((......))))))))))....))))))))))...	ENSG00000138172	protein_coding	yes	no	no	novel-mir-candidate-306-5p	103451885	103451907	AGGGUGGGUGGUGAGCAGAGGAU	23	0.217391	0.0434783	0.173913	0.565217	0	novel-mir-candidate-306-3p	103451921	103451942	UUCUGAGACCACUGCCCCCAGG	22	0.181818	0.409091	0.181818	0.227273	-0.9
novel-mir-candidate-94	1.1186	chrX	-	80692721	80692781	UUCCCUUGUUUUAGUCAAAGCAAAGUUCUUUGUUUUCUUUGACUAAAACAAAGGAAUAACU	61	0.311475	0.163934	0.393443	0.131148	-23.6	((((.(((((((((((((((.(((........))).))))))))))))))).)))).....	ENSG00000165288	protein_coding	yes	no	no	novel-mir-candidate-94-5p	80692759	80692781	UUCCCUUGUUUUAGUCAAAGCAA	23	0.26087	0.217391	0.391304	0.130435	-2.2	novel-mir-candidate-94-3p	80692721	80692742	UGACUAAAACAAAGGAAUAACU	22	0.545455	0.136364	0.181818	0.136364	0	ppy-miR-623_MIMAT0016064
novel-mir-candidate-400	1.123	chr15	-	25705932	25705987	GCUGUCAUCCUCAGGUGGAUUCCUUCCCUCCAGGUGCACGUGAGGAUGGCUCUGAG	56	0.142857	0.285714	0.267857	0.303571	-24.3	...((((((((((.(((....(((.......)))..))).))))))))))......	ENSG00000206190	protein_coding	yes	no	no	novel-mir-candidate-400-5p	25705963	25705987	GCUGUCAUCCUCAGGUGGAUUCCUU	25	0.12	0.28	0.36	0.24	-3.6	novel-mir-candidate-400-3p	25705932	25705954	GUGCACGUGAGGAUGGCUCUGAG	23	0.173913	0.173913	0.217391	0.434783	-2.8
novel-mir-candidate-388	1.1244	chr1	-	8863345	8863399	GGGUUAUGGAACCAGAAAAUGGGAUCAUGCCAUCUGGGUUGUUCCUUGGCUUCCA	55	0.218182	0.2	0.290909	0.290909	-15.3	.(((((.(((((((((...(((.......))))))))....)))).)))))....	ENSG00000074800	protein_coding	yes	no	no	novel-mir-candidate-388-5p	8863377	8863399	GGGUUAUGGAACCAGAAAAUGGG	23	0.347826	0.0869565	0.173913	0.391304	-2.7	novel-mir-candidate-388-3p	8863345	8863368	AUCUGGGUUGUUCCUUGGCUUCCA	24	0.0833333	0.25	0.416667	0.25	-2.7
novel-mir-candidate-142	1.1286	chr11	-	65133073	65133136	GUGAGGGCAGGGUGCUGGGAAAGAAUGUUUGGUAUCCACAUUAUUCCCUGCCUGGCCCCCAGCA	64	0.203125	0.25	0.234375	0.3125	-24	.((.((((.((((...(((((..(((((..((...))))))).))))).)))).)))).))...	ENSG00000162298	protein_coding	no	no	no	novel-mir-candidate-142-5p	65133108	65133136	GUGAGGGCAGGGUGCUGGGAAAGAAUGUU	29	0.241379	0.0689655	0.206897	0.482759	-2.2	novel-mir-candidate-142-3p	65133073	65133096	UUAUUCCCUGCCUGGCCCCCAGCA	24	0.125	0.458333	0.25	0.166667	-3.4
novel-mir-candidate-168	1.136	chr3	+	10619650	10619735	ACUGCAGCUUUCAGACCUGCUUCUGCCUUUACUCCUCCUCUACUAAUAGAAGGAGUUUUUGAAAGCCACUGCUGAGGGCUUCAGUU	86	0.209302	0.267442	0.325581	0.197674	-28	((((.(((((((((....((((........((((((..((((....))))))))))......)))).....))))))))).)))).	ENSG00000157087	protein_coding	yes	no	no	novel-mir-candidate-168-5p	10619650	10619668	ACUGCAGCUUUCAGACCUG	19	0.210526	0.315789	0.263158	0.210526	0	novel-mir-candidate-168-3p	10619717	10619735	ACUGCUGAGGGCUUCAGUU	19	0.157895	0.210526	0.315789	0.315789	-3.9	ppy-miR-1301_MIMAT0016221
novel-mir-candidate-300	1.1373	chr16	+	28846993	28847056	GUUGGGCCCUGUGAGGUCAGGCAGCUUGCGGGGACCCUGUACUGCUAGACCUCACAGGGCCAGA	64	0.171875	0.28125	0.1875	0.359375	-44.7	....((((((((((((((.(((((..((((((...))))))))))).))))))))))))))...	ENSG00000178188	protein_coding	yes	no	no	novel-mir-candidate-300-5p	28846993	28847015	GUUGGGCCCUGUGAGGUCAGGCA	23	0.130435	0.217391	0.217391	0.434783	-6.4	novel-mir-candidate-300-3p	28847035	28847056	UGCUAGACCUCACAGGGCCAGA	22	0.272727	0.318182	0.136364	0.272727	-1.2
novel-mir-candidate-335	1.1385	chr1	-	221813952	221814003	AACAGAUGCACUGUGCUACCUGUGUUUCCAGAAUCUGUUGGUAAAGCCUCUC	52	0.230769	0.25	0.307692	0.211538	-8.9	(((((((((((..........)))).......)))))))(((...)))....			no	no	yes	novel-mir-candidate-335-5p	221813985	221814003	AACAGAUGCACUGUGCUAC	19	0.315789	0.263158	0.210526	0.210526	-2.4	novel-mir-candidate-335-3p	221813952	221813974	AGAAUCUGUUGGUAAAGCCUCUC	23	0.26087	0.217391	0.304348	0.217391	-1.1
novel-mir-candidate-154	1.1421	chr15	-	38086048	38086104	ACCCUGAACCACUGCAUACACUUCUUGUUUCAAGUGAAUGUGGUGGUUUGGGCCAGA	57	0.22807	0.22807	0.298246	0.245614	-26	..(((((((((((((((.(((((........))))).))))))))))))))).....			no	no	yes	novel-mir-candidate-154-5p	38086081	38086104	ACCCUGAACCACUGCAUACACUUC	24	0.291667	0.416667	0.208333	0.0833333	0	novel-mir-candidate-154-3p	38086048	38086070	UGAAUGUGGUGGUUUGGGCCAGA	23	0.173913	0.0869565	0.304348	0.434783	-3.3
novel-mir-candidate-225	1.1451	chr12	-	107747324	107747379	UGGCUCUGACGCCAGUGUCCUAUGUUCAUAGCAUAGGUCACUGGGGUCAGAGCCAG	56	0.196429	0.25	0.25	0.303571	-44.1	((((((((((.((((((.((((((((...)))))))).)))))).)))))))))).	ENSG00000110851, ENSG00000258136	protein_coding, antisense	yes	no	no	novel-mir-candidate-225-5p	107747358	107747379	UGGCUCUGACGCCAGUGUCCUA	22	0.136364	0.318182	0.272727	0.272727	-5.1	novel-mir-candidate-225-3p	107747324	107747346	UAGGUCACUGGGGUCAGAGCCAG	23	0.217391	0.217391	0.173913	0.391304	-4.7
novel-mir-candidate-128	1.1455	chr19	-	58567313	58567379	UGGCAGUGCAUACUGUUGGCUCAGAAUUCUGUGCAGACAGAGCCCACAGCAGCAGCCCUGCCCAGCA	67	0.238806	0.313433	0.179104	0.268657	-22.5	.(((((.((...((((.(((((.......(((....)))))))).)))).....)).))))).....	ENSG00000267858, ENSG00000099326	antisense, protein_coding	yes	no	no	novel-mir-candidate-128-5p	58567355	58567379	UGGCAGUGCAUACUGUUGGCUCAGA	25	0.2	0.2	0.28	0.32	-4.4	novel-mir-candidate-128-3p	58567313	58567335	CACAGCAGCAGCCCUGCCCAGCA	23	0.26087	0.478261	0.0434783	0.217391	-3.6	ggo-miR-34a_MIMAT0002494
novel-mir-candidate-322	1.146	chr16	+	57736458	57736515	CUAGCUCUGUCCUUGGGAAUCGCAGGGAGCAGGAGCGGUUCCCUUGCCAGGAGCUGGG	58	0.155172	0.258621	0.206897	0.37931	-28.2	((((((((......(((((((((...........)))))))))......)))))))).	ENSG00000140854	protein_coding	yes	no	no	novel-mir-candidate-322-5p	57736458	57736480	CUAGCUCUGUCCUUGGGAAUCGC	23	0.130435	0.304348	0.304348	0.26087	-1.3	novel-mir-candidate-322-3p	57736493	57736515	CGGUUCCCUUGCCAGGAGCUGGG	23	0.0869565	0.304348	0.217391	0.391304	-8.6
novel-mir-candidate-360	1.1483	chr6	+	149485269	149485321	AGGGGGAGAACCCCUGUUCCAAGUGGGAACUUGGAACAGAAGUUCUCCUGCCU	53	0.245283	0.245283	0.207547	0.301887	-33.1	(((((((((((..(((((((((((....)))))))))))..)))))))).)))			no	no	yes	novel-mir-candidate-360-5p	149485269	149485292	AGGGGGAGAACCCCUGUUCCAAGU	24	0.25	0.25	0.166667	0.333333	-9	novel-mir-candidate-360-3p	149485298	149485321	CUUGGAACAGAAGUUCUCCUGCCU	24	0.208333	0.291667	0.291667	0.208333	-3.5
novel-mir-candidate-246	1.1496	chr12	+	1918437	1918498	UGGGGAGGGGAAGGAGGGCAGAGCAGCCACAGACCAUGAGCUCUGUCUGCCUUCCUCCCAGA	62	0.225806	0.274194	0.145161	0.354839	-31.6	...((.((((((((.(((((((((...............))))))))).))))))))))...	ENSG00000151062, ENSG00000256706	protein_coding, antisense	yes	no	no	novel-mir-candidate-246-5p	1918437	1918458	UGGGGAGGGGAAGGAGGGCAGA	22	0.272727	0.0454545	0.0454545	0.636364	0	novel-mir-candidate-246-3p	1918475	1918498	AGCUCUGUCUGCCUUCCUCCCAGA	24	0.125	0.416667	0.291667	0.166667	-0.6
novel-mir-candidate-171	1.1505	chr10	-	95902674	95902731	AUUCCUGAACUCCAUCACAGAGUUUUUGAACCAAUCUCUGGAAGGGAAUCCAGGAAGU	58	0.310345	0.224138	0.258621	0.206897	-17.6	.((((((...(((.((.(((((.............)))))))..)))...))))))..	ENSG00000226688, ENSG00000270099	antisense, protein_coding	yes	no	no	novel-mir-candidate-171-5p	95902712	95902731	AUUCCUGAACUCCAUCACAG	20	0.3	0.35	0.25	0.1	0	novel-mir-candidate-171-3p	95902674	95902696	CUCUGGAAGGGAAUCCAGGAAGU	23	0.304348	0.173913	0.173913	0.347826	-6.8
novel-mir-candidate-220	1.151	chr12	+	29562569	29562640	GUUUUUGUGGCAGAAUAGAUAGGAAACUGCUUUGGUGGAGUGGAAAAAUAACUGGAUUUGGAGUCAGAAGCC	72	0.305556	0.0972222	0.277778	0.319444	-12.4	(((((((...((((.(((.((.....(((((((...))))))).....)).)))..))))....))))))).	ENSG00000133687	protein_coding	yes	no	no	novel-mir-candidate-220-5p	29562569	29562591	GUUUUUGUGGCAGAAUAGAUAGG	23	0.26087	0.0434783	0.347826	0.347826	-0.7	novel-mir-candidate-220-3p	29562620	29562640	CUGGAUUUGGAGUCAGAAGCC	21	0.238095	0.190476	0.238095	0.333333	-1.6	ptr-miR-378j_MIMAT0024602
novel-mir-candidate-141	1.1603	chrX	-	153944156	153944214	AGGGGCAGGAGGGGCUGGCAAGGCCCGUUCCAGACUUUGCUAACCCUGCCUUCCCACAG	59	0.186441	0.322034	0.169492	0.322034	-25.7	.((((.(((.((((.((((((((...........)))))))).)))).)))))))....	ENSG00000102032	protein_coding	yes	no	no	novel-mir-candidate-141-5p	153944194	153944214	AGGGGCAGGAGGGGCUGGCAA	21	0.238095	0.142857	0.047619	0.571429	-2.4	novel-mir-candidate-141-3p	153944156	153944178	UUGCUAACCCUGCCUUCCCACAG	23	0.173913	0.434783	0.26087	0.130435	-0.3
novel-mir-candidate-436	1.1677	chr6	-	2600350	2600414	UGCCAAAGCAGGCCUGUGGCCAUAGUUAACUCACAGAGGGUGAGGCACAAACCUGCUCUGCACUG	65	0.261538	0.276923	0.184615	0.276923	-19.9	(((...((((((..((((.((.........((((.....))))))))))..))))))..)))...			no	no	yes	novel-mir-candidate-436-5p	2600394	2600414	UGCCAAAGCAGGCCUGUGGCC	21	0.190476	0.333333	0.142857	0.333333	-6	novel-mir-candidate-436-3p	2600350	2600369	CACAAACCUGCUCUGCACUG	20	0.25	0.4	0.2	0.15	-0.3
novel-mir-candidate-59	1.1684	chr19	-	1253360	1253425	GGGGUGGCGGAGGUUUCUGAGAAGUGACAUAGGCUGGGAUGACUCAGAACCGACCGCCUCCCAGCU	66	0.212121	0.242424	0.181818	0.363636	-30.4	.(((.(((((.((((.(((((..((..((.....))..))..)))))))))..))))).)))....	ENSG00000167470	protein_coding	yes	no	no	novel-mir-candidate-59-5p	1253404	1253425	GGGGUGGCGGAGGUUUCUGAGA	22	0.136364	0.0909091	0.227273	0.545455	-2.1	novel-mir-candidate-59-3p	1253360	1253382	UCAGAACCGACCGCCUCCCAGCU	23	0.217391	0.478261	0.130435	0.173913	-0.4
novel-mir-candidate-35	1.169	chr12	-	562955	563012	ACGGGCUCCAUUCUCCCAUGUGCCAAACUCGUGCUCUCGGGGAAUGCAGAGCCCACUA	58	0.206897	0.344828	0.206897	0.241379	-24.3	..((((((((((((((...((((.......))))....))))))))..))))))....	ENSG00000139044	protein_coding	no	yes	no	novel-mir-candidate-35-5p	562989	563012	ACGGGCUCCAUUCUCCCAUGUGCC	24	0.125	0.416667	0.25	0.208333	-3.1	novel-mir-candidate-35-3p	562955	562978	UCUCGGGGAAUGCAGAGCCCACUA	24	0.25	0.291667	0.166667	0.291667	-3.8
novel-mir-candidate-356	1.1707	chr11	+	123609721	123609789	UUGGAGGGGAAACUUGGAUUGGGGAGAGGGCUCUGCCCUCCCUUCCUCAUUCCAGGGCUCUCCUCUACC	69	0.144928	0.304348	0.26087	0.289855	-43.2	.(((((((((..((((((.((((((((((((...))))))...)))))).))))))..)))))))))..	ENSG00000023171	protein_coding	yes	no	no	novel-mir-candidate-356-5p	123609721	123609743	UUGGAGGGGAAACUUGGAUUGGG	23	0.217391	0.0434783	0.26087	0.478261	-2.6	novel-mir-candidate-356-3p	123609767	123609789	UCAUUCCAGGGCUCUCCUCUACC	23	0.130435	0.434783	0.304348	0.130435	-1.3
novel-mir-candidate-424	1.1747	chr7	-	130924023	130924068	ACUUGGAAAGAGGACUGUGGAAGUCAGGUCUUCCCAGUCCUCACCA	46	0.26087	0.26087	0.217391	0.26087	-23.8	...(((...((((((((.(((((......))))))))))))).)))	ENSG00000233559	lincRNA	yes	no	no	novel-mir-candidate-424-5p	130924050	130924068	ACUUGGAAAGAGGACUGUG	19	0.315789	0.105263	0.210526	0.368421	-0.2	novel-mir-candidate-424-3p	130924023	130924048	AAGUCAGGUCUUCCCAGUCCUCACCA	26	0.230769	0.384615	0.230769	0.153846	-3.9
novel-mir-candidate-192	1.1774	chr8	+	120499013	120499067	UUGAGCAAAGGAUGAACACAAUCUACAGUCAGAUUAUGUCACUCCUUUGCCCAGA	55	0.327273	0.236364	0.254545	0.181818	-19.6	(((.(((((((((((.((.(((((......))))).))))).)))))))).))).	ENSG00000172167	protein_coding	yes	no	no	novel-mir-candidate-192-5p	120499013	120499035	UUGAGCAAAGGAUGAACACAAUC	23	0.434783	0.173913	0.173913	0.217391	0	novel-mir-candidate-192-3p	120499044	120499067	GAUUAUGUCACUCCUUUGCCCAGA	24	0.208333	0.291667	0.333333	0.166667	0
novel-mir-candidate-421	1.1839	chr8	-	38274038	38274114	ACCUGGUAGCAUUUAUUUUCCCUCAAGUACCUAGUAACCUUAUGAAGGUAGGGAGGGUAGAUGCUCUACCACAUUCC	77	0.25974	0.233766	0.298701	0.207792	-27.6	...((((((((((((((((((((.....((((.(((....)))..))))))))))))))))))))..))))......	ENSG00000085788, ENSG00000147548	protein_coding, protein_coding	yes	yes	no	novel-mir-candidate-421-5p	38274089	38274114	ACCUGGUAGCAUUUAUUUUCCCUCAA	26	0.230769	0.269231	0.384615	0.115385	0	novel-mir-candidate-421-3p	38274038	38274061	AGGGUAGAUGCUCUACCACAUUCC	24	0.25	0.291667	0.25	0.208333	-6.8
novel-mir-candidate-184	1.1844	chr16	-	88811244	88811309	UGCCGGGUCAGUUGGUCUCCCUGGAGUGCCCAAGCUGAAUCCACAGGGCCCAGCUGCCUUGCUUCU	66	0.136364	0.333333	0.242424	0.287879	-26.8	.((.(((.(((((((.(((..((((..((....))....))))..))).)))))))))).))....	ENSG00000198931	protein_coding	yes	no	no	novel-mir-candidate-184-5p	88811287	88811309	UGCCGGGUCAGUUGGUCUCCCUG	23	0.0434783	0.304348	0.304348	0.347826	-3.1	novel-mir-candidate-184-3p	88811244	88811268	CACAGGGCCCAGCUGCCUUGCUUCU	25	0.12	0.4	0.24	0.24	-8
novel-mir-candidate-71	1.1852	chr1	+	19910423	19910513	UUUUAGUGGCAACAGCUUUGAACUAGAGAGGUAGAUGUAUUAAAGCAGCAUAGAACCAUAACUUCUAGAUAAUGUAGUUGCCACUAGGAGA	91	0.351648	0.142857	0.274725	0.230769	-25.9	(((((((((((((.((.(((..((((((.(((..((((.........))))...))).....)))))).))).)).)))))))))))))..	ENSG00000169914	protein_coding	no	yes	no	novel-mir-candidate-71-5p	19910423	19910445	UUUUAGUGGCAACAGCUUUGAAC	23	0.26087	0.173913	0.347826	0.217391	-2.1	novel-mir-candidate-71-3p	19910490	19910513	GAUAAUGUAGUUGCCACUAGGAGA	24	0.333333	0.125	0.25	0.291667	-0.5
novel-mir-candidate-44	1.188	chr11	-	64801030	64801090	GAGGGGUAGGGGCCACAGAGCAGGGCACCCGGCCAUCCCAUCUGUGACCCCACCUCUAGGA	61	0.213115	0.344262	0.114754	0.327869	-30.2	.((((((.((((.((((((....(((.....)))......)))))).))))))))))....	ENSG00000168067	protein_coding	yes	no	no	novel-mir-candidate-44-5p	64801066	64801090	GAGGGGUAGGGGCCACAGAGCAGGG	25	0.24	0.16	0.04	0.56	-2.2	novel-mir-candidate-44-3p	64801030	64801052	CAUCUGUGACCCCACCUCUAGGA	23	0.217391	0.391304	0.217391	0.173913	-1
novel-mir-candidate-326	1.1892	chr22	+	24437953	24438016	AUGUGGGCGACAAGGUUUGCUGCUGAGAACAGUUUGAAAACCAGCAAAGCAGGUGGCCCAGGGC	64	0.28125	0.203125	0.171875	0.34375	-21.2	...(((((.((....((((((((((....))).........)))))))....)).)))))....	ENSG00000258555, ENSG00000128271, ENSG00000178803	protein_coding, protein_coding, antisense	yes	no	no	novel-mir-candidate-326-5p	24437953	24437976	AUGUGGGCGACAAGGUUUGCUGCU	24	0.166667	0.166667	0.291667	0.375	-3.9	novel-mir-candidate-326-3p	24437993	24438016	CCAGCAAAGCAGGUGGCCCAGGGC	24	0.25	0.333333	0.0416667	0.375	-2.3
novel-mir-candidate-202	1.1914	chr20	-	33676664	33676724	UGGAGGGACCAGGGUUUCCAGAGAUGCUCACCUUGUCUCUGCAGCCCUGGAGCCCCCUGUC	61	0.147541	0.327869	0.229508	0.295082	-28.9	.((.(((.((((((((..((((((((.......)))))))).))))))))..)))))....	ENSG00000101412	protein_coding	no	yes	no	novel-mir-candidate-202-5p	33676702	33676724	UGGAGGGACCAGGGUUUCCAGAG	23	0.217391	0.173913	0.173913	0.434783	-4.8	novel-mir-candidate-202-3p	33676664	33676687	UCUGCAGCCCUGGAGCCCCCUGUC	24	0.0833333	0.458333	0.208333	0.25	-2.3	ptr-miR-1184_MIMAT0007952
novel-mir-candidate-84	1.1924	chr11	+	64341847	64341909	GUGGUCUGAGGUCUUGGGCCAUCAGUGAUGUCACAACCAGAUGGCCCAAGACCCCAGACCACA	63	0.253968	0.301587	0.174603	0.269841	-45.5	((((((((.((((((((((((((.(((....))).....)))))))))))))).)))))))).	ENSG00000168071, ENSG00000278359	protein_coding, miRNA	yes	no	no	novel-mir-candidate-84-5p	64341847	64341869	GUGGUCUGAGGUCUUGGGCCAUC	23	0.0869565	0.217391	0.304348	0.391304	-8.4	novel-mir-candidate-84-3p	64341887	64341909	AUGGCCCAAGACCCCAGACCACA	23	0.347826	0.434783	0.0434783	0.173913	0
novel-mir-candidate-279	1.1988	chr3	-	48680228	48680284	UGGAGAUGGUGAGGGCAGGGAGUGUGCUGAGUCAUGCCUUGCCCUCUCCCUCUAGGA	57	0.157895	0.22807	0.245614	0.368421	-29.7	(((((..((.((((((((((.(((........))).)))))))))).)))))))...	ENSG00000213672	protein_coding	no	no	no	novel-mir-candidate-279-5p	48680260	48680284	UGGAGAUGGUGAGGGCAGGGAGUGU	25	0.2	0.04	0.2	0.56	0	novel-mir-candidate-279-3p	48680228	48680250	UGCCUUGCCCUCUCCCUCUAGGA	23	0.0869565	0.434783	0.304348	0.173913	-1.4
novel-mir-candidate-362	1.2004	chr14	-	100124240	100124321	UGACUCCUAGUCCAGGGCUGGACAUAAGUGUAGCCACAGAGAGCUGCAGCUUGACUCCCUAUCUGACAAAGCUGAGUGAGGA	82	0.268293	0.243902	0.207317	0.280488	-20.2	...((((((((.((((...(((..((((((((((........)))))).))))..)))...)))).....))).)).)))..	ENSG00000196405	protein_coding	yes	no	no	novel-mir-candidate-362-5p	100124300	100124321	UGACUCCUAGUCCAGGGCUGGA	22	0.181818	0.272727	0.227273	0.318182	-5.3	novel-mir-candidate-362-3p	100124240	100124259	CUGACAAAGCUGAGUGAGGA	20	0.35	0.15	0.15	0.35	-2.3
novel-mir-candidate-324	1.201	chr5	+	177434968	177435026	GGUGGGGUGAGAUGCAGAGGCCUGGCCUGUUAACGGGUCCACCUGUUUCUCCACCCACA	59	0.169492	0.288136	0.220339	0.322034	-28.9	.(((((..((((.((((.((((((.........))))))...)))).))))..))))).	ENSG00000198055	protein_coding	yes	no	no	novel-mir-candidate-324-5p	177434968	177434990	GGUGGGGUGAGAUGCAGAGGCCU	23	0.173913	0.130435	0.173913	0.521739	-2.6	novel-mir-candidate-324-3p	177435000	177435026	ACGGGUCCACCUGUUUCUCCACCCACA	27	0.185185	0.444444	0.222222	0.148148	-4.1
novel-mir-candidate-222	1.2062	chr6	-	10661997	10662065	AUCCCACCGCUGCCAAAAGGGGUAAGGAUUCACCCCUUGCUACCUUUUCAGAAUGUGGACCAUGAUGGA	69	0.26087	0.275362	0.231884	0.231884	-21.2	...((((..(((..(((((((((((((.......))))))).)))))))))...)))).(((...))).			no	no	yes	novel-mir-candidate-222-5p	10662043	10662065	AUCCCACCGCUGCCAAAAGGGGU	23	0.26087	0.347826	0.130435	0.26087	-5.7	novel-mir-candidate-222-3p	10661997	10662015	GAAUGUGGACCAUGAUGGA	19	0.315789	0.105263	0.210526	0.368421	-0.6	ppy-miR-1260a_MIMAT0016184
novel-mir-candidate-62	1.2077	chr1	-	149928391	149928448	CAGAUGGGGCCAGAGUGUUCUAGAGAUCCAGACUCUAGAGCUCCGAUCCCAUCCACCC	58	0.241379	0.327586	0.189655	0.241379	-22.7	..(((((((...((((..(((((((.......)))))))))))...))))))).....			no	no	yes	novel-mir-candidate-62-5p	149928424	149928448	CAGAUGGGGCCAGAGUGUUCUAGAG	25	0.24	0.16	0.2	0.4	-3.3	novel-mir-candidate-62-3p	149928391	149928413	UAGAGCUCCGAUCCCAUCCACCC	23	0.217391	0.478261	0.173913	0.130435	0
novel-mir-candidate-105	1.2079	chr12	+	111445154	111445211	GACUAGGCCUGGAGCGGAACUGAAAGGGAGACUAGGCCCGUUCCCCUCCAGGCCUGGC	58	0.206897	0.310345	0.137931	0.344828	-35	..((((((((((((.(((((.....(((........)))))))).)))))))))))).	ENSG00000111252	protein_coding	yes	no	no	novel-mir-candidate-105-5p	111445154	111445176	GACUAGGCCUGGAGCGGAACUGA	23	0.26087	0.217391	0.130435	0.391304	-2.5	novel-mir-candidate-105-3p	111445191	111445211	CCGUUCCCCUCCAGGCCUGGC	21	0.047619	0.52381	0.190476	0.238095	-1.8
novel-mir-candidate-272	1.2084	chr2	+	109253968	109254028	UGGGGCCUGGCCCCUGAGAUGUGUAGGUUAUACAUCAUACAACUCAGGGGCCAGGCACCAU	61	0.229508	0.262295	0.213115	0.295082	-42.3	(((.((((((((((((((.(((((.(((.....)))))))).)))))))))))))).))).	ENSG00000172985	protein_coding	yes	no	no	novel-mir-candidate-272-5p	109253968	109253990	UGGGGCCUGGCCCCUGAGAUGUG	23	0.0869565	0.26087	0.217391	0.434783	-9.1	novel-mir-candidate-272-3p	109254006	109254028	ACAACUCAGGGGCCAGGCACCAU	23	0.304348	0.347826	0.0869565	0.26087	-2.3
novel-mir-candidate-378	1.2103	chr1	-	235941577	235941638	AGACCCCAGCAAGGCAAACCUGAGCCAUUCUUGGGACAGGGUUGGUCUUGAUGGGGCCACAU	62	0.241935	0.258065	0.193548	0.306452	-28.8	...(((((.((((((...((((..(((....)))..))))....)))))).)))))......			no	no	yes	novel-mir-candidate-378-5p	235941617	235941638	AGACCCCAGCAAGGCAAACCUG	22	0.363636	0.363636	0.0454545	0.227273	-1.5	novel-mir-candidate-378-3p	235941577	235941600	GGGUUGGUCUUGAUGGGGCCACAU	24	0.125	0.166667	0.291667	0.416667	-6.3
novel-mir-candidate-302	1.2135	chr22	+	19957646	19957709	GCCCUCACACGUGCAUCUGCAUGUGGCGUGCAUGUGGCAAGCAUGUGCAGGUGCUGUGUGGGCA	64	0.15625	0.25	0.234375	0.359375	-36.9	((((..(((((.((((((((((((.((.(((.....))).))))))))))))))))))))))).	ENSG00000093010	protein_coding	yes	no	no	novel-mir-candidate-302-5p	19957646	19957667	GCCCUCACACGUGCAUCUGCAU	22	0.181818	0.409091	0.227273	0.181818	-2.6	novel-mir-candidate-302-3p	19957685	19957709	AGCAUGUGCAGGUGCUGUGUGGGCA	25	0.16	0.16	0.24	0.44	-4.9
novel-mir-candidate-298	1.2172	chr4	-	75973917	75973976	ACACCAGGCAUGCAGUUAGAAGUAAGCAUCACUCAGCAUAAACUGCAUGCCUGCACACCA	60	0.35	0.3	0.166667	0.183333	-22.1	....(((((((((((((.....((.((........)).))))))))))))))).......	ENSG00000198301	protein_coding	yes	no	no	novel-mir-candidate-298-5p	75973948	75973976	ACACCAGGCAUGCAGUUAGAAGUAAGCAU	29	0.37931	0.206897	0.172414	0.241379	-3.1	novel-mir-candidate-298-3p	75973917	75973940	CAUAAACUGCAUGCCUGCACACCA	24	0.333333	0.375	0.166667	0.125	-2.5
novel-mir-candidate-395	1.2187	chr5	-	172057431	172057497	AGCUCGGUGGCAUGUCCUCUGCAGACCGGGAAGCAGCCCUGUGGGAGAUGGAAGAGCACCAGCUGCA	67	0.223881	0.268657	0.149254	0.358209	-22.4	((((.((((.....((((((....((.(((......))).))...))).)))....))))))))...	ENSG00000072786	protein_coding	no	no	no	novel-mir-candidate-395-5p	172057473	172057497	AGCUCGGUGGCAUGUCCUCUGCAGA	25	0.16	0.28	0.24	0.32	-3.7	novel-mir-candidate-395-3p	172057431	172057456	UGGGAGAUGGAAGAGCACCAGCUGCA	26	0.307692	0.192308	0.115385	0.384615	-2.1	ptr-miR-423_MIMAT0008142
novel-mir-candidate-189	1.2232	chr2	+	27441219	27441266	AGAGGGUAGGGAAGAAAAGUCUCAUUUUCUGACUGUCCUAUUCUCCAG	48	0.270833	0.1875	0.291667	0.25	-14.3	.((((((((((.((((((......)))))).....))))))))))...	ENSG00000115216	protein_coding	no	no	no	novel-mir-candidate-189-5p	27441219	27441243	AGAGGGUAGGGAAGAAAAGUCUCAU	25	0.4	0.08	0.16	0.36	-1.8	novel-mir-candidate-189-3p	27441246	27441266	UCUGACUGUCCUAUUCUCCAG	21	0.142857	0.333333	0.380952	0.142857	0
novel-mir-candidate-159	1.2237	chr15	-	44427217	44427275	CGUUAGGAGUGGAGAGGCGGGGACCCGAAGGACGGUUUUUCCUCCCGCUCCUAACGGAA	59	0.20339	0.254237	0.186441	0.355932	-34.1	((((((((((((.((((.(((((((........)))))))))))))))))))))))...	ENSG00000137770	protein_coding	no	no	no	novel-mir-candidate-159-5p	44427257	44427275	CGUUAGGAGUGGAGAGGCG	19	0.210526	0.105263	0.157895	0.526316	0	novel-mir-candidate-159-3p	44427217	44427240	UUUUUCCUCCCGCUCCUAACGGAA	24	0.166667	0.375	0.333333	0.125	-2.3
novel-mir-candidate-215	1.2252	chr3	-	190574520	190574599	UGUAAACAUCCUUGACUGAGUCCCUUAACACCUAAGUGGAGGGACAGAGCCUGCAGUCAGUCAUUGGAAAAGGAGCAAAA	80	0.3375	0.2125	0.2	0.25	-22.6	........(((.((((((((((((((.((......)).)))))))...........)))))))..)))............	ENSG00000196083	protein_coding	yes	no	no	novel-mir-candidate-215-5p	190574578	190574599	UGUAAACAUCCUUGACUGAGUC	22	0.272727	0.227273	0.318182	0.181818	0	novel-mir-candidate-215-3p	190574520	190574539	UCAUUGGAAAAGGAGCAAAA	20	0.5	0.1	0.15	0.25	0	ptr-miR-30b_MIMAT0002214
novel-mir-candidate-193	1.226	chr11	+	65589885	65589935	CUGGGGGUGGGUGGUGGUUAGGGGGUGCCUUAUCAUCAUCUCUGUCUGCAG	51	0.0980392	0.176471	0.313726	0.411765	-20.7	(((.(((.((((((((((.(((.....))).))))))))))...))).)))	ENSG00000173442	protein_coding	yes	no	no	novel-mir-candidate-193-5p	65589885	65589906	CUGGGGGUGGGUGGUGGUUAGG	22	0.0454545	0.0454545	0.272727	0.636364	0	novel-mir-candidate-193-3p	65589916	65589935	AUCAUCAUCUCUGUCUGCAG	20	0.2	0.3	0.35	0.15	0
novel-mir-candidate-150	1.2266	chr4	-	77800564	77800602	AAAAGUAUGGGAUGGCUGUUACAGCUAUUCAGACUUUCA	39	0.307692	0.153846	0.307692	0.230769	-11.7	.(((((...(((((((((...)))))))))..)))))..	ENSG00000138767	protein_coding	yes	no	no	novel-mir-candidate-150-5p	77800584	77800602	AAAAGUAUGGGAUGGCUGU	19	0.315789	0.0526316	0.263158	0.368421	-0.3	novel-mir-candidate-150-3p	77800564	77800584	UUACAGCUAUUCAGACUUUCA	21	0.285714	0.238095	0.380952	0.0952381	0	ptr-miR-548l_MIMAT0008226
novel-mir-candidate-345	1.2277	chr7	-	139722662	139722713	AACAGGGUAAGCAUACGUCCAACCGGCAGUAGGACGUAUGCUUACCCUGUCC	52	0.269231	0.288462	0.192308	0.25	-36.4	.(((((((((((((((((((.((.....)).)))))))))))))))))))..	ENSG00000064393	protein_coding	yes	no	no	novel-mir-candidate-345-5p	139722691	139722713	AACAGGGUAAGCAUACGUCCAAC	23	0.391304	0.26087	0.130435	0.217391	-0.2	novel-mir-candidate-345-3p	139722662	139722684	UAGGACGUAUGCUUACCCUGUCC	23	0.173913	0.304348	0.304348	0.217391	-4
novel-mir-candidate-341	1.2283	chr19	-	55225489	55225541	UGAGGAGGAUCUGAAGGAUUGGACUCAGGUUCGAAACCUCCACUUCCUCCUCA	53	0.245283	0.264151	0.245283	0.245283	-25.4	(((((((((..((.(((.((((((....))))))..))).))..)))))))))			no	no	yes	novel-mir-candidate-341-5p	55225523	55225541	UGAGGAGGAUCUGAAGGAU	19	0.315789	0.0526316	0.210526	0.421053	0	novel-mir-candidate-341-3p	55225489	55225508	AAACCUCCACUUCCUCCUCA	20	0.25	0.5	0.25	0	0
novel-mir-candidate-383	1.2306	chr5	-	157497088	157497141	GUUGAGGGUGGGGAGGAGAUUGACUGUGUUUUCCUCUCAUUCCUUGGCUCAGCU	54	0.12963	0.185185	0.351852	0.333333	-21.2	((((((((..(((((((((..........)))))))))..))))))))......	ENSG00000135074	protein_coding	no	no	no	novel-mir-candidate-383-5p	157497122	157497141	GUUGAGGGUGGGGAGGAGAU	20	0.2	0	0.2	0.6	0	novel-mir-candidate-383-3p	157497088	157497110	UCCUCUCAUUCCUUGGCUCAGCU	23	0.0869565	0.391304	0.391304	0.130435	0
novel-mir-candidate-97	1.2325	chr6	-	80453454	80453526	CCCAGACACAUAGGACCACACUGUGGUAUGUGUAUGAACUGUUUUUCACAUUGUGGUCCUAUAUGUCUGGUCA	73	0.232877	0.219178	0.328767	0.219178	-36	.(((((((.(((((((((((.(((((...((......))......))))).))))))))))).)))))))...	ENSG00000233967	lincRNA	yes	no	no	novel-mir-candidate-97-5p	80453504	80453526	CCCAGACACAUAGGACCACACUG	23	0.347826	0.391304	0.0869565	0.173913	0	novel-mir-candidate-97-3p	80453454	80453476	UUGUGGUCCUAUAUGUCUGGUCA	23	0.130435	0.173913	0.434783	0.26087	-1
novel-mir-candidate-229	1.2327	chr8	+	2186945	2187024	CAGAGGACAUGGAGGCAUCCUGAGGUGGAUGACAAGGCGUGGAGGGAUGCGAUGCCCCAGAAUGCCUCCAUGUCCUCUGC	80	0.225	0.25	0.175	0.35	-46.2	((((((((((((((((((.(((.((((.........((((......))))..)))).))).)))))))))))))))))).			no	no	yes	novel-mir-candidate-229-5p	2186945	2186965	CAGAGGACAUGGAGGCAUCCU	21	0.285714	0.238095	0.142857	0.333333	-2.6	novel-mir-candidate-229-3p	2187002	2187024	CAGAAUGCCUCCAUGUCCUCUGC	23	0.173913	0.391304	0.26087	0.173913	-2.3
novel-mir-candidate-205	1.2337	chr17	-	58279681	58279757	UCAACUUCUUCCUCCAGGGAGUCUCAGGAGUCUCCAGGGCUCCUCAGCCUCAGGUUGCCUGGGAUAGGAAGUGAGGC	77	0.181818	0.285714	0.233766	0.298701	-30.7	(((.((((((..(((((((((.((.((((((((...)))))))).)).)))......))))))..)))))))))...	ENSG00000005381	protein_coding	yes	no	no	novel-mir-candidate-205-5p	58279735	58279757	UCAACUUCUUCCUCCAGGGAGUC	23	0.173913	0.347826	0.304348	0.173913	-4.4	novel-mir-candidate-205-3p	58279681	58279702	UGCCUGGGAUAGGAAGUGAGGC	22	0.227273	0.136364	0.181818	0.454545	-3.5	ptr-miR-661_MIMAT0012814
novel-mir-candidate-96	1.2353	chr17	-	443798	443855	AUCCAGGGCUGCUGCCCGCAGUGGCUAACAGUGAUGUGGGGCCAGCUUUGGAAGCCUG	58	0.172414	0.258621	0.206897	0.362069	-26.2	.((((((((((..((((...((.(((...))).))...))))))))))))))......	ENSG00000183688	protein_coding	yes	no	no	novel-mir-candidate-96-5p	443835	443855	AUCCAGGGCUGCUGCCCGCAG	21	0.142857	0.380952	0.142857	0.333333	-7.9	novel-mir-candidate-96-3p	443798	443819	UGGGGCCAGCUUUGGAAGCCUG	22	0.136364	0.227273	0.227273	0.409091	-3.7
novel-mir-candidate-107	1.2377	chr17	-	74522904	74522966	UCAGGGGAUGGGAGUGACAUGGCCUGGGGAUGCCCAGGGCUCUGACCACUGCAUCCCCUUCCC	63	0.15873	0.31746	0.190476	0.333333	-32.5	..((((((((..((((.((.((((((((....)))).)))).))..)))).))))))))....	ENSG00000178789	protein_coding	yes	no	no	novel-mir-candidate-107-5p	74522943	74522966	UCAGGGGAUGGGAGUGACAUGGCC	24	0.208333	0.166667	0.166667	0.458333	-1.7	novel-mir-candidate-107-3p	74522904	74522926	UCUGACCACUGCAUCCCCUUCCC	23	0.130435	0.521739	0.26087	0.0869565	0
novel-mir-candidate-307	1.2397	chr20	+	49889766	49889819	GUGCGGGCAGGGAUCUGAGACCAGAUUGUUCUCGCACCCCUGCCAGAACUCACU	54	0.203704	0.314815	0.203704	0.277778	-20.6	((...(((((((...(((((.((...)).)))))...)))))))...)).....	ENSG00000197818	protein_coding	no	yes	no	novel-mir-candidate-307-5p	49889766	49889789	GUGCGGGCAGGGAUCUGAGACCAG	24	0.208333	0.208333	0.125	0.458333	-2.6	novel-mir-candidate-307-3p	49889798	49889819	CGCACCCCUGCCAGAACUCACU	22	0.227273	0.5	0.136364	0.136364	-1.2
novel-mir-candidate-318	1.2406	chr19	-	33248687	33248749	AGUGCGUCAGCACUCUGCCCUGACCCAGCAUACCCAGAGGUCAAGGUCGAGUCUGAUGCAGUC	63	0.222222	0.31746	0.190476	0.269841	-28.1	..((((((((.((((.(((.(((((.............))))).))).))))))))))))...			no	no	yes	novel-mir-candidate-318-5p	33248726	33248749	AGUGCGUCAGCACUCUGCCCUGAC	24	0.166667	0.375	0.208333	0.25	-6.1	novel-mir-candidate-318-3p	33248687	33248709	UCAAGGUCGAGUCUGAUGCAGUC	23	0.217391	0.217391	0.26087	0.304348	-0.4
novel-mir-candidate-27	1.2439	chr16	-	3548217	3548267	GCCACAUAGUCACAUAGUCACAUAGUCACAUGUGUCUGUGUCUGCCCAGCC	51	0.235294	0.313726	0.254902	0.196078	-13.5	((.((((((.(((((.((.((...)).))))))).))))))..))......	ENSG00000167984	protein_coding	no	no	no	novel-mir-candidate-27-5p	3548249	3548267	GCCACAUAGUCACAUAGUC	19	0.315789	0.315789	0.210526	0.157895	0	novel-mir-candidate-27-3p	3548217	3548240	ACAUGUGUCUGUGUCUGCCCAGCC	24	0.125	0.333333	0.291667	0.25	-0.2
novel-mir-candidate-182	1.2443	chr12	+	6729467	6729530	GCACUGUCCCCUUCUCACCCUGAGAAAGAGAAAGGCGCUUCAGGGUGAGAGAGGGCAGGAGCUG	64	0.25	0.25	0.15625	0.34375	-32.2	((.(((.(((.(((((((((((((..............))))))))))))).))))))..))..	ENSG00000111652	protein_coding	yes	no	no	novel-mir-candidate-182-5p	6729467	6729489	GCACUGUCCCCUUCUCACCCUGA	23	0.130435	0.478261	0.26087	0.130435	0	novel-mir-candidate-182-3p	6729506	6729530	UCAGGGUGAGAGAGGGCAGGAGCUG	25	0.24	0.12	0.12	0.52	-1.7
novel-mir-candidate-374	1.2444	chr9	+	130406742	130406787	AGGGACCUUGGGCAGGUAUAAUAGUUCAGCCUGUCUGAGCGCCGCU	46	0.195652	0.23913	0.23913	0.326087	-17.5	..((..(((((((((((...........)))))))))))..))...	ENSG00000148357	protein_coding	yes	no	no	novel-mir-candidate-374-5p	130406742	130406761	AGGGACCUUGGGCAGGUAUA	20	0.25	0.15	0.2	0.4	-2.6	novel-mir-candidate-374-3p	130406768	130406787	CAGCCUGUCUGAGCGCCGCU	20	0.1	0.4	0.2	0.3	-1.8
novel-mir-candidate-286	1.2454	chr6	-	166955817	166955886	UUGGGGGGAGCCCUUAGCACACUCAGAAGUGACCUCUGGGAAGGAGUGCGAUGAGGGGAGUCCUGAGCAC	70	0.228571	0.214286	0.171429	0.385714	-23.2	((.((((...((((((((((.((((((.......)))))).....))))..))))))...)))).))...	ENSG00000249141, ENSG00000026297	protein_coding, protein_coding	yes	no	no	novel-mir-candidate-286-5p	166955864	166955886	UUGGGGGGAGCCCUUAGCACACU	23	0.173913	0.26087	0.217391	0.347826	-5.4	novel-mir-candidate-286-3p	166955817	166955841	GUGCGAUGAGGGGAGUCCUGAGCAC	25	0.2	0.2	0.16	0.44	-7
novel-mir-candidate-401	1.2519	chr1	+	26546628	26546690	UGGGCCUAACCAGGCCAGAGCAUCGUGAGCAAUAGGAGCGGUGCCUGUUCUGGUUUGACCUCC	63	0.190476	0.269841	0.222222	0.31746	-25.5	.(((...(((((((.(((.(((((((...........)))))))))).)))))))...)))..	ENSG00000117676	protein_coding	yes	no	no	novel-mir-candidate-401-5p	26546628	26546650	UGGGCCUAACCAGGCCAGAGCAU	23	0.26087	0.304348	0.130435	0.304348	-8.2	novel-mir-candidate-401-3p	26546667	26546690	GGUGCCUGUUCUGGUUUGACCUCC	24	0.0416667	0.291667	0.375	0.291667	-5
novel-mir-candidate-178	1.2525	chr1	+	41663749	41663811	UUGCAGCUGGACAUGGGUCUGCACACUCACGUACACGAUUGCAAACCCACUGACCAGCUGCCA	63	0.253968	0.333333	0.190476	0.222222	-29.2	..((((((((.(((((((.((((...((........)).)))).))))).)).))))))))..	ENSG00000127124	protein_coding	yes	no	no	novel-mir-candidate-178-5p	41663749	41663771	UUGCAGCUGGACAUGGGUCUGCA	23	0.173913	0.217391	0.26087	0.347826	-6.2	novel-mir-candidate-178-3p	41663787	41663811	UUGCAAACCCACUGACCAGCUGCCA	25	0.28	0.4	0.16	0.16	0
novel-mir-candidate-336	1.2534	chr19	+	51904442	51904486	GCCUGGGCUUGUAAAAUACCAGAUUUUACAAGCCUCUGAGCCCCA	45	0.266667	0.288889	0.244444	0.2	-16.3	((..(((((((((((((.....)))))))))))))....))....	ENSG00000198093	protein_coding	yes	no	no	novel-mir-candidate-336-5p	51904442	51904463	GCCUGGGCUUGUAAAAUACCAG	22	0.272727	0.227273	0.227273	0.272727	-4.1	novel-mir-candidate-336-3p	51904468	51904486	UACAAGCCUCUGAGCCCCA	19	0.263158	0.421053	0.157895	0.157895	0
novel-mir-candidate-166	1.2554	chrX	+	153348250	153348308	GAUGUGGGGUAGGGAGGGGCUUAGAGGUCAUCAACUCCAAGCUCCCCCCGCCCCAGAGA	59	0.220339	0.288136	0.152542	0.338983	-33.3	....((((((.(((.(((((((.(((........))).)))))))))).))))))....	ENSG00000063587	protein_coding	no	yes	no	novel-mir-candidate-166-5p	153348250	153348271	GAUGUGGGGUAGGGAGGGGCUU	22	0.136364	0.0454545	0.227273	0.590909	-0.1	novel-mir-candidate-166-3p	153348288	153348308	AAGCUCCCCCCGCCCCAGAGA	21	0.238095	0.52381	0.047619	0.190476	-0.2
novel-mir-candidate-211	1.2602	chr5	+	52524356	52524406	CAGUGCCUGGCAAGUCCUGUUCUGAGCUUCAUUGCAGCUGCCUGGGAGUGG	51	0.137255	0.254902	0.27451	0.333333	-12.6	((...((.((((....((((..(((...)))..)))).)))).))...)).			no	no	yes	novel-mir-candidate-211-5p	52524356	52524376	CAGUGCCUGGCAAGUCCUGUU	21	0.142857	0.285714	0.285714	0.285714	-1.1	novel-mir-candidate-211-3p	52524383	52524406	UUCAUUGCAGCUGCCUGGGAGUGG	24	0.125	0.208333	0.291667	0.375	-3	ppy-miR-1301_MIMAT0016221
novel-mir-candidate-172	1.2609	chr4	+	112357244	112357308	CAUCCAGCAUCUGGCAGGACGUGCUGGGGUGUUCGCCAACACAGCCGGACUGCAGAAGCUGGCGG	65	0.2	0.292308	0.153846	0.353846	-29.8	...(((((.((((.(((..((.((((..((........)).))))))..))))))).)))))...	ENSG00000073331, ENSG00000251441	protein_coding, processed_pseudogene	yes	no	no	novel-mir-candidate-172-5p	112357244	112357268	CAUCCAGCAUCUGGCAGGACGUGCU	25	0.2	0.32	0.2	0.28	-4	novel-mir-candidate-172-3p	112357286	112357308	AGCCGGACUGCAGAAGCUGGCGG	23	0.217391	0.26087	0.0869565	0.434783	-9.1
novel-mir-candidate-420	1.2625	chr4	-	6681880	6681942	GCCCAGCUGCCCCACAGCCCCCAAAGACUUGGUGUGAUGAGCUCUGGAUGGCAGCUGGGAACG	63	0.206349	0.31746	0.15873	0.31746	-28.3	.(((((((((((((.(((..((((....))))........))).)))..))))))))))....			no	no	yes	novel-mir-candidate-420-5p	6681924	6681942	GCCCAGCUGCCCCACAGCC	19	0.157895	0.578947	0.0526316	0.210526	-4	novel-mir-candidate-420-3p	6681880	6681900	UCUGGAUGGCAGCUGGGAACG	21	0.190476	0.190476	0.190476	0.428571	-1.2
novel-mir-candidate-24	1.2626	chr2	+	238449874	238449947	AUACAGCAGACAUAGGACUGAGCCAAGGAAGAGUCUGCCUGAGAGAGACGCUUGGCCUGUGCUUUGCUGCCAUC	74	0.256757	0.243243	0.202703	0.297297	-26.2	...(((((((((((((.((((((.........((((.........)))))))))))))))).))))))).....	ENSG00000065802	protein_coding	yes	yes	no	novel-mir-candidate-24-5p	238449874	238449896	AUACAGCAGACAUAGGACUGAGC	23	0.391304	0.217391	0.130435	0.26087	-1.1	novel-mir-candidate-24-3p	238449924	238449947	CUUGGCCUGUGCUUUGCUGCCAUC	24	0.0416667	0.333333	0.375	0.25	-4.7
novel-mir-candidate-423	1.2643	chr6	+	149794653	149794706	CUCUAGUAGCCACAGCCAUCCCCUAGAGGGAUCUGGCUGAGGAGGAAGUGGAGG	54	0.240741	0.240741	0.166667	0.351852	-22.2	(((((....((.((((((((((.....))))..)))))).))......))))).	ENSG00000120265	protein_coding	yes	no	no	novel-mir-candidate-423-5p	149794653	149794676	CUCUAGUAGCCACAGCCAUCCCCU	24	0.208333	0.458333	0.208333	0.125	0	novel-mir-candidate-423-3p	149794685	149794706	CUGGCUGAGGAGGAAGUGGAGG	22	0.227273	0.0909091	0.136364	0.545455	-1.4
novel-mir-candidate-405	1.2645	chr18	+	37695212	37695267	GACCAUGCAAACAAGCCUGGACACCUUUAUAAUUUUCUUUGGGCUCAGCAUGGCAC	56	0.267857	0.267857	0.267857	0.196429	-14.1	..((((((.....((((((((................))))))))..))))))...			no	no	yes	novel-mir-candidate-405-5p	37695212	37695230	GACCAUGCAAACAAGCCUG	19	0.368421	0.315789	0.105263	0.210526	-0.7	novel-mir-candidate-405-3p	37695252	37695267	GGGCUCAGCAUGGCAC	16	0.1875	0.3125	0.125	0.375	-1.5
novel-mir-candidate-80	1.2645	chrX	-	155001067	155001136	UUCUCCAGUGUGGCUGCUCCUGAAAGGAACAAUGAGACUUUUGUUAUUUCACCACAAGACUGAGAAAGAA	70	0.314286	0.2	0.271429	0.214286	-15	(((((.(((((((.......(((((..(((((........))))).)))))))))...))))))))....	ENSG00000185010	protein_coding	yes	no	no	novel-mir-candidate-80-5p	155001116	155001136	UUCUCCAGUGUGGCUGCUCCU	21	0.047619	0.333333	0.380952	0.238095	-1.5	novel-mir-candidate-80-3p	155001067	155001086	ACCACAAGACUGAGAAAGAA	20	0.55	0.2	0.05	0.2	0
novel-mir-candidate-136	1.2674	chr19	-	4066048	4066104	UCGUAGUCCCUCCGCCGUUUGCAGCCGGCAGGUGGCAAGCGGCUUGGACUACAAGUC	57	0.157895	0.315789	0.210526	0.315789	-31.7	..(((((((....(((((((((.(((....))).)))))))))..))))))).....	ENSG00000178951	protein_coding	yes	no	no	novel-mir-candidate-136-5p	4066081	4066104	UCGUAGUCCCUCCGCCGUUUGCAG	24	0.0833333	0.375	0.291667	0.25	0	novel-mir-candidate-136-3p	4066048	4066069	CAAGCGGCUUGGACUACAAGUC	22	0.272727	0.272727	0.181818	0.272727	-6.2
novel-mir-candidate-427	1.2674	chr7	+	157412188	157412264	AAACCGCUGCAGAGUUGGAGACAGAACUGGAGUGAAAUUGCAAAGCAGGGUGGUUUUGGUCUCUGCAGAGGCCAUUU	77	0.272727	0.168831	0.233766	0.324675	-25.9	...((.((((((((...(((((....(((...((......))...)))....)))))...)))))))).))......	ENSG00000105993	protein_coding	yes	yes	no	novel-mir-candidate-427-5p	157412188	157412211	AAACCGCUGCAGAGUUGGAGACAG	24	0.333333	0.208333	0.125	0.333333	-2.5	novel-mir-candidate-427-3p	157412239	157412264	GGUUUUGGUCUCUGCAGAGGCCAUUU	26	0.115385	0.192308	0.384615	0.307692	-9.6
novel-mir-candidate-64	1.2698	chr20	-	48721226	48721289	UCUGUCCUGGGACGCUUGGUGUCCUGAUUGAUUUUGAGACAUCAGCUCCCCAAGGGCAGGGAUA	64	0.1875	0.234375	0.28125	0.296875	-28.4	((((((((((((.(((.((((((.(((......))).)))))))))))))..))))))))....	ENSG00000124126	protein_coding	yes	no	no	novel-mir-candidate-64-5p	48721265	48721289	UCUGUCCUGGGACGCUUGGUGUCCU	25	0.04	0.28	0.36	0.32	-8.2	novel-mir-candidate-64-3p	48721226	48721250	CAUCAGCUCCCCAAGGGCAGGGAUA	25	0.28	0.32	0.12	0.28	-4.8
novel-mir-candidate-173	1.2701	chrX	+	1395390	1395444	CAGCCUGCACUGGCUUGGUGGCUUGGUGACCCGCCAGCAGGGUGGUGCUGUCUGU	55	0.0909091	0.272727	0.254545	0.381818	-25.2	(((...((((((.((((.((((..((....)))))).)))).))))))...))).			no	no	yes	novel-mir-candidate-173-5p	1395390	1395411	CAGCCUGCACUGGCUUGGUGGC	22	0.0909091	0.318182	0.227273	0.363636	-5.6	novel-mir-candidate-173-3p	1395423	1395444	CCAGCAGGGUGGUGCUGUCUGU	22	0.0909091	0.227273	0.272727	0.409091	-6.4
novel-mir-candidate-372	1.2712	chr4	+	141707942	141708012	GCAAUGCCAAGCAUCCCUGUGGCAGUCUGUUGGAGAGGCAGAGCUGCUGCAGGACUGGAUGUCGGGCUGCA	71	0.197183	0.239437	0.197183	0.366197	-36.7	(((..(((..(((((((((((((((((((((.....)))))).)))))))))....))))))..)))))).	ENSG00000164136	protein_coding	yes	no	no	novel-mir-candidate-372-5p	141707942	141707960	GCAAUGCCAAGCAUCCCUG	19	0.263158	0.368421	0.157895	0.210526	-1.4	novel-mir-candidate-372-3p	141707992	141708012	AGGACUGGAUGUCGGGCUGCA	21	0.190476	0.190476	0.190476	0.428571	-2.6
novel-mir-candidate-73	1.2719	chr7	-	5527907	5527967	UCGGCUGUGGGGUCCUGUGGUGUGUGGGGAGCUGUCACAUCCAGGGUCCUCACUGCCUGUC	61	0.0819672	0.262295	0.278689	0.377049	-32.5	..(((.(((((((((((.(((((((((....))).))))))))))).)))))).)))....	ENSG00000075624	protein_coding	yes	no	no	novel-mir-candidate-73-5p	5527944	5527967	UCGGCUGUGGGGUCCUGUGGUGUG	24	0	0.166667	0.333333	0.5	-2.7	novel-mir-candidate-73-3p	5527907	5527930	CAUCCAGGGUCCUCACUGCCUGUC	24	0.125	0.416667	0.25	0.208333	-4.2
novel-mir-candidate-76	1.272	chr17	+	45411077	45411129	CCGUGCCUGUCCCCUCCUCUCUAAGGACCCAGAGAAGAGGGCCAGGCACCAGC	53	0.207547	0.396226	0.132075	0.264151	-27.7	..(((((((..(((((.(((((........))))).))))).)))))))....	ENSG00000159314	protein_coding	yes	no	no	novel-mir-candidate-76-5p	45411077	45411098	CCGUGCCUGUCCCCUCCUCUCU	22	0	0.545455	0.318182	0.136364	0	novel-mir-candidate-76-3p	45411108	45411129	GAGAAGAGGGCCAGGCACCAGC	22	0.318182	0.272727	0	0.409091	-2.3	ptr-miR-550_MIMAT0008230
novel-mir-candidate-22	1.2726	chr17	+	78140753	78140816	CAGAGUUGCUGCCGCUGCUGUCCUCACACCCGCUCGUGGGAAGCAGCGCCUGUCGCAACUCGCC	64	0.140625	0.390625	0.1875	0.28125	-30.7	..(((((((.(((((((((.(((.(((........)))))))))))))...)).)))))))...	ENSG00000167895	protein_coding	yes	no	no	novel-mir-candidate-22-5p	78140753	78140778	CAGAGUUGCUGCCGCUGCUGUCCUCA	26	0.115385	0.346154	0.269231	0.269231	-3.7	novel-mir-candidate-22-3p	78140793	78140816	AAGCAGCGCCUGUCGCAACUCGCC	24	0.208333	0.416667	0.125	0.25	-2.1
novel-mir-candidate-232	1.2733	chr10	-	113291630	113291682	ACAGGCCCAACAUGAUCCAUAUCCCCAGGGAAAUGAAUCAUGUUGGGCCUGUA	53	0.301887	0.264151	0.207547	0.226415	-36.3	((((((((((((((((.(((.(((....))).))).)))))))))))))))).			no	no	yes	novel-mir-candidate-232-5p	113291659	113291682	ACAGGCCCAACAUGAUCCAUAUCC	24	0.333333	0.375	0.166667	0.125	0	novel-mir-candidate-232-3p	113291630	113291652	AAAUGAAUCAUGUUGGGCCUGUA	23	0.304348	0.130435	0.304348	0.26087	0
novel-mir-candidate-191	1.278	chr16	+	57639448	57639513	UUCUCAGCCUCUAUUCCCUGGCUGUCCCCUUUGUUUGAAGCUCCAGUGAGGGAGCAGUGGCUGGGG	66	0.121212	0.272727	0.30303	0.30303	-31.7	..(((((((.((.((((((.((((....((((....))))...)))).)))))).)).))))))).	ENSG00000205336	protein_coding	yes	yes	no	novel-mir-candidate-191-5p	57639448	57639470	UUCUCAGCCUCUAUUCCCUGGCU	23	0.0869565	0.391304	0.391304	0.130435	-4.2	novel-mir-candidate-191-3p	57639493	57639513	GUGAGGGAGCAGUGGCUGGGG	21	0.142857	0.0952381	0.142857	0.619048	-2
novel-mir-candidate-153	1.2815	chr16	-	28905877	28905931	AGCGGGGAGGGGAGAGAGGCUGGCCUUGACCUCUCUUUCUUUCCUUCCCACAGAG	55	0.163636	0.272727	0.236364	0.327273	-27.1	...((((((((((((((((..((......))..))))))))))))))))......	ENSG00000177548	protein_coding	yes	no	no	novel-mir-candidate-153-5p	28905909	28905931	AGCGGGGAGGGGAGAGAGGCUGG	23	0.217391	0.0869565	0.0434783	0.652174	-1.2	novel-mir-candidate-153-3p	28905877	28905900	UCUCUUUCUUUCCUUCCCACAGAG	24	0.125	0.375	0.416667	0.0833333	0
novel-mir-candidate-79	1.2817	chr10	+	48966435	48966525	CCAGAGACAGGGUGCAGCUACAGUGUGCACAGGGACGACCCCUCCUCUGGGCAUCUCUCCCCUCAUGUGUGUCUGUUCCCUGUCUCUCUAG	91	0.153846	0.340659	0.252747	0.252747	-38.6	..((((((((((.((((.((((..(((....((((.((.(((......)))..))..))))..))).)))).)))).))))))))))....	ENSG00000128815, ENSG00000283652	protein_coding, protein_coding	no	no	no	novel-mir-candidate-79-5p	48966435	48966457	CCAGAGACAGGGUGCAGCUACAG	23	0.304348	0.26087	0.0869565	0.347826	-0.1	novel-mir-candidate-79-3p	48966504	48966525	UGUCUGUUCCCUGUCUCUCUAG	22	0.0454545	0.318182	0.454545	0.181818	0
novel-mir-candidate-344	1.2832	chr2	-	231188671	231188726	GUCUCAGUGCCGAAGUGGGUGGAGGGUGUGUGGUCCCAUGGGGGCACUGGGGCUGA	56	0.125	0.178571	0.214286	0.482143	-28.1	(((((((((((...(((((...............)))))...)))))))))))...			no	no	yes	novel-mir-candidate-344-5p	231188708	231188726	GUCUCAGUGCCGAAGUGGG	19	0.157895	0.210526	0.210526	0.421053	-0.5	novel-mir-candidate-344-3p	231188671	231188689	AUGGGGGCACUGGGGCUGA	19	0.157895	0.157895	0.157895	0.526316	-1.8
novel-mir-candidate-415	1.2876	chr16	-	67826571	67826639	UCCCUGUCACCUCUGGACCUGCAGAGGACUCUGGAUCUGAAGACCAUGCUGGGCCAGAGUGGCUGGUGA	69	0.188406	0.275362	0.217391	0.318841	-27.5	((((.(((((.(((((.((((((..((..(((........))))).))).))))))))))))).)).))	ENSG00000102904	protein_coding	yes	no	no	novel-mir-candidate-415-5p	67826619	67826639	UCCCUGUCACCUCUGGACCUG	21	0.0952381	0.428571	0.285714	0.190476	-0.8	novel-mir-candidate-415-3p	67826571	67826594	AUGCUGGGCCAGAGUGGCUGGUGA	24	0.166667	0.166667	0.208333	0.458333	-5.9	ppy-miR-339-5p_MIMAT0015842
novel-mir-candidate-180	1.2879	chr3	+	49714032	49714090	GCUGGAGGGAGAGGGUGCGCUGUCCCAUUGACCUGGGCACUGACCCCCACCUCCACAGG	59	0.169492	0.338983	0.152542	0.338983	-23.9	..((((((....((((.((.((.((((......)))))).))))))...))))))....	ENSG00000164068	protein_coding	no	no	no	novel-mir-candidate-180-5p	49714032	49714054	GCUGGAGGGAGAGGGUGCGCUGU	23	0.130435	0.130435	0.173913	0.565217	-0.3	novel-mir-candidate-180-3p	49714068	49714090	GCACUGACCCCCACCUCCACAGG	23	0.217391	0.521739	0.0869565	0.173913	-0.4
novel-mir-candidate-5	1.2937	chr7	-	90186984	90187039	UGAUAAUGUUUGAAUGUAGUGUUAAAACCUGUUAAAAUACUCAUUGCUGAUCACUC	56	0.321429	0.142857	0.375	0.160714	-5.5	((((...((...((((.((((((............))))))))))))..))))...	ENSG00000227646, ENSG00000157214	processed_transcript, protein_coding	yes	no	no	novel-mir-candidate-5-5p	90187021	90187039	UGAUAAUGUUUGAAUGUAG	19	0.315789	0	0.421053	0.263158	0	novel-mir-candidate-5-3p	90186984	90187002	UACUCAUUGCUGAUCACUC	19	0.210526	0.315789	0.368421	0.105263	0
novel-mir-candidate-330	1.2953	chr2	+	221220997	221221041	CUGCACAGUGGCUAAGUUUCAGGACCAGCUCAGCCACUGCACAGC	45	0.244444	0.333333	0.177778	0.244444	-18.8	(((..((((((((.((((........)))).))))))))..))).			no	no	yes	novel-mir-candidate-330-5p	221220997	221221015	CUGCACAGUGGCUAAGUUU	19	0.210526	0.210526	0.315789	0.263158	-0.6	novel-mir-candidate-330-3p	221221023	221221041	AGCUCAGCCACUGCACAGC	19	0.263158	0.421053	0.105263	0.210526	-2.3
novel-mir-candidate-236	1.2982	chr14	+	71705671	71705722	GAGCGUCAGUCCUGCUCCAGCCAUGAGAGGGCUCCAGCAGGACUGAUGCUCC	52	0.192308	0.326923	0.173077	0.307692	-37.1	((((((((((((((((..((((.......))))..)))))))))))))))).	ENSG00000197555	protein_coding	yes	no	no	novel-mir-candidate-236-5p	71705671	71705692	GAGCGUCAGUCCUGCUCCAGCC	22	0.136364	0.409091	0.181818	0.272727	-4.4	novel-mir-candidate-236-3p	71705701	71705722	GCUCCAGCAGGACUGAUGCUCC	22	0.181818	0.363636	0.181818	0.272727	-3.9
novel-mir-candidate-72	1.3037	chr5	-	177514853	177514909	UAGGCUGGCCUGGAGGGCAGGCCAGAGAUUGGGGCUGCCAUCUGGUGCCAGCCUUUG	57	0.140351	0.245614	0.210526	0.403509	-36.7	.(((((((((((((.(((((.((........)).))))).))))).))))))))...	ENSG00000183258	protein_coding	yes	no	no	novel-mir-candidate-72-5p	177514887	177514909	UAGGCUGGCCUGGAGGGCAGGCC	23	0.130435	0.26087	0.130435	0.478261	-10.7	novel-mir-candidate-72-3p	177514853	177514875	CUGCCAUCUGGUGCCAGCCUUUG	23	0.0869565	0.347826	0.304348	0.26087	-2.3
novel-mir-candidate-327	1.3051	chr12	-	132675516	132675598	CCUGGGUCUGAGGGAGGAAUGGAGAAAGGGGCAUUAGAGCCUGACCUGCCCACUUGCUUGUCUGUCCUCUUUCCAACCCAGGC	83	0.192771	0.277108	0.228916	0.301205	-39.8	(((((((..(((((((((...(((.((((((((((((...))))..))))).))).))).....)))))))))..))))))).	ENSG00000177084	protein_coding	no	no	no	novel-mir-candidate-327-5p	132675580	132675598	CCUGGGUCUGAGGGAGGAA	19	0.210526	0.157895	0.157895	0.473684	-2.2	novel-mir-candidate-327-3p	132675516	132675538	UCUGUCCUCUUUCCAACCCAGGC	23	0.130435	0.434783	0.304348	0.130435	0
novel-mir-candidate-227	1.3053	chr10	+	43471237	43471296	CUGGCUGGCUGCUCCGGGCACUGGCAGGAGCAAGCUCCGUGUCCAGAAUGGCCAGCCAGA	60	0.183333	0.316667	0.15	0.35	-35.6	(((((((((((.((.((((((.....((((....)))))))))).)).))))))))))).	ENSG00000243660	protein_coding	yes	no	no	novel-mir-candidate-227-5p	43471237	43471258	CUGGCUGGCUGCUCCGGGCACU	22	0.0454545	0.363636	0.227273	0.363636	-6.2	novel-mir-candidate-227-3p	43471273	43471296	CCGUGUCCAGAAUGGCCAGCCAGA	24	0.25	0.333333	0.125	0.291667	-2
novel-mir-candidate-110	1.3094	chr2	-	127048632	127048687	UGUGGGGUGGAGCCCCUUGCUCAUCCCUGUGCGACCUGGUGCUCUGCCCCUCAGGA	56	0.0892857	0.339286	0.25	0.321429	-27.4	((.((((((((((((.((((.((....)).))))...)).)))))))))).))...	ENSG00000136717	protein_coding	no	no	no	novel-mir-candidate-110-5p	127048666	127048687	UGUGGGGUGGAGCCCCUUGCUC	22	0.0454545	0.272727	0.272727	0.409091	-7.7	novel-mir-candidate-110-3p	127048632	127048653	CCUGGUGCUCUGCCCCUCAGGA	22	0.0909091	0.409091	0.227273	0.272727	-5.1
novel-mir-candidate-311	1.3155	chr20	+	12459890	12459958	UCAAAUGAGAACCCAGAUAUCUGGUAUUCAAAUAAGAUACGACAGAUAUCUGGUAUAUCUCAUUUGAAC	69	0.376812	0.173913	0.289855	0.15942	-30.1	((((((((((..((((((((((((((((.......)))))..)))))))))))....))))))))))..			no	no	yes	novel-mir-candidate-311-5p	12459890	12459913	UCAAAUGAGAACCCAGAUAUCUGG	24	0.375	0.208333	0.208333	0.208333	-3.7	novel-mir-candidate-311-3p	12459935	12459958	AUAUCUGGUAUAUCUCAUUUGAAC	24	0.291667	0.166667	0.416667	0.125	0
novel-mir-candidate-148	1.3161	chr9	-	93566816	93566877	UGCUGGGACUCGGGCUCCCAGGGUCUGCUCGGUCUCUCUCGGGGCACUCGGGUCUUUGCUGG	62	0.0483871	0.306452	0.274194	0.370968	-25.3	.((.((((((((((((((.((((.((....)).))))...)))))..))))))))).))...			no	no	yes	novel-mir-candidate-148-5p	93566855	93566877	UGCUGGGACUCGGGCUCCCAGGG	23	0.0869565	0.304348	0.173913	0.434783	-8.8	novel-mir-candidate-148-3p	93566816	93566839	UCGGGGCACUCGGGUCUUUGCUGG	24	0.0416667	0.25	0.291667	0.416667	-2.7
novel-mir-candidate-437	1.3172	chr4	-	99326171	99326258	GUGGUAUCUGAGAAGCUGAUGCUCUCACCCUGAGAAGAGGGAAGGGAUUCCCCAGGAUGAGGGUGAGGAGGCUCCAGGAUGGCAGGUG	88	0.238636	0.181818	0.181818	0.397727	-33.6	....((((((.....(((..(((((((((((.......(((((....))))).......))))))))..)))..))).....))))))			no	no	yes	novel-mir-candidate-437-5p	99326241	99326258	GUGGUAUCUGAGAAGCUG	18	0.222222	0.111111	0.277778	0.388889	0	novel-mir-candidate-437-3p	99326171	99326189	GGCUCCAGGAUGGCAGGUG	19	0.157895	0.210526	0.157895	0.473684	-1.6
novel-mir-candidate-10	1.3198	chr15	-	78945001	78945044	UUGACGCUCUGGGCCGCCACCUCCGCGGACCCUGAGCGCAAGAG	44	0.159091	0.386364	0.136364	0.318182	-23.2	(((.(((((.(((((((.......)))).))).))))))))...	ENSG00000103811	protein_coding	yes	no	no	novel-mir-candidate-10-5p	78945023	78945044	UUGACGCUCUGGGCCGCCACCU	22	0.0909091	0.409091	0.227273	0.272727	-2.2	novel-mir-candidate-10-3p	78945001	78945022	CCGCGGACCCUGAGCGCAAGAG	22	0.227273	0.363636	0.0454545	0.363636	-3.1
novel-mir-candidate-384	1.3207	chr17	+	42565824	42565899	GCCGGGUUGUGGGGAAGGAGUCUCCAGUGGGUACUGCCUGACCCUGCCCUCUCUUCCUCCCAACAUCCUGGCCUGU	76	0.118421	0.342105	0.25	0.289474	-31.3	((((((.(((.((((.((((........((((........))))........)))).)))).))).))))))....	ENSG00000068120	protein_coding	yes	no	no	novel-mir-candidate-384-5p	42565824	42565845	GCCGGGUUGUGGGGAAGGAGUC	22	0.136364	0.136364	0.181818	0.545455	-1.6	novel-mir-candidate-384-3p	42565879	42565899	CCUCCCAACAUCCUGGCCUGU	21	0.142857	0.47619	0.238095	0.142857	-1.2	ptr-miR-150_MIMAT0008044
novel-mir-candidate-287	1.3227	chr19	+	51799943	51800005	GUAGCCCAUGGCUCGAUCCUCAGCUCUACCUCCAUCUUGCUGAUGAUAGGGCCAUGGGCCACC	63	0.174603	0.349206	0.238095	0.238095	-33.7	((.(((((((((((.(((.(((((..............))))).))).))))))))))).)).	ENSG00000171051, ENSG00000187474	protein_coding, protein_coding	yes	no	no	novel-mir-candidate-287-5p	51799943	51799966	GUAGCCCAUGGCUCGAUCCUCAGC	24	0.166667	0.375	0.208333	0.25	-3.4	novel-mir-candidate-287-3p	51799982	51800005	CUGAUGAUAGGGCCAUGGGCCACC	24	0.208333	0.291667	0.166667	0.333333	-6
novel-mir-candidate-31	1.3248	chrX	+	129792935	129792987	CUAGGCAGGGGUGGCUGGUAAGCAGCUGUGCCGAUGGCCUGCCUCUGCCUACA	53	0.150943	0.283019	0.207547	0.358491	-28.6	.((((((((((((((((....(((....)))...))))).)))))))))))..	ENSG00000122122	protein_coding	yes	no	no	novel-mir-candidate-31-5p	129792935	129792958	CUAGGCAGGGGUGGCUGGUAAGCA	24	0.208333	0.166667	0.166667	0.458333	-5.7	novel-mir-candidate-31-3p	129792965	129792987	CCGAUGGCCUGCCUCUGCCUACA	23	0.130435	0.434783	0.217391	0.217391	-3.2
novel-mir-candidate-339	1.3308	chr1	+	148357174	148357236	AACACUCAUCAACUGUGCCUGACAUGCCAAGUGCCACAUGUCAGGCACAGACAAUGAGUGUGC	63	0.301587	0.285714	0.190476	0.222222	-36	.((((((((...((((((((((((((..........))))))))))))))...))))))))..			no	no	yes	novel-mir-candidate-339-5p	148357174	148357197	AACACUCAUCAACUGUGCCUGACA	24	0.333333	0.333333	0.208333	0.125	-1.1	novel-mir-candidate-339-3p	148357213	148357236	GUCAGGCACAGACAAUGAGUGUGC	24	0.291667	0.208333	0.166667	0.333333	-4.5
novel-mir-candidate-126	1.3324	chr19	+	17778075	17778137	CCCCAGGGUGGGAUGAGGCUUGGGAAAAAUAGAAGCAGCCCUCUUGGCCUCACCCUCUCUAGC	63	0.222222	0.301587	0.190476	0.285714	-23	....((((.(((.(((((((.(((..............)))....)))))))))).))))...	ENSG00000130475	protein_coding	no	no	no	novel-mir-candidate-126-5p	17778075	17778097	CCCCAGGGUGGGAUGAGGCUUGG	23	0.130435	0.217391	0.173913	0.478261	-4.3	novel-mir-candidate-126-3p	17778113	17778137	CCCUCUUGGCCUCACCCUCUCUAGC	25	0.08	0.52	0.28	0.12	-0.5
novel-mir-candidate-6	1.333	chr18	-	3448120	3448161	CUUCGAAAGCGGCUUCGGCUGCCUCGGCCGCUUUCGAAGCCA	42	0.142857	0.357143	0.214286	0.285714	-24.9	((((((((((((((..((...))..))))))))))))))...	ENSG00000177426	protein_coding	yes	no	no	novel-mir-candidate-6-5p	3448141	3448161	CUUCGAAAGCGGCUUCGGCUG	21	0.142857	0.285714	0.238095	0.333333	-3.4	novel-mir-candidate-6-3p	3448120	3448140	CCUCGGCCGCUUUCGAAGCCA	21	0.142857	0.428571	0.190476	0.238095	-2.7
novel-mir-candidate-213	1.3392	chr8	-	41201559	41201634	UCAGGCUCAGUCCCCUCCAUGAUGGGCUCCCCACAAGCAUGUGGGCAGCCCAUGAGGUCAGUGUGCUCCCUGGGGA	76	0.171053	0.328947	0.197368	0.302632	-31.9	((((((.((....((((....(((((((.((((((....)))))).)))))))))))....)).))...))))...			no	no	yes	novel-mir-candidate-213-5p	41201611	41201634	UCAGGCUCAGUCCCCUCCAUGAUG	24	0.166667	0.375	0.25	0.208333	-0.7	novel-mir-candidate-213-3p	41201559	41201579	GGUCAGUGUGCUCCCUGGGGA	21	0.0952381	0.238095	0.238095	0.428571	-1.5	ptr-miR-484_MIMAT0008158
novel-mir-candidate-321	1.3395	chr22	-	50047623	50047669	AUGGUACAGGCCUGGGGGCUUCGGUCCUGGGGACUGUAAGCUCUGGG	47	0.12766	0.212766	0.234043	0.425532	-19.8	...........((.(((((((((((((...)))))).))))))).))	ENSG00000138892	protein_coding	yes	no	no	novel-mir-candidate-321-5p	50047648	50047669	AUGGUACAGGCCUGGGGGCUUC	22	0.136364	0.227273	0.227273	0.409091	-4.9	novel-mir-candidate-321-3p	50047623	50047642	UGGGGACUGUAAGCUCUGGG	20	0.15	0.15	0.25	0.45	-1.8
novel-mir-candidate-165	1.3416	chr9	-	36840635	36840700	UGGAGGAGACUGGUGGAAAGGGGACCCCGGAUCUGACCUCGGUGCUCUCUCCCGUCUCUUCCAGGC	66	0.151515	0.30303	0.212121	0.333333	-30	((((((((((....(((.((((.(((..((......))..))).)))).))).))))))))))...	ENSG00000196092	protein_coding	no	no	no	novel-mir-candidate-165-5p	36840677	36840700	UGGAGGAGACUGGUGGAAAGGGGA	24	0.291667	0.0416667	0.125	0.541667	0	novel-mir-candidate-165-3p	36840635	36840658	UGCUCUCUCCCGUCUCUUCCAGGC	24	0.0416667	0.458333	0.333333	0.166667	-0.8
novel-mir-candidate-342	1.3427	chr19	+	16087958	16088027	GUCUGCAGUGGAUGGGAGAGGACACGGCUGGUGGGGAUCGGGCUCAGCUGGGCCUUUCUGUCUCUGCAGG	70	0.128571	0.214286	0.228571	0.428571	-31.1	..((((((.(((..(((((((...((((((((.........)).))))))..))))))).))))))))).	ENSG00000167460	protein_coding	no	no	no	novel-mir-candidate-342-5p	16087958	16087980	GUCUGCAGUGGAUGGGAGAGGAC	23	0.217391	0.130435	0.173913	0.478261	-0.7	novel-mir-candidate-342-3p	16088004	16088027	GCUGGGCCUUUCUGUCUCUGCAGG	24	0.0416667	0.291667	0.333333	0.333333	-4.4
novel-mir-candidate-230	1.3452	chr9	-	136529531	136529595	UGGGGAGGCCAGGGAAGGGGCUGUGAGCAACGAGGUUCCAGCAUCUUCCCAAGCCUCCUCCAUCC	65	0.2	0.307692	0.169231	0.323077	-39.3	(((((((((..(((((((.((((.((((......)))))))).)))))))..)))))).)))...	ENSG00000148400	protein_coding	yes	no	no	novel-mir-candidate-230-5p	136529574	136529595	UGGGGAGGCCAGGGAAGGGGCU	22	0.181818	0.136364	0.0909091	0.590909	-4.5	novel-mir-candidate-230-3p	136529531	136529554	CAUCUUCCCAAGCCUCCUCCAUCC	24	0.166667	0.541667	0.25	0.0416667	0
novel-mir-candidate-201	1.3483	chr1	+	114135004	114135065	GAGUCCUUACCUGGCAGGGUGAUGAGCCUGCUCCUGAGAACUCUACCUGCUGGUGGGGCUGU	62	0.145161	0.258065	0.258065	0.33871	-23	.((((((.(((.((((((.....(((.((.......))..)))..)))))))))))))))..	ENSG00000134207	protein_coding	yes	no	no	novel-mir-candidate-201-5p	114135004	114135022	GAGUCCUUACCUGGCAGGG	19	0.157895	0.263158	0.210526	0.368421	-1.5	novel-mir-candidate-201-3p	114135045	114135065	UCUACCUGCUGGUGGGGCUGU	21	0.047619	0.238095	0.333333	0.380952	-6.9	ptr-miR-370_MIMAT0008120
novel-mir-candidate-426	1.3512	chr12	+	9135447	9135495	GUGCUGUAUGAAAGCCCCACCAGCAGGGGGUAGCACUCAAAACAGCACC	49	0.306122	0.306122	0.122449	0.265306	-19.8	(((((((.(((..(((((.((....)))))..))..)))..))))))).	ENSG00000256720	processed_pseudogene	no	no	no	novel-mir-candidate-426-5p	9135447	9135466	GUGCUGUAUGAAAGCCCCAC	20	0.25	0.3	0.2	0.25	-1.8	novel-mir-candidate-426-3p	9135477	9135495	UAGCACUCAAAACAGCACC	19	0.421053	0.368421	0.105263	0.105263	0
novel-mir-candidate-432	1.3579	chr11	-	74007108	74007158	UCUCUGGCCUGUCUCCUGCAGCCCCACCGCUGCACUGAAGCCCAGGGCUGU	51	0.117647	0.411765	0.215686	0.254902	-18.5	.((((((.((.((...((((((......))))))..)))).))))))....	ENSG00000175564	protein_coding	no	yes	no	novel-mir-candidate-432-5p	74007139	74007158	UCUCUGGCCUGUCUCCUGCA	20	0.05	0.4	0.35	0.2	0	novel-mir-candidate-432-3p	74007108	74007129	CUGCACUGAAGCCCAGGGCUGU	22	0.181818	0.318182	0.181818	0.318182	-4.1
novel-mir-candidate-25	1.3619	chr7	-	116210552	116210614	UGCGGAACUCCCGCGGCGCCGCUCAACAGCCACUCGCCCGGCGCCGUCGAACUUCCGCCGCCC	63	0.126984	0.492063	0.111111	0.269841	-26	.((((((....((((((((((.................)))))))).))...)))))).....	ENSG00000279086, ENSG00000135269	TEC, protein_coding	no	yes	no	novel-mir-candidate-25-5p	116210592	116210614	UGCGGAACUCCCGCGGCGCCGCU	23	0.0869565	0.434783	0.130435	0.347826	-6.9	novel-mir-candidate-25-3p	116210552	116210573	CGCCGUCGAACUUCCGCCGCCC	22	0.0909091	0.545455	0.136364	0.227273	-1.3
novel-mir-candidate-270	1.362	chr2	-	17753270	17753330	GUCCCCAGACUCUCCCGGGCUGUGGCGAAUAACUGUAAAGCGGGGAGAGGUCUGGGGAAAG	61	0.229508	0.229508	0.163934	0.377049	-34.2	.(((((((((((((((..(((...(((......)))..))).)))))).)))))))))...	ENSG00000163029	protein_coding	yes	no	no	novel-mir-candidate-270-5p	17753310	17753330	GUCCCCAGACUCUCCCGGGCU	21	0.0952381	0.47619	0.190476	0.238095	-2.9	novel-mir-candidate-270-3p	17753270	17753293	AAGCGGGGAGAGGUCUGGGGAAAG	24	0.291667	0.0833333	0.0833333	0.541667	-2.1
novel-mir-candidate-58	1.3641	chr19	+	52269690	52269750	CCCGGGAUGUGGGGGGCGGUACAGACCUUGAAAUCCCCGCACCGCUCUCUCCACCCCGAGU	61	0.163934	0.377049	0.163934	0.295082	-23.9	..((((.((.((((((((((....................)))))))))).)).))))...	ENSG00000196214	protein_coding	yes	no	no	novel-mir-candidate-58-5p	52269690	52269712	CCCGGGAUGUGGGGGGCGGUACA	23	0.130435	0.217391	0.130435	0.521739	-4.8	novel-mir-candidate-58-3p	52269728	52269750	GCACCGCUCUCUCCACCCCGAGU	23	0.130435	0.521739	0.173913	0.173913	-1.7
novel-mir-candidate-367	1.3664	chr16	-	12529608	12529684	GGGGGCGGCGGCGGGGGAAACCCAGACUGGGUUUUCUGCUGAAAAUCCAGUUGGGAAUUUGUGCUGUGACCUACAUU	77	0.194805	0.194805	0.246753	0.363636	-34.6	..(((..((((((.(((...(((((.((((((((((....)))))))))))))))..))).))))))..))).....	ENSG00000048471	protein_coding	yes	no	no	novel-mir-candidate-367-5p	12529665	12529684	GGGGGCGGCGGCGGGGGAAA	20	0.15	0.15	0	0.7	-1.8	novel-mir-candidate-367-3p	12529608	12529627	UUUGUGCUGUGACCUACAUU	20	0.15	0.2	0.45	0.2	-0.3
novel-mir-candidate-428	1.3718	chr19	-	51108344	51108406	UCCGGGCCAGGCUUCCGCGUGGUGGGCAGUGUGGGCAUCCCAGCACUGAGUUCUGCCCGGGUG	63	0.0952381	0.301587	0.206349	0.396825	-29.3	(((((((.(((.(((...(((.((((..((....))..)))).))).))).))))))))))..	ENSG00000142544	protein_coding	no	no	no	novel-mir-candidate-428-5p	51108387	51108406	UCCGGGCCAGGCUUCCGCGU	20	0.05	0.4	0.2	0.35	-2.1	novel-mir-candidate-428-3p	51108344	51108366	CAGCACUGAGUUCUGCCCGGGUG	23	0.130435	0.304348	0.217391	0.347826	-1.8
novel-mir-candidate-434	1.3731	chr8	-	20394963	20395032	GUUUGGGUCUGAGCUGUGAGACUGAGCUAUGAUGGUUCUCUUCUUCCCUCCUCUGCACAGCCCAGCCUCA	70	0.142857	0.3	0.314286	0.242857	-21	....(((.(((.(((((((((..(((....((.((....))))....))).))).)))))).))))))..			no	no	yes	novel-mir-candidate-434-5p	20395014	20395032	GUUUGGGUCUGAGCUGUGA	19	0.105263	0.105263	0.368421	0.421053	-0.5	novel-mir-candidate-434-3p	20394963	20394982	CUCUGCACAGCCCAGCCUCA	20	0.2	0.5	0.15	0.15	-0.2
novel-mir-candidate-23	1.3791	chr19	+	57439110	57439171	UUUAGUGGCUCCCUCUGCCUGCAGAAUGGAAGACCACGUGCAGGUGAGGGUGGAGCCACCGA	62	0.209677	0.258065	0.193548	0.33871	-35.3	....(((((((((((((((((((...(((....)))..))))))).)))).))))))))...	ENSG00000186230, ENSG00000268163	protein_coding, protein_coding	yes	no	no	novel-mir-candidate-23-5p	57439110	57439132	UUUAGUGGCUCCCUCUGCCUGCA	23	0.0869565	0.347826	0.347826	0.217391	-4.4	novel-mir-candidate-23-3p	57439149	57439171	GCAGGUGAGGGUGGAGCCACCGA	23	0.217391	0.217391	0.0869565	0.478261	-5.1
novel-mir-candidate-408	1.3796	chr9	+	30688956	30689021	UGCAGUAGUGCUAGCGGCUUCACGGUUCGGUCCUCGGACCCGGCAGCCGCCACUGGUGCUGAGCUG	66	0.121212	0.318182	0.212121	0.348485	-29.7	.(((.(((((...((((((....((((((.....))))))....))))))))))).))).......			no	no	yes	novel-mir-candidate-408-5p	30688956	30688974	UGCAGUAGUGCUAGCGGCU	19	0.157895	0.210526	0.263158	0.368421	-2.2	novel-mir-candidate-408-3p	30689003	30689021	CGCCACUGGUGCUGAGCUG	19	0.105263	0.315789	0.210526	0.368421	-2.2	ptr-miR-199a-3p_MIMAT0009192
novel-mir-candidate-351	1.3852	chr7	+	2362575	2362635	GUGGGGCGGACAGCGCAUACCUGCCUAGCCUUACAGUGUGGGUAUGUGCCAACGGCCCUCU	61	0.163934	0.295082	0.213115	0.327869	-28.8	..(((.((....((((((((((((((........)).))))))))))))...)).)))...	ENSG00000106263	protein_coding	yes	no	no	novel-mir-candidate-351-5p	2362575	2362599	GUGGGGCGGACAGCGCAUACCUGCC	25	0.16	0.32	0.12	0.4	-7.5	novel-mir-candidate-351-3p	2362612	2362635	GUGGGUAUGUGCCAACGGCCCUCU	24	0.125	0.291667	0.25	0.333333	-6.5
novel-mir-candidate-397	1.3856	chr17	-	61341502	61341589	ACUGAACUUGGAGUCAGAAGACCAGGAUCCAUCAGCAGCGGGCUGAGUGCCACUGCACCAGUGUUCCGGCUCCACCAGCUUCAGUGUC	88	0.227273	0.306818	0.193182	0.272727	-31.4	(((((((((((((((.(((.((..((........((((..(((.....))).)))).)).)).))).)))))))..)).))))))...	ENSG00000141376	protein_coding	yes	no	no	novel-mir-candidate-397-5p	61341564	61341589	ACUGAACUUGGAGUCAGAAGACCAGG	26	0.346154	0.192308	0.153846	0.307692	-3.6	novel-mir-candidate-397-3p	61341502	61341524	CCGGCUCCACCAGCUUCAGUGUC	23	0.130435	0.434783	0.217391	0.217391	-2.1
novel-mir-candidate-265	1.3873	chr2	-	197294293	197294375	UCAACAUGUCAUCUUUCAUAUAAAGGUUCACUUUUCUCAGAAGUGAAACUAACUUCUAUAUGAAAGAUGACACGUGUUGACUG	83	0.325301	0.180723	0.337349	0.156627	-35.1	((((((((((((((((((((((.((((((((((((...)))))))).....)))).))))))))))))))))..))))))...	ENSG00000065413, ENSG00000283224, ENSG00000236977	protein_coding, protein_coding, sense_intronic	yes	no	no	novel-mir-candidate-265-5p	197294355	197294375	UCAACAUGUCAUCUUUCAUAU	21	0.285714	0.238095	0.428571	0.047619	0	novel-mir-candidate-265-3p	197294293	197294315	UGAAAGAUGACACGUGUUGACUG	23	0.304348	0.130435	0.26087	0.304348	0
novel-mir-candidate-183	1.3899	chr1	+	231922655	231922713	GUGACCCCACCCAGCCCUCCAGGCCAGCCAGGAUAACCCUGGAGGGCUGGAGGGGGACA	59	0.220339	0.355932	0.0847458	0.338983	-39.9	....((((..(((((((((((((((.....)).....)))))))))))))..))))...	ENSG00000162946	protein_coding	yes	no	no	novel-mir-candidate-183-5p	231922655	231922677	GUGACCCCACCCAGCCCUCCAGG	23	0.173913	0.521739	0.0869565	0.217391	-1	novel-mir-candidate-183-3p	231922692	231922713	CCUGGAGGGCUGGAGGGGGACA	22	0.181818	0.181818	0.0909091	0.545455	-1.7
novel-mir-candidate-151	1.3923	chr14	+	68815148	68815208	CACAGCCUCAAGCUCGGCCAAGGCCCCAGGAGCUUCCUUGGUUGGACCUUGGGGCUGGACC	61	0.163934	0.344262	0.180328	0.311475	-29.7	..((((((((((.((((((((((((...)).....))))))))))..))))))))))....			no	no	yes	novel-mir-candidate-151-5p	68815148	68815170	CACAGCCUCAAGCUCGGCCAAGG	23	0.26087	0.391304	0.0869565	0.26087	-3.6	novel-mir-candidate-151-3p	68815184	68815208	CUUGGUUGGACCUUGGGGCUGGACC	25	0.08	0.24	0.28	0.4	-3.8
novel-mir-candidate-120	1.3927	chr19	+	42333544	42333605	GCAGGGAGGUGUGGGGAGAAGGUCCGCUUUAGAGCUUGGUCCCUCUGUGCUCACCUCCCAGC	62	0.145161	0.274194	0.225806	0.354839	-27.4	((.((((((((.....(((.((.(((((....)))..)).)).))).....)))))))).))	ENSG00000105429	protein_coding	no	no	no	novel-mir-candidate-120-5p	42333544	42333567	GCAGGGAGGUGUGGGGAGAAGGUC	24	0.208333	0.0833333	0.125	0.583333	-0.5	novel-mir-candidate-120-3p	42333582	42333605	GUCCCUCUGUGCUCACCUCCCAGC	24	0.0833333	0.5	0.25	0.166667	-0.1
novel-mir-candidate-267	1.3965	chr11	+	65021646	65021721	UGGGGAGGGAAGGGGCUGACGGCAGGCAGGGUCUGCAGUCACUGGCCACCACCAUCAGCACCUUUGUCCUCCCAGG	76	0.184211	0.302632	0.157895	0.355263	-34.9	..(((((((((((((((((.((..((...((((..........)))).)).)).))))).))))).)))))))...	ENSG00000213465, ENSG00000273003	protein_coding, protein_coding	yes	no	no	novel-mir-candidate-267-5p	65021646	65021669	UGGGGAGGGAAGGGGCUGACGGCA	24	0.208333	0.125	0.0833333	0.583333	-1	novel-mir-candidate-267-3p	65021700	65021721	UCAGCACCUUUGUCCUCCCAGG	22	0.136364	0.409091	0.272727	0.181818	0
novel-mir-candidate-162	1.3968	chr19	-	2762643	2762694	UCCUGGAGCUGGGCAGAUGGGAACAGUCCAUCCCCGGUGCUCUCCUCCAGCC	52	0.153846	0.365385	0.192308	0.288462	-23.6	..((((((..(((((...((((........))))...)))))..))))))..	ENSG00000104969	protein_coding	no	no	no	novel-mir-candidate-162-5p	2762675	2762694	UCCUGGAGCUGGGCAGAUGG	20	0.15	0.2	0.2	0.45	-2.4	novel-mir-candidate-162-3p	2762643	2762665	AUCCCCGGUGCUCUCCUCCAGCC	23	0.0869565	0.521739	0.217391	0.173913	-0.9
novel-mir-candidate-309	1.3971	chr19	+	48478213	48478275	UGAGGGAGGUGGGGUGGGGUGAGGACUUGGAAGUCUGAGUUCUGUCCACCUUGCUUCUUCAGG	63	0.142857	0.15873	0.285714	0.412698	-30.5	(((((.((((((((((((...(((((((((....))))))))).)))))))))))))))))..	ENSG00000105443	protein_coding	yes	no	no	novel-mir-candidate-309-5p	48478213	48478236	UGAGGGAGGUGGGGUGGGGUGAGG	24	0.125	0	0.166667	0.708333	0	novel-mir-candidate-309-3p	48478250	48478275	AGUUCUGUCCACCUUGCUUCUUCAGG	26	0.115385	0.307692	0.384615	0.192308	-0.4
novel-mir-candidate-440	1.399	chr12	+	131132712	131132794	AGCCAGACCCUGUAGAGGGGGAUUCACUCAUAUGACCGUGUGACUGUUCAGUUAGCACCCCCAAACCACAGGGCUGAAAGCUG	83	0.26506	0.277108	0.192771	0.26506	-26.2	((((((.((((((...(((((...((.((((((....)))))).))...........))))).....)))))))))...))).	ENSG00000111452	protein_coding	yes	no	no	novel-mir-candidate-440-5p	131132712	131132731	AGCCAGACCCUGUAGAGGGG	20	0.25	0.25	0.1	0.4	-6.2	novel-mir-candidate-440-3p	131132777	131132794	CCACAGGGCUGAAAGCUG	18	0.277778	0.277778	0.111111	0.333333	-2	ggo-miR-140_MIMAT0024081
novel-mir-candidate-369	1.4023	chr2	+	84882529	84882587	GUGUGGCCACAGAGAAGCCCGCCCAGCUUCUCUCUGAGCUGGGCUUCUCUCUGGCCACA	59	0.152542	0.355932	0.220339	0.271186	-38.7	.((((((((.((((((((((((.(((.......))).)).)))))))))).))))))))	ENSG00000186854	protein_coding	yes	no	no	novel-mir-candidate-369-5p	84882529	84882552	GUGUGGCCACAGAGAAGCCCGCCC	24	0.208333	0.375	0.0833333	0.333333	-5.5	novel-mir-candidate-369-3p	84882565	84882587	AGCUGGGCUUCUCUCUGGCCACA	23	0.130435	0.347826	0.26087	0.26087	-5.1
novel-mir-candidate-385	1.4094	chr19	+	12952629	12952689	CUGGGGAGAGGAGGGGACCAGGGCUGUGAAUUACCUUCCCUUCCCCACCCUCUCCUGCAGC	61	0.163934	0.344262	0.196721	0.295082	-29.6	(((((((((((.(((((..((((..(((...)))...)))))))))..)))))))).))).	ENSG00000179262	protein_coding	yes	no	no	novel-mir-candidate-385-5p	12952629	12952651	CUGGGGAGAGGAGGGGACCAGGG	23	0.217391	0.130435	0.0434783	0.608696	-4.5	novel-mir-candidate-385-3p	12952667	12952689	CCUUCCCCACCCUCUCCUGCAGC	23	0.0869565	0.608696	0.217391	0.0869565	0
novel-mir-candidate-258	1.4108	chr22	+	50424358	50424435	UCCGUCCGCGUGUGGAAGGUCCGUCCGCGUGUGGAAGGUCCGUCAGUGUGUGGAAGGUCCGUCCGCGUGUGGAAGGUC	78	0.115385	0.24359	0.230769	0.410256	-37.1	.((.((((((((((((.((.((.((((((((((((...)))).))...)))))).)).)).)))))))))))).))..	ENSG00000100239	protein_coding	yes	no	no	novel-mir-candidate-258-5p	50424358	50424379	UCCGUCCGCGUGUGGAAGGUCC	22	0.0909091	0.318182	0.227273	0.363636	-4.6	novel-mir-candidate-258-3p	50424414	50424435	GUCCGUCCGCGUGUGGAAGGUC	22	0.0909091	0.272727	0.227273	0.409091	-4.6
novel-mir-candidate-254	1.4143	chr11	-	64078257	64078323	CAGGCAGGGGUCCAGGCUGGAGAAGAGGCCAGGGCAGGGGUCUCAUGCCUGGGACCUGUGCUGAGAG	67	0.19403	0.223881	0.134328	0.447761	-32.8	..((((.((((((((((..((((....((....)).....))))..)))).)))))).)))).....	ENSG00000133315, ENSG00000256824	protein_coding, antisense	yes	no	no	novel-mir-candidate-254-5p	64078306	64078323	CAGGCAGGGGUCCAGGCU	18	0.166667	0.277778	0.111111	0.444444	-2.1	novel-mir-candidate-254-3p	64078257	64078275	CUGGGACCUGUGCUGAGAG	19	0.157895	0.210526	0.210526	0.421053	-1.3
novel-mir-candidate-181	1.4167	chr16	+	67647791	67647846	AGGGGAGGGGGGUGGGGGUCUGUCCAACUGCUGAGUGACCCCGACCCACCACCAGG	56	0.178571	0.285714	0.125	0.410714	-28.4	..((..((.((((.((((((..((........))..)))))).)))).)).))...	ENSG00000159753	protein_coding	no	no	no	novel-mir-candidate-181-5p	67647791	67647812	AGGGGAGGGGGGUGGGGGUCUG	22	0.0909091	0.0454545	0.136364	0.727273	0	novel-mir-candidate-181-3p	67647828	67647846	ACCCCGACCCACCACCAGG	19	0.263158	0.578947	0	0.157895	0
novel-mir-candidate-382	1.4202	chr15	-	31266153	31266209	CCCCAGGCUCUGAACCAGCAGCCCCUCUGACAGCUGGGCCAGACUAAGCUGGGGCCC	57	0.192982	0.403509	0.122807	0.280702	-23.9	((((((..((((..(((((.............)))))..)))).....))))))...			no	no	yes	novel-mir-candidate-382-5p	31266187	31266209	CCCCAGGCUCUGAACCAGCAGCC	23	0.217391	0.478261	0.0869565	0.217391	-6.4	novel-mir-candidate-382-3p	31266153	31266172	GCCAGACUAAGCUGGGGCCC	20	0.2	0.35	0.1	0.35	-4.8
novel-mir-candidate-118	1.4202	chr6	-	158493846	158493920	CAGAACUGGCUGAGGGGCACAGGUGGAGAAGCCAGAGCUCCACCUGAGGGCUACUCCUGAGGUAGUAGGUGGUGU	75	0.226667	0.213333	0.173333	0.386667	-29.4	....((((.((.((((((.(((((((((.........)))))))))...)))...))).)).)))).........	ENSG00000130338	protein_coding	yes	no	no	novel-mir-candidate-118-5p	158493902	158493920	CAGAACUGGCUGAGGGGCA	19	0.263158	0.210526	0.105263	0.421053	-2.4	novel-mir-candidate-118-3p	158493846	158493864	CUGAGGUAGUAGGUGGUGU	19	0.157895	0.0526316	0.315789	0.473684	0
novel-mir-candidate-266	1.4221	chr22	+	35426060	35426122	GCCAGUCAGGUGGGGGAGACUGACCCUGGGGUAGGUUCCCAGGGGUAGGUGGCCUGACUGGCA	63	0.15873	0.222222	0.174603	0.444444	-39.1	(((((((((((........((..((((((((.....))))))))..))...))))))))))).			no	no	yes	novel-mir-candidate-266-5p	35426060	35426078	GCCAGUCAGGUGGGGGAGA	19	0.210526	0.157895	0.105263	0.526316	-2.5	novel-mir-candidate-266-3p	35426099	35426122	CAGGGGUAGGUGGCCUGACUGGCA	24	0.166667	0.208333	0.166667	0.458333	-5
novel-mir-candidate-377	1.4247	chr19	-	336258	336330	UCCUAGUGCCCCCCAGCCCUCAGAGGCGGAGACAAAGCCCCUUCCCUGGUCACUGGGGACUGGGCUCUGACCA	73	0.178082	0.383562	0.164384	0.273973	-25.1	.((((((...((((((.((...((((.((........))))))....))...)))))))))))).........	ENSG00000105556	protein_coding	yes	no	no	novel-mir-candidate-377-5p	336311	336330	UCCUAGUGCCCCCCAGCCCU	20	0.1	0.55	0.2	0.15	-0.2	novel-mir-candidate-377-3p	336258	336279	ACUGGGGACUGGGCUCUGACCA	22	0.181818	0.272727	0.181818	0.363636	-1.9	ppy-miR-612_MIMAT0016053
novel-mir-candidate-278	1.4294	chr17	-	78797770	78797827	GAGCUCUCUGUGUGGGCUCUGCUGCGCUGGGAGCCUGUCACGGUAGGAGCUCUCCCGG	58	0.0862069	0.293103	0.241379	0.37931	-28.7	((((((((((((((((((((.........)))))))).)))))..)))))))......	ENSG00000055483	protein_coding	yes	yes	no	novel-mir-candidate-278-5p	78797807	78797827	GAGCUCUCUGUGUGGGCUCUG	21	0.047619	0.238095	0.333333	0.380952	-8.8	novel-mir-candidate-278-3p	78797770	78797793	CUGUCACGGUAGGAGCUCUCCCGG	24	0.125	0.333333	0.208333	0.333333	-4
novel-mir-candidate-364	1.4324	chr10	+	80486624	80486703	CUUAGUUCCUGAGGCCCAGCUCCCUGGAGGGCACAGCCUUCUACUUUCCAGGCUCCUCUGGGAACCACGAGGAAGAGAGG	80	0.2	0.3125	0.2	0.2875	-28.9	(((..(((((..(((((((...((((((((((...)))).......)))))).....)))))..))...)))))..))).	ENSG00000108219	protein_coding	yes	no	no	novel-mir-candidate-364-5p	80486624	80486642	CUUAGUUCCUGAGGCCCAG	19	0.157895	0.315789	0.263158	0.263158	-2.4	novel-mir-candidate-364-3p	80486686	80486703	AACCACGAGGAAGAGAGG	18	0.444444	0.166667	0	0.388889	-0.3
novel-mir-candidate-212	1.436	chr16	-	72055502	72055549	AGCAGGACGGUGGCCAUGGGCAUUGACCCACAGGUGCCGUCUGCCAGU	48	0.1875	0.291667	0.166667	0.354167	-20.7	.((((.((((((.((.((((......))))..))))))))))))....	ENSG00000140830, ENSG00000257017	protein_coding, protein_coding	yes	no	no	novel-mir-candidate-212-5p	72055532	72055549	AGCAGGACGGUGGCCAUG	18	0.222222	0.222222	0.111111	0.444444	-0.1	novel-mir-candidate-212-3p	72055502	72055520	ACAGGUGCCGUCUGCCAGU	19	0.157895	0.315789	0.210526	0.315789	-1.6	ptr-miR-1286_MIMAT0008005
novel-mir-candidate-281	1.4404	chr1	-	246795404	246795465	GCACACCUGCUGGAGAGGGCCCAGGUGAGCUUCACCUCCGCCACCUGCGGAGGCUGAGCCCA	62	0.177419	0.370968	0.129032	0.322581	-27.6	((.((((((..((......)))))))).))(((((((((((.....))))))).))))....	ENSG00000223519	unitary_pseudogene	no	no	no	novel-mir-candidate-281-5p	246795446	246795465	GCACACCUGCUGGAGAGGGC	20	0.2	0.3	0.1	0.4	-2.5	novel-mir-candidate-281-3p	246795404	246795423	ACCUGCGGAGGCUGAGCCCA	20	0.2	0.35	0.1	0.35	-2.4
novel-mir-candidate-48	1.443	chr12	+	1805175	1805234	CGAGGACCCCCCCUGCCUGGCCUUCGAGUCUGGAGGGAGGCCAGGAGGAGGAGGUCCUGU	60	0.15	0.3	0.15	0.4	-38.8	..((((((((.(((.((((((((((..........))))))))))))).)).))))))..	ENSG00000151062	protein_coding	yes	no	no	novel-mir-candidate-48-5p	1805175	1805197	CGAGGACCCCCCCUGCCUGGCCU	23	0.0869565	0.521739	0.130435	0.26087	-2.5	novel-mir-candidate-48-3p	1805213	1805234	GGCCAGGAGGAGGAGGUCCUGU	22	0.181818	0.181818	0.136364	0.5	-6.5
novel-mir-candidate-425	1.445	chr3	+	180679953	180680021	UGUUCUGAUCGUCGCCUGUUUCAGUCGGCCAGCCUUCCUCACCGCACUCACCGGCCCCAUCGCGGAUGU	69	0.115942	0.391304	0.26087	0.231884	-12.8	.((((((((....(((.((...((((((..((.....))..))).))).)).)))...)))).))))..	ENSG00000145075	protein_coding	yes	no	no	novel-mir-candidate-425-5p	180679953	180679973	UGUUCUGAUCGUCGCCUGUUU	21	0.047619	0.238095	0.47619	0.238095	0	novel-mir-candidate-425-3p	180680001	180680021	CACCGGCCCCAUCGCGGAUGU	21	0.142857	0.428571	0.142857	0.285714	-2.6
novel-mir-candidate-200	1.4454	chr11	+	44618983	44619043	GGUGAGGCUGGGGCGUCUGAGGCCGGGACACCCAGCCUCCCUCUGACUCUCCGCCUCUCCC	61	0.0983607	0.409836	0.180328	0.311475	-33	((.(((((.((((.(((.(((((.(((...))).))))).....))).))))))))).)).	ENSG00000085117	protein_coding	yes	no	no	novel-mir-candidate-200-5p	44618983	44619003	GGUGAGGCUGGGGCGUCUGAG	21	0.0952381	0.142857	0.190476	0.571429	-3.8	novel-mir-candidate-200-3p	44619022	44619043	CCUCUGACUCUCCGCCUCUCCC	22	0.0454545	0.590909	0.272727	0.0909091	0	ptr-miR-345_MIMAT0008111
novel-mir-candidate-331	1.4486	chr15	-	81000666	81000727	GCCGAGAGACUGGGGGAGCGGACAGGGGAAGGCCUGCUCCGGCCCGGGGGCUCUGCGCACAC	62	0.16129	0.306452	0.0806452	0.451613	-28.5	((..((((.((.(((...((((((((......)))).)))).))).))..))))..))....			no	no	yes	novel-mir-candidate-331-5p	81000708	81000727	GCCGAGAGACUGGGGGAGCG	20	0.2	0.2	0.05	0.55	-2.8	novel-mir-candidate-331-3p	81000666	81000688	CGGCCCGGGGGCUCUGCGCACAC	23	0.0869565	0.434783	0.0869565	0.391304	-4.3	ppy-miR-1538_MIMAT0016235
novel-mir-candidate-149	1.4498	chr7	+	740642	740695	CCCGGCCACGCGCCUCUGUCUUGGGGAUGGCAUCUAGGCGGUGGUAGGUGGCCC	54	0.0925926	0.314815	0.203704	0.388889	-26.2	...((((((..(((.((((((.(((.......))))))))).)))..)))))).	ENSG00000164818	protein_coding	yes	no	no	novel-mir-candidate-149-5p	740642	740664	CCCGGCCACGCGCCUCUGUCUUG	23	0.0434783	0.478261	0.217391	0.26087	-3.5	novel-mir-candidate-149-3p	740675	740695	CUAGGCGGUGGUAGGUGGCCC	21	0.0952381	0.238095	0.190476	0.47619	-3.5
novel-mir-candidate-419	1.4507	chr5	+	176535820	176535869	CCCGUCCACAUCUCCAUGCUGUCCUAUCACGGAGCUCUGUGUGAACGGGU	50	0.16	0.34	0.26	0.24	-17.1	(((((.(((((((((.((.........)).))))....))))).))))).	ENSG00000146083	protein_coding	yes	no	no	novel-mir-candidate-419-5p	176535820	176535843	CCCGUCCACAUCUCCAUGCUGUCC	24	0.125	0.5	0.25	0.125	0	novel-mir-candidate-419-3p	176535850	176535869	GGAGCUCUGUGUGAACGGGU	20	0.15	0.15	0.25	0.45	-3.4
novel-mir-candidate-285	1.4522	chr17	+	77489977	77490033	CGAGGGCGGGCGGGCGGUCUGUGGCACUUCUGCCACUCCCCAGCACUGACCCUUUGG	57	0.105263	0.350877	0.192982	0.350877	-27.1	.((((((((((.((.((...((((((....)))))).)))).)).))).)))))...	ENSG00000184640	protein_coding	yes	no	no	novel-mir-candidate-285-5p	77489977	77489995	CGAGGGCGGGCGGGCGGUC	19	0.0526316	0.263158	0.0526316	0.631579	-2.3	novel-mir-candidate-285-3p	77490013	77490033	UCCCCAGCACUGACCCUUUGG	21	0.142857	0.428571	0.238095	0.190476	0
novel-mir-candidate-308	1.4548	chr18	+	77209984	77210047	CUUCGGCUACACUCAGCUUCCUUGGGCCCUGCUGACCCCAGGGAGGCUGUGGGGAAGCCGGUGC	64	0.125	0.328125	0.203125	0.34375	-32.5	..((((((...(((((((((((((((..........))))))))))))).))...))))))...	ENSG00000265844	lincRNA	yes	no	no	novel-mir-candidate-308-5p	77209984	77210005	CUUCGGCUACACUCAGCUUCCU	22	0.136364	0.409091	0.318182	0.136364	-2.6	novel-mir-candidate-308-3p	77210025	77210047	GGAGGCUGUGGGGAAGCCGGUGC	23	0.130435	0.173913	0.130435	0.565217	-5.7
novel-mir-candidate-319	1.455	chr3	+	139184566	139184635	GGAGCUGAGAGCCUUGCCCUUUCAGGUGCUUAGCUGAGGUGCUGCUCAGACAGGGAGGCCUUCAGGUGAG	70	0.171429	0.228571	0.228571	0.371429	-25.4	....(((((((.......)))))))...((((.((((((.(((.(((.....))).))))))))).))))	ENSG00000175110	protein_coding	yes	no	no	novel-mir-candidate-319-5p	139184566	139184585	GGAGCUGAGAGCCUUGCCCU	20	0.15	0.3	0.2	0.35	-3	novel-mir-candidate-319-3p	139184618	139184635	GGGAGGCCUUCAGGUGAG	18	0.166667	0.166667	0.166667	0.5	-1.5
novel-mir-candidate-164	1.4592	chr7	-	153853028	153853111	CUCUUUUCCUUUUGUGCCUAGGCUGAAACAACAGAGCUGUAUCUCUUUUAAGUAAAAUUAGCCUGGGUGUUAUGCAGAGAGAUG	84	0.25	0.178571	0.345238	0.22619	-21.8	((((((.........(((((((((((....((((((......)))).....))....))))))))))).......))))))...			no	no	yes	novel-mir-candidate-164-5p	153853093	153853111	CUCUUUUCCUUUUGUGCCU	19	0	0.315789	0.578947	0.105263	0	novel-mir-candidate-164-3p	153853028	153853048	UGGGUGUUAUGCAGAGAGAUG	21	0.238095	0.047619	0.285714	0.428571	0
novel-mir-candidate-207	1.4625	chr17	+	33228834	33228904	CUUCCAGGAGGAAACAAGGACACAAAGGUGGCACACCUGCCUCCCAAGUUCCUCCCUGUCCUCCAGGAGCU	71	0.253521	0.352113	0.169014	0.225352	-27.4	.((((.((((((....((((.((...((.((((....)))).))...)))))).....)))))).))))..	ENSG00000108684	protein_coding	yes	no	no	novel-mir-candidate-207-5p	33228834	33228853	CUUCCAGGAGGAAACAAGGA	20	0.4	0.2	0.1	0.3	-3	novel-mir-candidate-207-3p	33228886	33228904	UCCCUGUCCUCCAGGAGCU	19	0.105263	0.421053	0.263158	0.210526	-4.3	ppy-miR-339-5p_MIMAT0015842
novel-mir-candidate-381	1.4656	chr17	+	35433216	35433272	CCACACUUCCCCAGCGUGGCCUGCAUUUCUAUUGGGCAGCUGGCGCUCCGGAAGUGU	57	0.140351	0.333333	0.245614	0.280702	-23.9	..((((((((..(((((...((((...........))))...)))))..))))))))	ENSG00000172123	protein_coding	no	yes	no	novel-mir-candidate-381-5p	35433216	35433239	CCACACUUCCCCAGCGUGGCCUGC	24	0.125	0.5	0.166667	0.208333	-4.9	novel-mir-candidate-381-3p	35433252	35433272	CAGCUGGCGCUCCGGAAGUGU	21	0.142857	0.285714	0.190476	0.380952	-3
novel-mir-candidate-40	1.4691	chr10	+	1049255	1049312	GUGCGAGCCCGAGGCGCUGCGAACGGUGCCUAACGUCAGACGUCUCGAGGCUCGCGUU	58	0.155172	0.310345	0.172414	0.362069	-33	..(((((((((((((((((...(((........)))))).))))))).)))))))...			no	no	yes	novel-mir-candidate-40-5p	1049255	1049278	GUGCGAGCCCGAGGCGCUGCGAAC	24	0.166667	0.333333	0.0833333	0.416667	-5.9	novel-mir-candidate-40-3p	1049289	1049312	GUCAGACGUCUCGAGGCUCGCGUU	24	0.125	0.291667	0.25	0.333333	-1.8
novel-mir-candidate-338	1.4701	chr1	-	11794089	11794156	GGGCCGUGAGAGGGACUCAGGGUGCCAAACCUGAUGGUCGCCCCAGCCAGCUCACCGUCUCUCCCAGG	68	0.176471	0.352941	0.147059	0.323529	-26.5	((((.(((((..((.((..((((((((.......))).))))).))))..))))).))))........	ENSG00000177000	protein_coding	no	no	no	novel-mir-candidate-338-5p	11794138	11794156	GGGCCGUGAGAGGGACUCA	19	0.210526	0.210526	0.105263	0.473684	-4.6	novel-mir-candidate-338-3p	11794089	11794110	CCAGCUCACCGUCUCUCCCAGG	22	0.136364	0.5	0.181818	0.181818	0
novel-mir-candidate-325	1.4781	chr15	-	63487450	63487520	GGGACUCCGGUCUCUCCCCAGCUCGCCCCCUAGGGGACACAGGUGGUGCUGCGUGAGUCCGGGCUCCCAGU	71	0.112676	0.366197	0.183099	0.338028	-34.1	((((.(((((.(((....((((((((((((...))).....))))).))))...))).))))).))))...			no	no	yes	novel-mir-candidate-325-5p	63487498	63487520	GGGACUCCGGUCUCUCCCCAGCU	23	0.0869565	0.434783	0.217391	0.26087	-6.7	novel-mir-candidate-325-3p	63487450	63487471	UGCGUGAGUCCGGGCUCCCAGU	22	0.0909091	0.318182	0.227273	0.363636	-3.3
novel-mir-candidate-36	1.4795	chr19	+	47002884	47002941	GAGUGUGGAGGGGGUGGUGAGGAGGAGCACCUGGGCUCUCUACCCCUCUCCUCACAGA	58	0.172414	0.258621	0.189655	0.37931	-30.9	..(((.(((((((((((.(((.(((....)))...))).))))))).)))).)))...	ENSG00000160007	protein_coding	no	yes	no	novel-mir-candidate-36-5p	47002884	47002906	GAGUGUGGAGGGGGUGGUGAGGA	23	0.173913	0	0.173913	0.652174	0	novel-mir-candidate-36-3p	47002918	47002941	GCUCUCUACCCCUCUCCUCACAGA	24	0.166667	0.5	0.25	0.0833333	0
novel-mir-candidate-197	1.4796	chr22	-	32348137	32348204	AGUCCUGGGGUGGGGCCCUGGAGGUGUCCUGGAAAAAACGGGACACCUCCCUGUCCUCCAGGAGCUCA	68	0.191176	0.294118	0.176471	0.338235	-39.9	..((((((...(((((...((((((((((((.......))))))))))))..))))))))))).....			no	no	yes	novel-mir-candidate-197-5p	32348180	32348204	AGUCCUGGGGUGGGGCCCUGGAGGU	25	0.08	0.2	0.2	0.52	-9	novel-mir-candidate-197-3p	32348137	32348157	UCCCUGUCCUCCAGGAGCUCA	21	0.142857	0.428571	0.238095	0.190476	-4.3	ppy-miR-339-5p_MIMAT0015842
novel-mir-candidate-106	1.482	chr11	+	46378933	46378991	CUCAGGGAAGGAGGGGUGGCCCCAGGAGGUCCAGCCCUGCCAUGCCUCCUGCCCUCAGC	59	0.152542	0.372881	0.135593	0.338983	-30.3	((.((((.((((((.(((((....((.(((...)))))))))).)))))).)))).)).	ENSG00000149091	protein_coding	no	no	no	novel-mir-candidate-106-5p	46378933	46378955	CUCAGGGAAGGAGGGGUGGCCCC	23	0.173913	0.26087	0.0869565	0.478261	-4.7	novel-mir-candidate-106-3p	46378966	46378991	GCCCUGCCAUGCCUCCUGCCCUCAGC	26	0.0769231	0.538462	0.192308	0.192308	-0.7
novel-mir-candidate-416	1.4866	chr17	-	72641665	72641722	UUGCCAGUGUCUUUUUUUAAGCUGUGUGGCAUGGCUUAACAGGACUGCCUGGCCGGCG	58	0.137931	0.224138	0.327586	0.310345	-21.5	..(((((.(((((...((((((((((...)))))))))).)))))...))))).....			no	no	yes	novel-mir-candidate-416-5p	72641706	72641722	UUGCCAGUGUCUUUUUU	17	0.0588235	0.176471	0.588235	0.176471	0	novel-mir-candidate-416-3p	72641665	72641683	CAGGACUGCCUGGCCGGCG	19	0.105263	0.368421	0.105263	0.421053	-4.5
novel-mir-candidate-210	1.499	chr2	-	27093888	27093958	UCCAGGAGGCCCAGCCUGGAAGUGGUGCUGCCUUGGUGAGCCAGCUCACUGCUUUGUCCUCCUGCAGCCAG	71	0.140845	0.323944	0.225352	0.309859	-24.4	..(((((((...(((.....(((((.((((.(((...))).))))))))))))....))))))).......	ENSG00000138030	protein_coding	yes	no	no	novel-mir-candidate-210-5p	27093939	27093958	UCCAGGAGGCCCAGCCUGGA	20	0.2	0.35	0.1	0.35	-8.5	novel-mir-candidate-210-3p	27093888	27093906	UUUGUCCUCCUGCAGCCAG	19	0.105263	0.368421	0.315789	0.210526	0	ptr-miR-665_MIMAT0008312
novel-mir-candidate-264	1.4991	chr19	-	40670019	40670074	GCUGCGGCAGGGUCUGGGCCUGUUUGCUGACCUCUGUCCUGCCCUGCUUCCCAGUG	56	0.0535714	0.339286	0.285714	0.321429	-23.4	((((.((((((((..((((..(((....)))....)))).))))))))...)))).	ENSG00000105245	protein_coding	no	no	no	novel-mir-candidate-264-5p	40670056	40670074	GCUGCGGCAGGGUCUGGGC	19	0.0526316	0.263158	0.157895	0.526316	-3.3	novel-mir-candidate-264-3p	40670019	40670042	UCUGUCCUGCCCUGCUUCCCAGUG	24	0.0416667	0.416667	0.333333	0.208333	-1.2
novel-mir-candidate-271	1.5009	chr8	-	139738770	139738835	CCAGGACCAGCUCUGCGCCCAGGCUGGGUCUCCCCUAGUGGCCUGGGAAGUGGUGGCCCUGAGGCU	66	0.121212	0.333333	0.181818	0.363636	-30.3	.((((.(((...((((.(((((((((((....)))....))))))))..))))))).)))).....	ENSG00000167632	protein_coding	yes	no	no	novel-mir-candidate-271-5p	139738817	139738835	CCAGGACCAGCUCUGCGCC	19	0.157895	0.473684	0.105263	0.263158	-1.5	novel-mir-candidate-271-3p	139738770	139738793	CUGGGAAGUGGUGGCCCUGAGGCU	24	0.125	0.208333	0.208333	0.458333	-3.9
novel-mir-candidate-349	1.504	chr19	+	12896133	12896203	GGGUGGUGGGCAGGUGGUGAACAGGGGCAAAGGGGCACUGGUCAGACCCCUCACCGACUGUUCCAUCCCCA	71	0.197183	0.28169	0.15493	0.366197	-33.4	(((.(((((((((..(((((...((((......(((....)))...)))))))))..))).))))))))).	ENSG00000105607	protein_coding	yes	no	no	novel-mir-candidate-349-5p	12896133	12896155	GGGUGGUGGGCAGGUGGUGAACA	23	0.173913	0.0869565	0.173913	0.565217	-1.2	novel-mir-candidate-349-3p	12896178	12896203	ACCCCUCACCGACUGUUCCAUCCCCA	26	0.192308	0.538462	0.192308	0.0769231	0
novel-mir-candidate-20	1.5072	chr11	-	355886	355944	CAGCCAGUGUCUGGGGGCAGAGUGUCCAGGAAGCUGCGCCCCCGGGCUCGUGUCCUGCC	59	0.118644	0.338983	0.169492	0.372881	-25.1	(((.((..((((((((((..(((.((...)).)))..))))))))))...))..)))..			no	no	yes	novel-mir-candidate-20-5p	355926	355944	CAGCCAGUGUCUGGGGGCA	19	0.157895	0.263158	0.157895	0.421053	-3.5	novel-mir-candidate-20-3p	355886	355908	CGCCCCCGGGCUCGUGUCCUGCC	23	0	0.521739	0.173913	0.304348	-5.2
novel-mir-candidate-398	1.5073	chr22	-	50280118	50280192	GGCCACACCCAGGCUGGACAGGGGCGAGGCUGGCGCAAGGGUGGCCGGGUGCUUGGAGGAGUCAGUUGGGCCUCA	75	0.16	0.253333	0.133333	0.453333	-27.2	((((..((...((((...((((.((..(((..((......)).)))..)).))))....)))).))..))))...	ENSG00000196576	protein_coding	yes	no	no	novel-mir-candidate-398-5p	50280169	50280192	GGCCACACCCAGGCUGGACAGGGG	24	0.208333	0.333333	0.0416667	0.416667	-4.5	novel-mir-candidate-398-3p	50280118	50280140	UUGGAGGAGUCAGUUGGGCCUCA	23	0.173913	0.173913	0.26087	0.391304	-4.7
novel-mir-candidate-170	1.5098	chr19	+	51643447	51643497	AUUCCAGGUGGGGCUGAGCUGUCCUGGGGCAGGACAGCUCAGCCCCACCUG	51	0.156863	0.313726	0.176471	0.352941	-48.4	....((((((((((((((((((((((...))))))))))))))))))))))	ENSG00000105501, ENSG00000268500, ENSG00000254415	protein_coding, protein_coding, protein_coding	yes	no	no	novel-mir-candidate-170-5p	51643447	51643469	AUUCCAGGUGGGGCUGAGCUGUC	23	0.130435	0.217391	0.26087	0.391304	-2.5	novel-mir-candidate-170-3p	51643479	51643497	GACAGCUCAGCCCCACCUG	19	0.210526	0.473684	0.105263	0.210526	0
novel-mir-candidate-251	1.5123	chr21	+	44321967	44322021	AGGCUGAGACCUGGGUCCGCGUGUCGGUGCCCACCCGGGCCUGGGUACUCAGCUC	55	0.109091	0.345455	0.181818	0.363636	-34.7	.((((((((((((((((((.(((........))).))))))))))).))))))).	ENSG00000141959	protein_coding	yes	no	no	novel-mir-candidate-251-5p	44321967	44321989	AGGCUGAGACCUGGGUCCGCGUG	23	0.130435	0.26087	0.173913	0.434783	-2.7	novel-mir-candidate-251-3p	44321999	44322021	ACCCGGGCCUGGGUACUCAGCUC	23	0.130435	0.391304	0.173913	0.304348	-5.3
novel-mir-candidate-198	1.518	chr19	+	7441850	7441912	GGGAGGGAAUUGGGGUGGCAUGGCUCUGGGCCCCCAGCAGCCACACCUCGCUCUUCCCUCAGA	63	0.15873	0.333333	0.174603	0.333333	-33.9	..(((((((.(((((((...(((((((((....)))).))))))))))))...)))))))...	ENSG00000268861, ENSG00000104880	protein_coding, protein_coding	no	no	no	novel-mir-candidate-198-5p	7441850	7441873	GGGAGGGAAUUGGGGUGGCAUGGC	24	0.166667	0.0833333	0.166667	0.583333	0	novel-mir-candidate-198-3p	7441893	7441912	CACCUCGCUCUUCCCUCAGA	20	0.15	0.5	0.25	0.1	0	ppy-miR-1228_MIMAT0016164
novel-mir-candidate-259	1.5207	chr12	-	122996909	122996977	AGGGGAGAGGGGCCCUUUGGGCUGAGCUGGAGCCGCCUGCCCUCUCUUGACUGGCCCCUCUCCCCAGCC	69	0.101449	0.376812	0.188406	0.333333	-38.2	.(((((((((((((..(((((..((((.((.....)).))..)).)))))..)))))))))))))....	ENSG00000090975	protein_coding	no	no	no	novel-mir-candidate-259-5p	122996955	122996977	AGGGGAGAGGGGCCCUUUGGGCU	23	0.130435	0.173913	0.173913	0.521739	-6.6	novel-mir-candidate-259-3p	122996909	122996931	UUGACUGGCCCCUCUCCCCAGCC	23	0.0869565	0.521739	0.217391	0.173913	-2.9
novel-mir-candidate-130	1.5212	chr20	-	53593101	53593160	CGCGCCCCGUGACUCCCUCGGGUGCCCAAAAAUCUGUCCCCGGGAGUCUUGGGGCGCCUG	60	0.116667	0.383333	0.183333	0.316667	-35.6	.((((((((.(((((((..(((.((..........)).)))))))))).))))))))...	ENSG00000171940	protein_coding	yes	no	no	novel-mir-candidate-130-5p	53593140	53593160	CGCGCCCCGUGACUCCCUCGG	21	0.047619	0.52381	0.142857	0.285714	-2	novel-mir-candidate-130-3p	53593101	53593121	CCGGGAGUCUUGGGGCGCCUG	21	0.047619	0.285714	0.190476	0.47619	-6.6
novel-mir-candidate-435	1.5238	chr19	-	8586720	8586799	GAGGGGAUGAGGAUUAGGGGUCAGUGGGGAGGGCGGUUUCAGCAUGACUAGAAUUCUGAACCCUGCAUCGUCCCCCAGCC	80	0.2125	0.225	0.2	0.3625	-27.3	..((((((((....(((((.((((..((....((.......))....))......)))).)))))..)))))))).....	ENSG00000142303	protein_coding	no	no	no	novel-mir-candidate-435-5p	8586773	8586799	GAGGGGAUGAGGAUUAGGGGUCAGUGG	27	0.222222	0.037037	0.185185	0.555556	0	novel-mir-candidate-435-3p	8586720	8586744	CUGAACCCUGCAUCGUCCCCCAGCC	25	0.16	0.52	0.16	0.16	0
novel-mir-candidate-250	1.5245	chrX	-	135032224	135032271	GCGGGGCCACGAGCGGGGCUCCAACCCUCUCAUGGACUCCGCCCACAA	48	0.1875	0.416667	0.104167	0.291667	-24.9	(((((((((.(((.(((.......))).))).))).))))))......			no	no	yes	novel-mir-candidate-250-5p	135032253	135032271	GCGGGGCCACGAGCGGGGC	19	0.105263	0.315789	0	0.578947	-2.6	novel-mir-candidate-250-3p	135032224	135032244	UCUCAUGGACUCCGCCCACAA	21	0.238095	0.428571	0.190476	0.142857	-1
novel-mir-candidate-4	1.5263	chr12	-	108787825	108787868	AACUUUUCCCCUACUCUUGCCAUAGAGAGGAGGAGAAGAAACUA	44	0.340909	0.227273	0.227273	0.204545	-17.3	..((((((((((.((((......))))))).)))))))......	ENSG00000084112	protein_coding	no	yes	no	novel-mir-candidate-4-5p	108787847	108787868	AACUUUUCCCCUACUCUUGCCA	22	0.181818	0.409091	0.363636	0.0454545	0	novel-mir-candidate-4-3p	108787825	108787843	AGAGGAGGAGAAGAAACUA	19	0.526316	0.0526316	0.0526316	0.368421	0
novel-mir-candidate-29	1.5281	chr6	-	166955766	166955841	GUGCGAUGAGGGGAGUCCUGAGCACGCCCCGGGGUGACCUCUGGGAAGGAGUGGGUUGGGGGGAGCCCUGGGCACG	76	0.144737	0.223684	0.144737	0.486842	-34.7	((((....((((...((((.(((.((((((((((....))))))).....))).))).))))...))))..)))).	ENSG00000249141, ENSG00000026297	protein_coding, protein_coding	yes	no	no	novel-mir-candidate-29-5p	166955821	166955841	GUGCGAUGAGGGGAGUCCUGA	21	0.190476	0.142857	0.190476	0.47619	-1.9	novel-mir-candidate-29-3p	166955766	166955790	UGGGUUGGGGGGAGCCCUGGGCACG	25	0.08	0.2	0.16	0.56	-8.4
novel-mir-candidate-39	1.532	chr19	+	2271734	2271782	CCUGUGGGGUGAGUCAGGGUUCUGAAUUGGGCUGCACCCCCUGGACAGG	49	0.142857	0.244898	0.22449	0.387755	-19.5	(((((((((((((((..((((...)))).)))).))))))....)))))	ENSG00000104904, ENSG00000273734	protein_coding, protein_coding	yes	no	no	novel-mir-candidate-39-5p	2271734	2271757	CCUGUGGGGUGAGUCAGGGUUCUG	24	0.0833333	0.166667	0.291667	0.458333	-3.9	novel-mir-candidate-39-3p	2271757	2271782	GAAUUGGGCUGCACCCCCUGGACAGG	26	0.192308	0.307692	0.153846	0.346154	-3.2
novel-mir-candidate-337	1.5332	chr19	-	12930527	12930602	GCGGGGUGAAUGGGGAGUGAGUGAUGGGAUGAAGGUGGCCCUCGUGCCCCACUCACUGCAGCCUCUCUUUUCCAGC	76	0.157895	0.263158	0.223684	0.355263	-29	((.(((.((..((((((((((((..(((((((.((....)))))).)))))))))))....))))..)).))).))	ENSG00000179115, ENSG00000266975	protein_coding, antisense	yes	no	no	novel-mir-candidate-337-5p	12930579	12930602	GCGGGGUGAAUGGGGAGUGAGUGA	24	0.208333	0.0416667	0.166667	0.583333	0	novel-mir-candidate-337-3p	12930527	12930551	CUCACUGCAGCCUCUCUUUUCCAGC	25	0.12	0.44	0.32	0.12	0
novel-mir-candidate-248	1.5341	chr11	+	76445364	76445428	GUAUCCGCUGGCUUACUCUCUCUCGGUUGUCCUCUCCGCUGGGGAGGGAGUGAGGCGCGGGUGCC	65	0.0769231	0.292308	0.261538	0.369231	-33.9	(((((((.((.((((((((((((((((..........))).))))))))))))).))))))))).	ENSG00000158636	protein_coding	yes	no	no	novel-mir-candidate-248-5p	76445364	76445384	GUAUCCGCUGGCUUACUCUCU	21	0.0952381	0.333333	0.380952	0.190476	-0.4	novel-mir-candidate-248-3p	76445409	76445428	GGGAGUGAGGCGCGGGUGCC	20	0.1	0.2	0.1	0.6	-3
novel-mir-candidate-280	1.535	chr19	+	855895	855956	CAGGCGGCGGGCAGGUGGGCAGGGCCUCGCAGUCCAGCUUCCCCACCUUGUCUGCCUCCACA	62	0.129032	0.387097	0.16129	0.322581	-32.1	..((.(((((((((((((((.((((......)))).))....))))).)))))))).))...	ENSG00000197561	protein_coding	yes	no	no	novel-mir-candidate-280-5p	855895	855918	CAGGCGGCGGGCAGGUGGGCAGGG	24	0.125	0.208333	0.0416667	0.625	-2.4	novel-mir-candidate-280-3p	855934	855956	UCCCCACCUUGUCUGCCUCCACA	23	0.130435	0.521739	0.26087	0.0869565	0
novel-mir-candidate-196	1.5375	chr17	+	73878006	73878061	CUCUCAGUAGAUCCCCUGCCCCUGUGCCCCAGGGGAGGAGAGGGACGGCCGGGGGU	56	0.142857	0.321429	0.142857	0.392857	-23.3	(((((.((...((((((.((((((.....))))))...)).))))..)).))))).			no	no	yes	novel-mir-candidate-196-5p	73878006	73878024	CUCUCAGUAGAUCCCCUGC	19	0.157895	0.421053	0.263158	0.157895	-1.6	novel-mir-candidate-196-3p	73878043	73878061	GAGAGGGACGGCCGGGGGU	19	0.157895	0.157895	0.0526316	0.631579	-1.2	ggo-miR-3126_MIMAT0024261
novel-mir-candidate-176	1.5377	chr19	+	44989376	44989435	CGCAGGCCUCACUUGGCACCAGUGCUGUGUGGCCUCCCUGGUCUAAGGAGAGGCUUGGGC	60	0.133333	0.3	0.216667	0.35	-27.4	..((((((((.(((((.(((((.(((....)))....))))))))))..))))))))...	ENSG00000104853	protein_coding	yes	no	no	novel-mir-candidate-176-5p	44989376	44989400	CGCAGGCCUCACUUGGCACCAGUGC	25	0.16	0.4	0.16	0.28	-5.3	novel-mir-candidate-176-3p	44989412	44989435	CCUGGUCUAAGGAGAGGCUUGGGC	24	0.166667	0.208333	0.208333	0.416667	-6.9
novel-mir-candidate-11	1.5429	chr6	-	41733552	41733610	UGGCUCCCUUCUCUCCGUCUGCCUCCUGGCCGCGGGGCCCGGAGAGCUGGGAGCCAGAG	59	0.0847458	0.372881	0.186441	0.355932	-38.2	((((((((..(((((((...(((((........))))).)))))))..))))))))...	ENSG00000112561, ENSG00000231102	protein_coding, antisense	yes	yes	no	novel-mir-candidate-11-5p	41733588	41733610	UGGCUCCCUUCUCUCCGUCUGCC	23	0	0.478261	0.347826	0.173913	-1.8	novel-mir-candidate-11-3p	41733552	41733574	GCCCGGAGAGCUGGGAGCCAGAG	23	0.217391	0.26087	0.0434783	0.478261	-7.1
novel-mir-candidate-34	1.5431	chr16	-	67936311	67936397	GUGAGCAGCGGGGAGGGACGGGGAGCUGGAGGGGAGCCGAGAGUAUCGAGCAGGCACUGAAGCUGCGGUCCCUCCCUCUCCUCAGGA	87	0.195402	0.252874	0.126437	0.425287	-37.9	.((((.((.((((((((((....((((..((....(((((.....))).)).....))..))))...)))))))))))).))))...	ENSG00000205220	protein_coding	no	no	no	novel-mir-candidate-34-5p	67936371	67936397	GUGAGCAGCGGGGAGGGACGGGGAGCU	27	0.185185	0.148148	0.0740741	0.592593	-2.6	novel-mir-candidate-34-3p	67936311	67936334	UGCGGUCCCUCCCUCUCCUCAGGA	24	0.0833333	0.458333	0.25	0.208333	-1.6
novel-mir-candidate-312	1.545	chr17	+	2399870	2399928	GCAGCGAGGGGGGCCCGGGGGCUGACCCCCAGCGACCCGCGGGCCAUUUCGCAAACGCC	59	0.152542	0.38983	0.0677966	0.38983	-31.3	...((((((..(((((((((((((.....))))..))).)))))).)))))).......	ENSG00000070444	protein_coding	yes	no	no	novel-mir-candidate-312-5p	2399870	2399888	GCAGCGAGGGGGGCCCGGG	19	0.105263	0.263158	0	0.631579	-3.2	novel-mir-candidate-312-3p	2399906	2399928	CCGCGGGCCAUUUCGCAAACGCC	23	0.173913	0.434783	0.130435	0.26087	-3.9
novel-mir-candidate-195	1.5479	chr11	+	65611173	65611223	CUUCUCCUUUCUGGGAGGCCUGGGCCAGGUCUCCCACUUGGGAGGGGGAGU	51	0.0980392	0.27451	0.254902	0.372549	-33.4	((((((((((((((((((((((...)))))))))))...))))))))))).	ENSG00000173327	protein_coding	yes	yes	no	novel-mir-candidate-195-5p	65611173	65611195	CUUCUCCUUUCUGGGAGGCCUGG	23	0.0434783	0.304348	0.347826	0.304348	-6.9	novel-mir-candidate-195-3p	65611204	65611223	UCCCACUUGGGAGGGGGAGU	20	0.15	0.2	0.2	0.45	-5.6	ptr-miR-532_MIMAT0008213
novel-mir-candidate-295	1.5495	chr2	-	96023225	96023276	UGGUAGGGAGGCGGUGGGGAGCUGCACUCACCCCGGCCUGUCCCCUCCAGCU	52	0.115385	0.346154	0.173077	0.365385	-23.7	(((.((((.((((((.(((............))).))).))))))))))...	ENSG00000231584, ENSG00000186281	transcribed_unprocessed_pseudogene, protein_coding	no	no	no	novel-mir-candidate-295-5p	96023255	96023276	UGGUAGGGAGGCGGUGGGGAGC	22	0.136364	0.0909091	0.136364	0.636364	-0.2	novel-mir-candidate-295-3p	96023225	96023247	ACCCCGGCCUGUCCCCUCCAGCU	23	0.0869565	0.565217	0.173913	0.173913	-0.7
novel-mir-candidate-394	1.5511	chr10	+	31551105	31551151	CCGCGGGUGCUUACUGACCCUUUUGGGUUGGAGUUAGCUCAAGCGGU	47	0.12766	0.234043	0.297872	0.340426	-19.9	((((....(((.((((((((....)))))..))).)))....)))).			no	no	yes	novel-mir-candidate-394-5p	31551105	31551125	CCGCGGGUGCUUACUGACCCU	21	0.0952381	0.380952	0.238095	0.285714	-6.2	novel-mir-candidate-394-3p	31551127	31551151	UUGGGUUGGAGUUAGCUCAAGCGGU	25	0.16	0.12	0.32	0.4	-5.9
novel-mir-candidate-352	1.5541	chr21	-	46323600	46323658	UGGAUCUCAGGGGAUCCGCAAGGGCUCCCUCACCCUUGCCGGGACCCUGGGAACCCGAA	59	0.186441	0.355932	0.152542	0.305085	-31.9	.((.((((((((..((((((((((........)))))).)))).)))))))).))....	ENSG00000160298	protein_coding	no	yes	no	novel-mir-candidate-352-5p	46323635	46323658	UGGAUCUCAGGGGAUCCGCAAGGG	24	0.208333	0.208333	0.166667	0.416667	-7.4	novel-mir-candidate-352-3p	46323600	46323623	UUGCCGGGACCCUGGGAACCCGAA	24	0.208333	0.333333	0.125	0.333333	-6.1
novel-mir-candidate-52	1.5602	chr12	+	110468755	110468811	CCCCGCUCUCCCGAAGCUGUUCGGGCAGUGUCCGAACGGCUUCGGAGGGGCGAGAAG	57	0.157895	0.315789	0.157895	0.368421	-39.6	...((((((.((((((((((((((((...)))))))))))))))).)))))).....	ENSG00000111231, ENSG00000204856	protein_coding, protein_coding	yes	yes	no	novel-mir-candidate-52-5p	110468755	110468777	CCCCGCUCUCCCGAAGCUGUUCG	23	0.0869565	0.478261	0.217391	0.217391	-1.5	novel-mir-candidate-52-3p	110468788	110468811	GAACGGCUUCGGAGGGGCGAGAAG	24	0.25	0.166667	0.0833333	0.5	-3.7
novel-mir-candidate-83	1.5669	chr2	-	106095631	106095691	UUCGGGCUCCCCUCGGGCAGAGGCGUGUAGUGUAGCCCUGUGUCCAGCAGGAGCCCGGCAC	61	0.131148	0.327869	0.180328	0.360656	-32.9	.(((((((((.((.(((((.(((.((........))))).)))))))..)))))))))...	ENSG00000115652	protein_coding	yes	no	no	novel-mir-candidate-83-5p	106095669	106095691	UUCGGGCUCCCCUCGGGCAGAGG	23	0.0869565	0.347826	0.173913	0.391304	-4.7	novel-mir-candidate-83-3p	106095631	106095654	CUGUGUCCAGCAGGAGCCCGGCAC	24	0.166667	0.375	0.125	0.333333	-6.2
novel-mir-candidate-143	1.5709	chr21	+	44441788	44441845	GCAGCCGCUGAGUUCGGGGCUCACUACUGACUGUGCCCUCAGGCUGGGCGGCUCCAGU	58	0.12069	0.327586	0.206897	0.344828	-27.9	..(((((((.((((.(((((.((........)).)))))..)))).))))))).....	ENSG00000142185	protein_coding	no	no	no	novel-mir-candidate-143-5p	44441788	44441807	GCAGCCGCUGAGUUCGGGGC	20	0.1	0.3	0.15	0.45	-5.8	novel-mir-candidate-143-3p	44441823	44441845	CCCUCAGGCUGGGCGGCUCCAGU	23	0.0869565	0.391304	0.173913	0.347826	-6
novel-mir-candidate-439	1.571	chr19	+	39416396	39416472	CGAGUGCUUCGUGCAGAGGGUGAGUGGAGGGGUGGGGGGCUCUCGGUCCUGGAUGGGGCCUUUGUAGAGGGGGGAGA	77	0.12987	0.142857	0.207792	0.519481	-24.4	......((((.((((((((........((((.((((.....)))).))))........)))))))))))).......	ENSG00000090924	protein_coding	no	no	no	novel-mir-candidate-439-5p	39416396	39416414	CGAGUGCUUCGUGCAGAGG	19	0.157895	0.210526	0.210526	0.421053	-2.2	novel-mir-candidate-439-3p	39416455	39416472	CUUUGUAGAGGGGGGAGA	18	0.222222	0.0555556	0.222222	0.5	-0.4	ptr-miR-520f_MIMAT0008202
novel-mir-candidate-123	1.5749	chr4	-	31722581	31722630	AGAAUUACUCAGAGACCUUUAUGUCUGUGGGUGUUUGGGUGUAUAUGUGU	50	0.2	0.1	0.4	0.3	-13.6	.....((((((((.((((..........)))).)))))))).........			no	no	yes	novel-mir-candidate-123-5p	31722612	31722630	AGAAUUACUCAGAGACCUU	19	0.368421	0.210526	0.263158	0.157895	0	novel-mir-candidate-123-3p	31722581	31722599	UGUUUGGGUGUAUAUGUGU	19	0.105263	0	0.526316	0.368421	0
novel-mir-candidate-396	1.5795	chr21	+	43346261	43346349	GUCACGUGCAGCUGAGCGGGGGCCUGUCCUUCCUGUCCUCCUGGAUGGAGGCCCUCCCUGCGGGUUCCUCUGCUCUUUCCUGCCCCACU	89	0.0674157	0.382022	0.269663	0.280899	-34.1	.......((((..((((((((((((((.(((((.((((....)))))))))........)))))..)))))))))....))))......			no	no	yes	novel-mir-candidate-396-5p	43346261	43346283	GUCACGUGCAGCUGAGCGGGGGC	23	0.130435	0.26087	0.130435	0.478261	-3.2	novel-mir-candidate-396-3p	43346327	43346349	CCUCUGCUCUUUCCUGCCCCACU	23	0.0434783	0.521739	0.347826	0.0869565	-0.8
novel-mir-candidate-365	1.5801	chr6	-	36196612	36196653	CCUCCCUGACUCUGCGGGCUCUCCCGCUGAACAGGAGCGAGA	42	0.166667	0.380952	0.166667	0.285714	-16.6	.(((((((..((.(((((....))))).)).))))...))).	ENSG00000246982	antisense	yes	no	no	novel-mir-candidate-365-5p	36196634	36196653	CCUCCCUGACUCUGCGGGCU	20	0.05	0.45	0.25	0.25	-3.4	novel-mir-candidate-365-3p	36196612	36196632	UCCCGCUGAACAGGAGCGAGA	21	0.285714	0.285714	0.0952381	0.333333	-5
novel-mir-candidate-111	1.5838	chr7	+	7969177	7969239	GGCGGGGGUGUGCGUUGGGGAGGGGGAGCCCCGAGACUCCUCCCCCACAGCGAUACCCCCGCC	63	0.126984	0.365079	0.111111	0.396825	-49	(((((((((((.((((((((.(((((((........)))))))))).))))))))))))))))	ENSG00000283549, ENSG00000233108, ENSG00000106415	processed_transcript, antisense, protein_coding	yes	yes	no	novel-mir-candidate-111-5p	7969177	7969199	GGCGGGGGUGUGCGUUGGGGAGG	23	0.0434783	0.0869565	0.173913	0.695652	-2.3	novel-mir-candidate-111-3p	7969217	7969239	UCCCCCACAGCGAUACCCCCGCC	23	0.173913	0.608696	0.0869565	0.130435	-2.3
novel-mir-candidate-446	1.5881	chr6	-	3654607	3654676	CACCCAGGGGCUCUGGCCAGAGGAGGUCACAGGAAGAUGCCUAGCGGCCCGUGGAGCGACCUGCCCCGCA	70	0.2	0.342857	0.1	0.357143	-24.5	...(((.(((((.(((((......))))).(((......)))...))))).))).(((........))).			no	no	yes	novel-mir-candidate-446-5p	3654654	3654676	CACCCAGGGGCUCUGGCCAGAGG	23	0.173913	0.347826	0.0869565	0.391304	-4.5	novel-mir-candidate-446-3p	3654607	3654625	UGGAGCGACCUGCCCCGCA	19	0.157895	0.421053	0.105263	0.315789	-3.7	ptr-miR-510_MIMAT0005775
novel-mir-candidate-218	1.5901	chr16	+	89176319	89176395	GCAGCCUCGGAGCCAGCAGGGGCGUGGUGGUCAGAGUAGCUGUCGACACCUGUGGUUUUGCAGGGGGAGGGGCGGCC	77	0.142857	0.233766	0.168831	0.454545	-29.6	((.(((((....((.((((((.((.((((..(((.....)))....))))..)).)))))).))....))))).)).	ENSG00000129910	protein_coding	yes	no	no	novel-mir-candidate-218-5p	89176319	89176339	GCAGCCUCGGAGCCAGCAGGG	21	0.190476	0.333333	0.047619	0.428571	-1.8	novel-mir-candidate-218-3p	89176376	89176395	UUGCAGGGGGAGGGGCGGCC	20	0.1	0.2	0.1	0.6	-0.2
novel-mir-candidate-283	1.5947	chr15	-	56365284	56365338	UGCUGCGAGCGGCGCGAGCCUCUGGCAGCGGGCUCGGCCUUUGCUCGCAGCACUC	55	0.0909091	0.363636	0.181818	0.363636	-36.7	(((((((((((((.(((((((........))))))))))...))))))))))...	ENSG00000151575	protein_coding	yes	no	no	novel-mir-candidate-283-5p	56365318	56365338	UGCUGCGAGCGGCGCGAGCCU	21	0.0952381	0.333333	0.142857	0.428571	-6	novel-mir-candidate-283-3p	56365284	56365306	CUCGGCCUUUGCUCGCAGCACUC	23	0.0869565	0.434783	0.26087	0.217391	-1.9
novel-mir-candidate-282	1.5985	chr8	-	144099206	144099265	AUGGGGGUGGGGUGUGGGAGGUGGGGUGCAGCCCCACAGUCCUGAGCUCCACCCCCUCAG	60	0.133333	0.283333	0.166667	0.416667	-43.4	..(((((((((((..((((.(((((((...)))))))..))))..)))))))))))....	ENSG00000179526	protein_coding	yes	no	no	novel-mir-candidate-282-5p	144099242	144099265	AUGGGGGUGGGGUGUGGGAGGUGG	24	0.0833333	0	0.208333	0.708333	0	novel-mir-candidate-282-3p	144099206	144099229	CAGUCCUGAGCUCCACCCCCUCAG	24	0.166667	0.5	0.166667	0.166667	-3.3
novel-mir-candidate-340	1.5994	chr2	+	106345794	106345858	GGGGUGGGGCAAGGGGUUUGUCUGGAUUGCAGAUCGCAUUGCACAGACCCCUGGCUCUGACCCCC	65	0.153846	0.276923	0.215385	0.353846	-35.2	((((((((((.((((((((((......(((.....)))....)))))))))).))))).))))).			no	no	yes	novel-mir-candidate-340-5p	106345794	106345812	GGGGUGGGGCAAGGGGUUU	19	0.105263	0.0526316	0.210526	0.631579	0	novel-mir-candidate-340-3p	106345841	106345858	CCCCUGGCUCUGACCCCC	18	0.0555556	0.611111	0.166667	0.166667	0
novel-mir-candidate-375	1.5996	chr2	+	17584746	17584791	CCUGUCUCAGUACCCAAGGAUCACAGGCCUGGGCACUGCAGCAGGC	46	0.217391	0.347826	0.152174	0.282609	-19.8	(((((..((((.((((.((........)))))).))))..))))).	ENSG00000163032	protein_coding	yes	no	no	novel-mir-candidate-375-5p	17584746	17584764	CCUGUCUCAGUACCCAAGG	19	0.210526	0.368421	0.210526	0.210526	-0.1	novel-mir-candidate-375-3p	17584772	17584791	GCCUGGGCACUGCAGCAGGC	20	0.15	0.35	0.1	0.4	-7.8
novel-mir-candidate-407	1.61	chr1	+	242337216	242337279	AUACUUUCUAUUUUCUCUUCUAUUUUCAUAGAAGUAUAAACCUCAUGAGGCAGUAGAUUGUAUU	64	0.28125	0.15625	0.4375	0.125	-12.6	((((..((((((.((((((((((....)))))).............)))).))))))..)))).	ENSG00000180287	protein_coding	yes	no	no	novel-mir-candidate-407-5p	242337216	242337235	AUACUUUCUAUUUUCUCUUC	20	0.15	0.25	0.6	0	0	novel-mir-candidate-407-3p	242337260	242337279	AUGAGGCAGUAGAUUGUAUU	20	0.3	0.05	0.35	0.3	-0.3	ptr-miR-1827_MIMAT0008052
novel-mir-candidate-240	1.6126	chr1	+	46132487	46132544	CUCCGGUCGGUCUCGGAACCGAAGCUGCCGCAGCCUCGGGAAUGGGGCCGGCCGGAGA	58	0.155172	0.327586	0.12069	0.396552	-41.7	(((((((((((((((...((((.((((...)))).))))...))))))))))))))).	ENSG00000117461, ENSG00000278139	protein_coding, protein_coding	yes	yes	no	novel-mir-candidate-240-5p	46132487	46132508	CUCCGGUCGGUCUCGGAACCGA	22	0.136364	0.363636	0.181818	0.318182	-5	novel-mir-candidate-240-3p	46132523	46132544	CGGGAAUGGGGCCGGCCGGAGA	22	0.181818	0.227273	0.0454545	0.545455	-3.7
novel-mir-candidate-301	1.6133	chr11	+	1336274	1336344	GCCAGGGACCUGGGGCUUGUGGGUGUCGGCUCCCAUCCCGGGGUCCUCCCCCGCCGUCCUCCCCCCUCCCC	71	0.0422535	0.478873	0.183099	0.295775	-27.3	...((((....(((((..(((((....((((((......))))))....))))).)))))...))))....			no	no	yes	novel-mir-candidate-301-5p	1336274	1336294	GCCAGGGACCUGGGGCUUGUG	21	0.0952381	0.238095	0.190476	0.47619	-4.8	novel-mir-candidate-301-3p	1336322	1336344	CCCCGCCGUCCUCCCCCCUCCCC	23	0	0.782609	0.130435	0.0869565	0
novel-mir-candidate-199	1.6134	chr10	+	133242124	133242209	CUUAGGGCCCUGGCUCCAUCCUGCAGAUGAGGAGCUCUGGAAAAGGGCAAAGUCCCGGAGGCUGAGGAGUGGGGCGGGCUCCAAGU	86	0.209302	0.244186	0.162791	0.383721	-37.3	(((.((((((..((((((((((((...((.((((((((.....)))))....)))))...))..)))).)))))))))))).))).			no	no	yes	novel-mir-candidate-199-5p	133242124	133242143	CUUAGGGCCCUGGCUCCAUC	20	0.1	0.4	0.25	0.25	-3.4	novel-mir-candidate-199-3p	133242192	133242209	GUGGGGCGGGCUCCAAGU	18	0.111111	0.222222	0.166667	0.5	-4.8	ptr-miR-1296_MIMAT0008015
novel-mir-candidate-276	1.6236	chr8	-	143013613	143013653	AGGCUGACUCUCUGGCUGGGCUGCCGUGAGGUGAGCUCGCU	41	0.097561	0.268293	0.243902	0.390244	-17.8	.((((.((.(((((((......)))).))))).))))....	ENSG00000247317	lincRNA	yes	no	no	novel-mir-candidate-276-5p	143013635	143013653	AGGCUGACUCUCUGGCUGG	19	0.105263	0.263158	0.263158	0.368421	-2.4	novel-mir-candidate-276-3p	143013613	143013631	GCCGUGAGGUGAGCUCGCU	19	0.105263	0.263158	0.210526	0.421053	-6.3
novel-mir-candidate-293	1.6251	chr17	+	78134807	78134866	GGGGCGGGGAGCAGACAGGGGCCCCCCAGCACGCGGGCUCCCCUGACCUGCCUUUUCCCG	60	0.116667	0.4	0.116667	0.366667	-30.2	.(((.((((.((((.((((((..(((........)))..))))))..)))))))).))).	ENSG00000167895	protein_coding	yes	no	no	novel-mir-candidate-293-5p	78134807	78134830	GGGGCGGGGAGCAGACAGGGGCCC	24	0.166667	0.25	0	0.583333	-5.5	novel-mir-candidate-293-3p	78134844	78134866	CUCCCCUGACCUGCCUUUUCCCG	23	0.0434783	0.521739	0.304348	0.130435	0
novel-mir-candidate-334	1.6255	chr12	-	5841071	5841121	CUGGCUCAGCGUGUGCCUGUGUGCCUCUCGCAGGCACCACCUGGCGGGGAG	51	0.0980392	0.333333	0.196078	0.372549	-26.6	((.((.(((.(((((((((((.......)))))))).)))))))).))...	ENSG00000047617	protein_coding	yes	no	no	novel-mir-candidate-334-5p	5841104	5841121	CUGGCUCAGCGUGUGCCU	18	0.0555556	0.333333	0.277778	0.333333	-4.2	novel-mir-candidate-334-3p	5841071	5841089	GGCACCACCUGGCGGGGAG	19	0.157895	0.315789	0.0526316	0.473684	-3
novel-mir-candidate-46	1.6287	chr12	+	6960019	6960084	GGUGGGGGGUGAGCAGCCCCUCGGUGUCCGCCUAUGCCUGGACCUGAGGUUUGACUGCCCCCCACC	66	0.106061	0.348485	0.19697	0.348485	-40	((((((((((.(((((..((((((.(((((........))))))))))).))).))))))))))))	ENSG00000111679	protein_coding	yes	no	no	novel-mir-candidate-46-5p	6960019	6960044	GGUGGGGGGUGAGCAGCCCCUCGGUG	26	0.0769231	0.230769	0.153846	0.538462	-12.9	novel-mir-candidate-46-3p	6960052	6960084	AUGCCUGGACCUGAGGUUUGACUGCCCCCCACC	33	0.151515	0.393939	0.212121	0.242424	-3.4
novel-mir-candidate-146	1.6376	chr4	+	140152287	140152348	CAAAGGGGGUGAGCUGGGGAGAGGAGGCGAGAGGCUCUCCUUCCCCGCUUCCCCCCUAGGGG	62	0.16129	0.290323	0.145161	0.403226	-38.9	...((((((.((((.(((((.(((((((.....)).)))))))))))))).)))))).....	ENSG00000196782	protein_coding	yes	no	no	novel-mir-candidate-146-5p	140152287	140152309	CAAAGGGGGUGAGCUGGGGAGAG	23	0.26087	0.0869565	0.0869565	0.565217	0	novel-mir-candidate-146-3p	140152324	140152348	UCCUUCCCCGCUUCCCCCCUAGGGG	25	0.04	0.52	0.24	0.2	-5.6
novel-mir-candidate-138	1.6456	chr7	-	149091113	149091169	CGGGGGCGGCUUUGGGAGGAACCGCACCGGAGGUUCCCCUCUCGCUGCCUCUCAGUC	57	0.105263	0.350877	0.192982	0.350877	-30.5	.(((((((((...(((.((((((........)))))))))...))))))))).....			no	no	yes	novel-mir-candidate-138-5p	149091146	149091169	CGGGGGCGGCUUUGGGAGGAACCG	24	0.125	0.208333	0.125	0.541667	-2.7	novel-mir-candidate-138-3p	149091113	149091136	UUCCCCUCUCGCUGCCUCUCAGUC	24	0.0416667	0.5	0.333333	0.125	-1.6
novel-mir-candidate-417	1.6473	chr1	-	100351621	100351683	UGCUCCGGUCCCGGAGGGGCGGGGCGAGACCGCUGAGCCAGCCUGGGCGGGCGCGGAGGGAAC	63	0.126984	0.301587	0.0793651	0.492063	-31.1	..(((((..((((...((((((((((....))))...)).))))...))))..))))).....	ENSG00000079335	protein_coding	yes	no	no	novel-mir-candidate-417-5p	100351663	100351683	UGCUCCGGUCCCGGAGGGGCG	21	0.047619	0.333333	0.142857	0.47619	-7.7	novel-mir-candidate-417-3p	100351621	100351641	CUGGGCGGGCGCGGAGGGAAC	21	0.142857	0.238095	0.047619	0.571429	-1.5	ggo-miR-1228_MIMAT0024229
novel-mir-candidate-117	1.652	chr17	-	3676702	3676763	AGUGGGGUCCAGGGACCGGAGCCUGCUAGAAAUGCAGGUCCCAGCUCCCCCGCCCCCCACCC	62	0.177419	0.419355	0.112903	0.290323	-29.5	.((((((....((((..((.((((((.......)))))).))...)))).....))))))..	ENSG00000257950, ENSG00000083454	protein_coding, protein_coding	yes	no	no	novel-mir-candidate-117-5p	3676740	3676763	AGUGGGGUCCAGGGACCGGAGCCU	24	0.166667	0.25	0.125	0.458333	-7.7	novel-mir-candidate-117-3p	3676702	3676725	UCCCAGCUCCCCCGCCCCCCACCC	24	0.0833333	0.75	0.0833333	0.0833333	-0.4
novel-mir-candidate-253	1.655	chr5	+	11313261	11313308	AGCAGCAGGAAACAGGGCUAGGAUCUUACAGGCCUGUGCAGGCUCCCC	48	0.25	0.291667	0.145833	0.3125	-11.6	...(((.....(((((.((..........)).)))))....)))....	ENSG00000169862	protein_coding	yes	no	no	novel-mir-candidate-253-5p	11313261	11313279	AGCAGCAGGAAACAGGGCU	19	0.368421	0.210526	0.0526316	0.368421	-0.2	novel-mir-candidate-253-3p	11313291	11313308	GGCCUGUGCAGGCUCCCC	18	0.0555556	0.444444	0.166667	0.333333	-5.2	ggo-miR-214_MIMAT0002550
novel-mir-candidate-66	1.6553	chr10	-	102642762	102642823	UCGGCGGGCCGGGCAGUCCGUGGCGGCCCUUUCCUGCCUCGACUUGCUCGGGCCCGGCUCUC	62	0.0322581	0.403226	0.209677	0.354839	-31.7	..(((((((((((((((.((.(((((.......))))).)))).))))).))))).)))...	ENSG00000272933	lincRNA	no	no	no	novel-mir-candidate-66-5p	102642798	102642823	UCGGCGGGCCGGGCAGUCCGUGGCGG	26	0.0384615	0.307692	0.115385	0.538462	-8.4	novel-mir-candidate-66-3p	102642762	102642785	UCGACUUGCUCGGGCCCGGCUCUC	24	0.0416667	0.416667	0.25	0.291667	-3
novel-mir-candidate-430	1.6565	chr17	+	58318423	58318483	GCCCAGGGGAGCCCGGCGGGAGGUCAAGGUCUAAAGAGAAGAUGGCACGUGGGCUUGGGGU	61	0.213115	0.196721	0.131148	0.459016	-19.2	.((((....((((((.((....((((...(((....)))...)))).))))))))))))..	ENSG00000005379	protein_coding	no	no	no	novel-mir-candidate-430-5p	58318423	58318442	GCCCAGGGGAGCCCGGCGGG	20	0.1	0.35	0	0.55	-6.8	novel-mir-candidate-430-3p	58318469	58318483	ACGUGGGCUUGGGGU	15	0.0666667	0.133333	0.266667	0.533333	0
novel-mir-candidate-350	1.6577	chr21	+	42321286	42321367	GUGAGGGAAGAGGGAAGGGAAGGACACAUUGAACGAUCCCAGUGGCUUGUCUCAUGGUGACCUCUCCCUUCCUGCCCUGGCC	82	0.207317	0.268293	0.207317	0.317073	-37.8	((.((((....((((((((((((.(((..(((((((.((....)).)))).)))..))).))).))))))))).)))).)).			no	no	yes	novel-mir-candidate-350-5p	42321286	42321306	GUGAGGGAAGAGGGAAGGGAA	21	0.380952	0	0.047619	0.571429	0	novel-mir-candidate-350-3p	42321345	42321367	ACCUCUCCCUUCCUGCCCUGGCC	23	0.0434783	0.565217	0.26087	0.130435	-0.5
novel-mir-candidate-134	1.6603	chr18	-	5295449	5295506	UGGCCGCCCCCGCUCGCACCGCCGCAGUGCACCGCGGUGGGGGUGGGGACGGCCCGAA	58	0.103448	0.396552	0.0862069	0.413793	-41.4	.(((((.((((((((.((((((.((...))...)))))).)))))))).)))))....	ENSG00000198081	protein_coding	yes	no	no	novel-mir-candidate-134-5p	5295485	5295506	UGGCCGCCCCCGCUCGCACCGC	22	0.0454545	0.590909	0.0909091	0.272727	-2.1	novel-mir-candidate-134-3p	5295449	5295470	GUGGGGGUGGGGACGGCCCGAA	22	0.136364	0.181818	0.0909091	0.590909	-7.9
novel-mir-candidate-3	1.6617	chr19	+	39099216	39099281	GGGGCGCGCGGGUCGGGGGCGGUGCUAGGACCGUGGAGGGGACAGGGCUGGGGCCAGUGUGUCUCU	66	0.0909091	0.212121	0.151515	0.545455	-26.4	(((((((((.((((.....((((.((....((......))...)).)))).)))).))))))))).	ENSG00000183760	protein_coding	yes	no	no	novel-mir-candidate-3-5p	39099216	39099234	GGGGCGCGCGGGUCGGGGG	19	0	0.210526	0.0526316	0.736842	-2.6	novel-mir-candidate-3-3p	39099262	39099281	GCUGGGGCCAGUGUGUCUCU	20	0.05	0.25	0.3	0.4	-4.2
novel-mir-candidate-357	1.6659	chr17	+	57116025	57116111	ACGCAGGGAGGUGGGUAGUGGCCAGGUGGCCCUUGGUGCCCUGCCCUGGCCCAGGCGUUCCACGCACUCUGCUCCCUACCCUGCAGU	87	0.114943	0.356322	0.195402	0.333333	-42.3	..(((((((((.((((((.(((((((.(((.......)))....))))))).((((((...)))).))))))))))).))))))...	ENSG00000121057	protein_coding	yes	no	no	novel-mir-candidate-357-5p	57116025	57116048	ACGCAGGGAGGUGGGUAGUGGCCA	24	0.208333	0.166667	0.125	0.5	-3.7	novel-mir-candidate-357-3p	57116089	57116111	CACUCUGCUCCCUACCCUGCAGU	23	0.130435	0.478261	0.26087	0.130435	-3.9
novel-mir-candidate-328	1.6678	chr19	+	54148077	54148148	CUGAGGUGGGGGUGGUGAGGGAGACCAGCUGGCCCACUGGGUCCUGACCCUCUGCUCUCUCCCACCCGCAGU	72	0.125	0.333333	0.194444	0.347222	-34.2	(((.((((((((.((((((((....(((..(((((...)))))))).))))).)))..))))))))..))).	ENSG00000088038	protein_coding	no	no	no	novel-mir-candidate-328-5p	54148077	54148099	CUGAGGUGGGGGUGGUGAGGGAG	23	0.130435	0.0434783	0.173913	0.652174	0	novel-mir-candidate-328-3p	54148129	54148148	UGCUCUCUCCCACCCGCAGU	20	0.1	0.5	0.25	0.15	-0.5
novel-mir-candidate-391	1.6748	chr3	+	51813668	51813716	GGCCAGCUGGGAAGGCCAGGAUUCCGCAGGCCUGUGCUUGGCAGGGCCC	49	0.142857	0.306122	0.142857	0.408163	-22.2	((((.((((((.(((((.((...))...)))))...))))))..)))).			no	no	yes	novel-mir-candidate-391-5p	51813668	51813686	GGCCAGCUGGGAAGGCCAG	19	0.210526	0.263158	0.0526316	0.473684	-6.8	novel-mir-candidate-391-3p	51813701	51813716	GUGCUUGGCAGGGCCC	16	0.0625	0.3125	0.1875	0.4375	-2.1	ggo-miR-218_MIMAT0002565
novel-mir-candidate-204	1.6767	chr1	+	223762097	223762186	GUGGGAGGUGGCUGCCAUGGAAGGGCGGGCAGACACUUGGUGUCAUGCCUCGCUCUGAUGCAUUCUCAUGUCUCUGCCUCACCUUCCAGU	90	0.144444	0.277778	0.266667	0.311111	-39.8	.(((((((((((...(((((((((((((((((((((...))))).)))).)))))).......)).)))).....)))..))))))))..	ENSG00000162909	protein_coding	no	no	no	novel-mir-candidate-204-5p	223762097	223762119	GUGGGAGGUGGCUGCCAUGGAAG	23	0.173913	0.130435	0.173913	0.521739	-7.1	novel-mir-candidate-204-3p	223762168	223762186	CUCUGCCUCACCUUCCAGU	19	0.105263	0.473684	0.315789	0.105263	0	ptr-miR-593_MIMAT0008264
novel-mir-candidate-124	1.6777	chr5	+	128083538	128083607	CUGGCUGGCCGCGCUCUUCGCACGGGGCGCUUUUGCGUGGGGUCGCGCAGGAGCCGCGGAGGGCCGGAUC	70	0.0714286	0.314286	0.171429	0.442857	-40	((((((..(((((((((((((((...((((....))))...)).))).))))).)))))..))))))...			no	no	yes	novel-mir-candidate-124-5p	128083538	128083559	CUGGCUGGCCGCGCUCUUCGCA	22	0.0454545	0.409091	0.227273	0.318182	-2.4	novel-mir-candidate-124-3p	128083582	128083607	GCGCAGGAGCCGCGGAGGGCCGGAUC	26	0.153846	0.307692	0.0384615	0.5	-4.7
novel-mir-candidate-102	1.6909	chr9	+	136327326	136327379	CUGGGGUGGGGUGGGCUGGGGCCCACACCCCCUCCCCCCUCCCCCCUCCCCGGG	54	0.037037	0.5	0.12963	0.333333	-31.2	((((((.((((.(((..((((.......))))..))).....)))).)))))).			no	no	yes	novel-mir-candidate-102-5p	136327326	136327344	CUGGGGUGGGGUGGGCUGG	19	0	0.105263	0.210526	0.684211	0	novel-mir-candidate-102-3p	136327360	136327379	CCCCCUCCCCCCUCCCCGGG	20	0	0.75	0.1	0.15	-2.6
novel-mir-candidate-103	1.6919	chr22	+	31753998	31754083	UGAGCGCUACACGGUCGGGGCGGGCCUAGUAGGCGCUUCAGGCUUAGGGGCGGAACAGCGCGGGCCGCGCGGGCGUAGGCGGGGUA	86	0.139535	0.255814	0.127907	0.476744	-33.6	....((((..(((.(((..((((.((......(((((((..(((....))).))..))))))).)))).))).))).)))).....	ENSG00000100150	protein_coding	yes	no	no	novel-mir-candidate-103-5p	31753998	31754018	UGAGCGCUACACGGUCGGGGC	21	0.142857	0.285714	0.142857	0.428571	-3.3	novel-mir-candidate-103-3p	31754064	31754083	GCGCGGGCGUAGGCGGGGUA	20	0.1	0.2	0.1	0.6	-4.1
novel-mir-candidate-42	1.6922	chr2	-	84833747	84833798	UGACAGCCCCUGGGCACUCCUGAUGCCCGAAGUGCCCAGGGGCUGUGAGCCC	52	0.153846	0.365385	0.153846	0.326923	-34.5	..((((((((((((((((............))))))))))))))))......	ENSG00000186854	protein_coding	yes	no	no	novel-mir-candidate-42-5p	84833775	84833798	UGACAGCCCCUGGGCACUCCUGAU	24	0.166667	0.375	0.208333	0.25	-3.6	novel-mir-candidate-42-3p	84833747	84833766	UGCCCAGGGGCUGUGAGCCC	20	0.1	0.35	0.15	0.4	-6.2
novel-mir-candidate-157	1.6926	chrX	-	48597566	48597626	AUCGGGGACCACCUCCGGGGCUGCCUCCGGUUCUUGAGGCCCCCCGGAGCGGCCCUGAGAC	61	0.114754	0.393443	0.147541	0.344262	-37.7	.((((((.((..((((((((..(((((........))))).)))))))).))))))))...	ENSG00000101940	protein_coding	yes	yes	no	novel-mir-candidate-157-5p	48597601	48597626	AUCGGGGACCACCUCCGGGGCUGCCU	26	0.115385	0.384615	0.153846	0.346154	-7.5	novel-mir-candidate-157-3p	48597566	48597587	CCCCCCGGAGCGGCCCUGAGAC	22	0.136364	0.5	0.0454545	0.318182	-1
novel-mir-candidate-275	1.696	chr16	-	88705903	88705959	CAGCCGCAGGCGCCCGGUCCGACUGCUGCUUCGGUUCACCGGGCGACCUGCGGCCCU	57	0.0877193	0.421053	0.157895	0.333333	-40	..((((((((((((((((((((........))))...)))))))).))))))))...	ENSG00000158717	protein_coding	yes	no	no	novel-mir-candidate-275-5p	88705936	88705959	CAGCCGCAGGCGCCCGGUCCGACU	24	0.125	0.458333	0.0833333	0.333333	-3.6	novel-mir-candidate-275-3p	88705903	88705924	UCACCGGGCGACCUGCGGCCCU	22	0.0909091	0.454545	0.136364	0.318182	-8.3
novel-mir-candidate-235	1.6999	chr19	+	13151751	13151808	GUCGGGGAUGGGGAGGGGCGUGGCCGGAGCGCAAAGCCCCGCCCCUCCGCGCCCCCCC	58	0.103448	0.413793	0.0689655	0.413793	-37.4	...((((.((.(((((((((.(((...........))).))))))))).)).))))..	ENSG00000160888	protein_coding	yes	no	no	novel-mir-candidate-235-5p	13151751	13151772	GUCGGGGAUGGGGAGGGGCGUG	22	0.0909091	0.0909091	0.136364	0.681818	-1.3	novel-mir-candidate-235-3p	13151784	13151808	AAGCCCCGCCCCUCCGCGCCCCCCC	25	0.08	0.72	0.04	0.16	-2.2
novel-mir-candidate-262	1.7001	chr19	-	3964372	3964431	GUGGGGGUGAGGGUGGGGGAGGCCCGUGCUUUCCCUGCUGAGCCUCCUCCCACCCCAGCC	60	0.0833333	0.35	0.183333	0.383333	-36.7	....((.((.(((((((((((((.((.((.......)))).)))))).))))))))).))	ENSG00000167657	protein_coding	no	no	no	novel-mir-candidate-262-5p	3964413	3964431	GUGGGGGUGAGGGUGGGGG	19	0.0526316	0	0.157895	0.789474	0	novel-mir-candidate-262-3p	3964372	3964394	CUGAGCCUCCUCCCACCCCAGCC	23	0.130435	0.608696	0.130435	0.130435	-0.4
novel-mir-candidate-238	1.7023	chr1	-	1205491	1205548	UGGGGAGGAGGGGGCCUCAGCCCAGCUGCUGGGGGGCUGGCCUGUCUCCUGCCCAGGC	58	0.0862069	0.310345	0.155172	0.448276	-34.6	((((.(((((((((((....(((((...))))).....))))).)))))).))))...	ENSG00000186891	protein_coding	no	yes	no	novel-mir-candidate-238-5p	1205526	1205548	UGGGGAGGAGGGGGCCUCAGCCC	23	0.130435	0.26087	0.0869565	0.521739	-9.7	novel-mir-candidate-238-3p	1205491	1205512	CUGGCCUGUCUCCUGCCCAGGC	22	0.0454545	0.454545	0.227273	0.272727	-5.5
novel-mir-candidate-379	1.7054	chr8	+	80977384	80977429	GGCCUCAUCCCAGAACCACCAAAUCAGAACCUCGGGGCUGGGGCCC	46	0.23913	0.391304	0.108696	0.26087	-17.2	(((((((.(((.((.................)).))).))))))).	ENSG00000076641	protein_coding	yes	no	no	novel-mir-candidate-379-5p	80977384	80977402	GGCCUCAUCCCAGAACCAC	19	0.263158	0.473684	0.105263	0.157895	-0.5	novel-mir-candidate-379-3p	80977411	80977429	AACCUCGGGGCUGGGGCCC	19	0.105263	0.368421	0.105263	0.421053	-5.4
novel-mir-candidate-393	1.716	chr2	-	237689685	237689730	GCCUCCUCCUCCUCCUCCAUAGCAGGAAGGAAGCUGGGCACCAGAC	46	0.217391	0.391304	0.152174	0.23913	-13	((((..(((((((.((....)).))).))))....)))).......	ENSG00000124831	protein_coding	yes	no	no	novel-mir-candidate-393-5p	237689712	237689730	GCCUCCUCCUCCUCCUCCA	19	0.0526316	0.631579	0.263158	0.0526316	0	novel-mir-candidate-393-3p	237689685	237689708	CAGGAAGGAAGCUGGGCACCAGAC	24	0.333333	0.25	0.0416667	0.375	-3.4
novel-mir-candidate-277	1.7176	chr16	+	11657317	11657401	CUUCCCCAGUGGCUGAGCCUGGGCUGGGGCUGCCUGGGAGGAAUCCUCCAGGAGCCCCAGGUCCCCAAGGAGGUCUUGGGAGGGC	85	0.141176	0.305882	0.164706	0.388235	-48.2	((((((....((((...((((((((((((((.(((((.(((...))))))))))))))))...))).))).))))..))))))..			no	no	yes	novel-mir-candidate-277-5p	11657317	11657335	CUUCCCCAGUGGCUGAGCC	19	0.105263	0.421053	0.210526	0.263158	-1.3	novel-mir-candidate-277-3p	11657384	11657401	AGGAGGUCUUGGGAGGGC	18	0.166667	0.111111	0.166667	0.555556	-0.8
novel-mir-candidate-288	1.7278	chr2	-	85561282	85561343	CGCUGGUCUCAGAGGGGCGGGGGCGGGAGGACGCCCAGUGUCUCCCGGUGAGGCGGGGGGGG	62	0.0967742	0.241935	0.112903	0.548387	-29.7	..((.((((((..((((((.(((((......)))))..)))..)))..)))))).)).....	ENSG00000115486	protein_coding	yes	no	no	novel-mir-candidate-288-5p	85561325	85561343	CGCUGGUCUCAGAGGGGCG	19	0.105263	0.263158	0.157895	0.473684	-3.8	novel-mir-candidate-288-3p	85561282	85561300	CCCGGUGAGGCGGGGGGGG	19	0.0526316	0.210526	0.0526316	0.684211	-7.1
novel-mir-candidate-343	1.7291	chr7	+	31102490	31102580	CUAGGGCCAGAGGCAGGCAGGGGAACUCCAGGAGAGCUGCCUCAGGAAGCACUGCAGUCCUCCGGCCCUUCCUCCCCUGCCUGGCCCACUU	91	0.175824	0.373626	0.153846	0.296703	-46.5	...((((((..((((((..((((((..((.((((.(((((...((......))))))).))))))...)))))).))))))))))))....	ENSG00000078549	protein_coding	yes	no	no	novel-mir-candidate-343-5p	31102490	31102512	CUAGGGCCAGAGGCAGGCAGGGG	23	0.217391	0.217391	0.0434783	0.521739	-3.6	novel-mir-candidate-343-3p	31102555	31102580	CCCUUCCUCCCCUGCCUGGCCCACUU	26	0.0384615	0.576923	0.269231	0.115385	-0.4
novel-mir-candidate-370	1.7317	chr4	+	8744567	8744622	GCGGCGGGCACUGGGGCCCUGGACCAGCCUCCAGCUGAACCCCAUGCCCAGCCUUC	56	0.142857	0.428571	0.125	0.303571	-28.9	..((((((((.(((((..(((((......))))).....)))))))))).)))...			no	no	yes	novel-mir-candidate-370-5p	8744567	8744585	GCGGCGGGCACUGGGGCCC	19	0.0526316	0.368421	0.0526316	0.526316	-6.3	novel-mir-candidate-370-3p	8744604	8744622	AACCCCAUGCCCAGCCUUC	19	0.210526	0.526316	0.157895	0.105263	0
novel-mir-candidate-358	1.7331	chr11	+	117220916	117220955	CUCUCUGUGUGGUUCUGAGGUGGGGAGCGAGAAUGGGGCA	40	0.15	0.15	0.25	0.45	-8.6	..((((((...(((((.......)))))....))))))..	ENSG00000160613	protein_coding	yes	no	no	novel-mir-candidate-358-5p	117220916	117220934	CUCUCUGUGUGGUUCUGAG	19	0.0526316	0.210526	0.421053	0.315789	-0.1	novel-mir-candidate-358-3p	117220937	117220955	GGGGAGCGAGAAUGGGGCA	19	0.263158	0.105263	0.0526316	0.578947	-0.9
novel-mir-candidate-114	1.7401	chr19	+	5978304	5978361	CCAUCUCCCGCCUCCUUUUCCCGCCGACUGAGAGGGCGGGGAAAGGGCCGGGAAGGGC	58	0.155172	0.344828	0.137931	0.362069	-33.2	((...(((((..(((((((((((((.........))))))))))))).))))).))..			no	no	yes	novel-mir-candidate-114-5p	5978304	5978328	CCAUCUCCCGCCUCCUUUUCCCGCC	25	0.04	0.6	0.28	0.08	0	novel-mir-candidate-114-3p	5978339	5978361	GCGGGGAAAGGGCCGGGAAGGGC	23	0.217391	0.173913	0	0.608696	-3.8
novel-mir-candidate-315	1.7517	chr1	-	156153849	156153902	GCUGCCUGGGCAGGGGUGGCUGGCCGGCUCCCAGCCUCUGCAGCUCCCCGGCCC	54	0.0555556	0.425926	0.148148	0.37037	-28	.......((((.((((.(((((...((((...))))....))))))))).))))	ENSG00000196189	protein_coding	yes	no	no	novel-mir-candidate-315-5p	156153884	156153902	GCUGCCUGGGCAGGGGUGG	19	0.0526316	0.210526	0.157895	0.578947	-5.6	novel-mir-candidate-315-3p	156153849	156153871	CAGCCUCUGCAGCUCCCCGGCCC	23	0.0869565	0.565217	0.130435	0.217391	-2.3
novel-mir-candidate-366	1.7557	chrX	+	70455147	70455220	CUCCUCCCCUCCUCCCGCGCGCCCCGCUUUGUGUCCGUGGUCUCCCGCGCGGGACGGAGGGACUGGCCGGAGCU	74	0.0540541	0.432432	0.189189	0.324324	-37.2	(((((((((((((((((((((..((((.........)))).....))))))))).))))))...))..))))..	ENSG00000082458, ENSG00000231651	protein_coding, antisense	yes	yes	no	novel-mir-candidate-366-5p	70455147	70455166	CUCCUCCCCUCCUCCCGCGC	20	0	0.7	0.2	0.1	0	novel-mir-candidate-366-3p	70455199	70455220	GACGGAGGGACUGGCCGGAGCU	22	0.181818	0.227273	0.0909091	0.5	-2.2
novel-mir-candidate-185	1.7579	chr10	+	38094827	38094892	AAUGGGGUGGGGGGAAGCGCCCGCGGGGCGGGGAGGGACCCUGCAGGCGCGGACUCCACACCCAGC	66	0.166667	0.30303	0.0606061	0.469697	-39.1	..((((((((((....(((((.((((((..........)))))).)))))...)))))).))))..	ENSG00000075407	protein_coding	yes	no	no	novel-mir-candidate-185-5p	38094827	38094850	AAUGGGGUGGGGGGAAGCGCCCGC	24	0.166667	0.208333	0.0833333	0.541667	-8.8	novel-mir-candidate-185-3p	38094874	38094892	CGCGGACUCCACACCCAGC	19	0.210526	0.526316	0.0526316	0.210526	-0.7
novel-mir-candidate-256	1.7618	chr11	-	133955903	133955960	CCCACGCCGCCCUCCCCAGGCUGCGAGGCAGAGCUGGCUGGGGGCGGCGGCGGGGGAG	58	0.103448	0.362069	0.0689655	0.465517	-39.8	(((.(((((((.(((((((...((........))...))))))).))))))))))...	ENSG00000080854	protein_coding	yes	no	no	novel-mir-candidate-256-5p	133955940	133955960	CCCACGCCGCCCUCCCCAGGC	21	0.0952381	0.666667	0.047619	0.190476	-2.8	novel-mir-candidate-256-3p	133955903	133955922	UGGGGGCGGCGGCGGGGGAG	20	0.05	0.15	0.05	0.75	-1.8
novel-mir-candidate-284	1.7632	chr11	-	72698105	72698183	UGUAAGCCAAGGAGCUGGGGCAUUGGGGCAGGCAGUGCCGUUGGCUGAUGCUGUCUCCCCCGGCGCCUCUCUGCCAGGC	79	0.126582	0.303797	0.202532	0.367089	-37.5	.....(((..((((..(((((.((((((.((((((((((...)))....))))))).)))))).))))).)).)).)))	ENSG00000186635	protein_coding	no	no	no	novel-mir-candidate-284-5p	72698155	72698183	UGUAAGCCAAGGAGCUGGGGCAUUGGGGC	29	0.206897	0.172414	0.172414	0.448276	-5.9	novel-mir-candidate-284-3p	72698105	72698128	UCCCCCGGCGCCUCUCUGCCAGGC	24	0.0416667	0.541667	0.166667	0.25	-6.4
novel-mir-candidate-16	1.7712	chr16	-	30571618	30571677	CGGCGGCUCCAGGGACCUGGCGGCCGCCGAUCGGGGCUGCGAGGCCCCAUGGCGCCGCCC	60	0.0833333	0.416667	0.0833333	0.416667	-45.8	.((((((.((((((.(((.((((((.((....)))))))).))).))).))).)))))).	ENSG00000229809	protein_coding	yes	yes	no	novel-mir-candidate-16-5p	30571657	30571677	CGGCGGCUCCAGGGACCUGGC	21	0.0952381	0.380952	0.0952381	0.428571	-3.9	novel-mir-candidate-16-3p	30571618	30571640	UGCGAGGCCCCAUGGCGCCGCCC	23	0.0869565	0.478261	0.0869565	0.347826	-9
novel-mir-candidate-291	1.7925	chr19	-	43774646	43774703	UCAGGGCGCAGGCAGGCGCGGGCCGCCGCCUGACCUGCGCCUGACCUGCUCCUGACCC	58	0.103448	0.431034	0.12069	0.344828	-39.1	((((((.(((((((((((((((.((.....)).)))))))))).)))))))))))...	ENSG00000104783	protein_coding	yes	no	no	novel-mir-candidate-291-5p	43774681	43774703	UCAGGGCGCAGGCAGGCGCGGGC	23	0.130435	0.304348	0.0434783	0.521739	-6.8	novel-mir-candidate-291-3p	43774646	43774668	UGCGCCUGACCUGCUCCUGACCC	23	0.0869565	0.478261	0.217391	0.217391	-0.2
novel-mir-candidate-242	1.7945	chr12	+	131908847	131908896	GCGGGGAGGGGCUCCGGGGCCGGCGCCGGUCCUGACGCUUCUCUCCCGCA	50	0.06	0.38	0.14	0.42	-36.9	((((((((((((..((((((((....))))))))..))))))).))))).	ENSG00000177169	protein_coding	yes	no	no	novel-mir-candidate-242-5p	131908847	131908868	GCGGGGAGGGGCUCCGGGGCCG	22	0.0454545	0.272727	0.0454545	0.636364	-6.3	novel-mir-candidate-242-3p	131908876	131908896	UCCUGACGCUUCUCUCCCGCA	21	0.0952381	0.47619	0.285714	0.142857	0
novel-mir-candidate-9	1.7966	chr3	-	47681263	47681342	UCCCCAGCACCUCCACCAAAAAUAAAAACUAAAAAGUUAUUAAUUUAUCACAGUGUUUCUGAGGGCUGGACAAAGGCUCA	80	0.375	0.2375	0.2375	0.15	-15.6	...(((((.(((((((.....(((((((((....)))).....)))))....))).....)))))))))...........	ENSG00000173473	protein_coding	yes	no	no	novel-mir-candidate-9-5p	47681314	47681342	UCCCCAGCACCUCCACCAAAAAUAAAAAC	29	0.448276	0.413793	0.103448	0.0344828	0	novel-mir-candidate-9-3p	47681263	47681281	AGGGCUGGACAAAGGCUCA	19	0.315789	0.210526	0.105263	0.368421	-5.5
novel-mir-candidate-418	1.7969	chr11	-	65540830	65540871	GGUAAGCGCCCUGCGGCUCCGCCCGCCCCGCGCCCUCUCACC	42	0.0714286	0.547619	0.119048	0.261905	-12.9	((...((((...((((......))))...)))))).......	ENSG00000168056	protein_coding	no	no	no	novel-mir-candidate-418-5p	65540854	65540871	GGUAAGCGCCCUGCGGCU	18	0.111111	0.333333	0.166667	0.388889	-3.6	novel-mir-candidate-418-3p	65540830	65540848	CGCCCCGCGCCCUCUCACC	19	0.0526316	0.684211	0.105263	0.157895	-0.8
novel-mir-candidate-61	1.7971	chr22	+	32128286	32128368	AGGCCCUGGGGGUGGGGCCCUGGAGGUGUCCCGGAAAAAACGGAACACCUGUCCUCCAGGAACACCCUGUCCUCCAGGAGCUC	83	0.204819	0.325301	0.144578	0.325301	-45.7	.((((((((((((((((.(((((((((((.(((.......))).))))).....))))))....))))).)))))))).))).	ENSG00000234479	transcribed_unprocessed_pseudogene	yes	no	no	novel-mir-candidate-61-5p	32128286	32128306	AGGCCCUGGGGGUGGGGCCCU	21	0.047619	0.285714	0.142857	0.52381	-11.6	novel-mir-candidate-61-3p	32128350	32128368	CCCUGUCCUCCAGGAGCUC	19	0.105263	0.473684	0.210526	0.210526	-4.3	ppy-miR-339-5p_MIMAT0015842
novel-mir-candidate-53	1.8079	chrX	+	119399349	119399409	GCCGGAGAGCCCCAGGCCCGAGCCACGCGGUCUUCCGGGCCCGGGUCGGGGCUCGAUGGCU	61	0.0983607	0.377049	0.114754	0.409836	-43.1	((((..(((((((.((((((.(((...(((....)))))).)))))))))))))..)))).	ENSG00000077713	protein_coding	no	no	no	novel-mir-candidate-53-5p	119399349	119399371	GCCGGAGAGCCCCAGGCCCGAGC	23	0.173913	0.434783	0	0.391304	-6.7	novel-mir-candidate-53-3p	119399387	119399409	GCCCGGGUCGGGGCUCGAUGGCU	23	0.0434783	0.304348	0.173913	0.478261	-8.2
novel-mir-candidate-257	1.8201	chr14	-	32076763	32076824	CGGAGGGAGGGGGACGAGCGCGCGGGGCCGCGUCCUCGCUCGCGUCCCCGCUCCCUCCUCCC	62	0.0645161	0.435484	0.112903	0.387097	-45.1	.((((((((((((((..(((.((((((......)))))).))))))))).))))))))....	ENSG00000258655, ENSG00000100852	antisense, protein_coding	yes	no	no	novel-mir-candidate-257-5p	32076800	32076824	CGGAGGGAGGGGGACGAGCGCGCGG	25	0.16	0.2	0	0.64	0	novel-mir-candidate-257-3p	32076763	32076786	CUCGCGUCCCCGCUCCCUCCUCCC	24	0	0.666667	0.208333	0.125	-2.6
novel-mir-candidate-247	1.8243	chr2	+	158968807	158968876	CCGCGGGCCUGCGAGCGCCCCGGGCAUGGCCAGCUGCCAGUGUGCGGAGAGGUCGAGAGGGACCCGGGGU	70	0.128571	0.314286	0.1	0.457143	-32.7	((.(((((((.....(((((((.(((((((.....)))).))).)))...)).))...))).)))).)).	ENSG00000115183	protein_coding	yes	no	no	novel-mir-candidate-247-5p	158968807	158968825	CCGCGGGCCUGCGAGCGCC	19	0.0526316	0.473684	0.0526316	0.421053	-3.6	novel-mir-candidate-247-3p	158968855	158968876	GAGGUCGAGAGGGACCCGGGGU	22	0.181818	0.181818	0.0909091	0.545455	-5.9
novel-mir-candidate-316	1.8276	chr20	-	46354964	46355013	AGGGCAGGGCCGGACCAGACCUGAUGGUGCCUGUCCCCCGCCCUGCAGGC	50	0.14	0.38	0.12	0.36	-24.2	...(((((((.((((...(((....)))....))))...)))))))....	ENSG00000080189	protein_coding	no	no	no	novel-mir-candidate-316-5p	46354995	46355013	AGGGCAGGGCCGGACCAGA	19	0.263158	0.263158	0	0.473684	-2.9	novel-mir-candidate-316-3p	46354964	46354987	GUGCCUGUCCCCCGCCCUGCAGGC	24	0.0416667	0.5	0.166667	0.291667	-6.9
novel-mir-candidate-1	1.8409	chr4	+	7760790	7760832	AGCCCCGCAGGGGUCGGCCCCCUCACCUGACCUGUCCUCCGGC	43	0.0930233	0.488372	0.139535	0.27907	-13.1	....(((.(((((((((.........))))))...))).))).	ENSG00000272620, ENSG00000196526	antisense, protein_coding	yes	yes	no	novel-mir-candidate-1-5p	7760790	7760808	AGCCCCGCAGGGGUCGGCC	19	0.105263	0.421053	0.0526316	0.421053	-7.2	novel-mir-candidate-1-3p	7760814	7760832	ACCUGACCUGUCCUCCGGC	19	0.105263	0.473684	0.210526	0.210526	-0.5
novel-mir-candidate-317	1.8535	chr5	+	126423458	126423507	GCGGCCCGGCCUGGAUGCGCUGGGCGGAGGGUGCAGGGGAGGGCACGGCG	50	0.1	0.26	0.08	0.56	-21.9	.((((((..(((...((((((........)))))))))..)))).))...	ENSG00000155324	protein_coding	yes	yes	no	novel-mir-candidate-317-5p	126423458	126423478	GCGGCCCGGCCUGGAUGCGCU	21	0.047619	0.380952	0.142857	0.428571	-4.2	novel-mir-candidate-317-3p	126423488	126423507	GUGCAGGGGAGGGCACGGCG	20	0.15	0.2	0.05	0.6	-5.3	ppy-miR-1538_MIMAT0016235
novel-mir-candidate-156	1.8561	chr10	-	110007667	110007743	CCGCCCCCGCAGCCCCCUCCGCGCCCUCAAGCUCUAAGUCCGUGAAGCCGCAGCGGUGGGGGCCUGCAGGCCCGGCA	77	0.12987	0.454545	0.103896	0.311688	-35.1	(((..((.(((((((((.((((((..(((.(((...)))...)))....)).)))).))))).)))).))..)))..	ENSG00000203876, ENSG00000148700	processed_transcript, protein_coding	yes	no	no	novel-mir-candidate-156-5p	110007721	110007743	CCGCCCCCGCAGCCCCCUCCGCG	23	0.0434783	0.695652	0.0434783	0.217391	-1.1	novel-mir-candidate-156-3p	110007667	110007689	GGUGGGGGCCUGCAGGCCCGGCA	23	0.0869565	0.304348	0.0869565	0.521739	-10.7	ppy-miR-1909_MIMAT0016238
novel-mir-candidate-373	1.8634	chr6	+	127119452	127119526	CCCUUGCCUCUCGGCGCCCCUGCCUUCCGCAGCAUCCUAGCCGGUGCGAGGGGCGGGCGGACGCGGCGCUAAGGU	75	0.0933333	0.386667	0.16	0.36	-33.3	.((((((((....(((((((((((((.((((((......))...)))).)))))))).)).))))).)).)))).	ENSG00000146374	protein_coding	yes	no	no	novel-mir-candidate-373-5p	127119452	127119470	CCCUUGCCUCUCGGCGCCC	19	0	0.578947	0.210526	0.210526	-4.1	novel-mir-candidate-373-3p	127119510	127119526	GGACGCGGCGCUAAGGU	17	0.176471	0.235294	0.117647	0.470588	0
novel-mir-candidate-15	1.8824	chr17	-	7394528	7394582	CGGGUCGGGGGGCGGGGCCGGGGUCCGAGCUCGGGCCCGCCUCCGCCUCCGCCAG	55	0.0363636	0.4	0.0909091	0.472727	-38.8	..(((..(((((((((((..(((((((....)))))))))).)))))))))))..	ENSG00000187838, ENSG00000262481	protein_coding, protein_coding	yes	yes	no	novel-mir-candidate-15-5p	7394564	7394582	CGGGUCGGGGGGCGGGGCC	19	0	0.263158	0.0526316	0.684211	-3.4	novel-mir-candidate-15-3p	7394528	7394546	CCGCCUCCGCCUCCGCCAG	19	0.0526316	0.631579	0.105263	0.210526	0
novel-mir-candidate-57	1.8941	chr1	+	228735490	228735555	GAUCCACGGCGCUCGGACCGCUGUCCUCCAACAGCGCAGGGCAGAGCGGCUGGCGCCGCCGGAGCG	66	0.151515	0.378788	0.0909091	0.378788	-32.7	..(((.((((((.(((.((((((((((..........)))))..))))))))))))))..)))...	ENSG00000116574	protein_coding	no	yes	no	novel-mir-candidate-57-5p	228735490	228735509	GAUCCACGGCGCUCGGACCG	20	0.15	0.4	0.1	0.35	-1.8	novel-mir-candidate-57-3p	228735537	228735555	GGCUGGCGCCGCCGGAGCG	19	0.0526316	0.368421	0.0526316	0.526316	-6.1
novel-mir-candidate-28	1.9035	chr17	+	48725422	48725473	UCCCACCCGACCGCGGGCCAUAAACACUUGGCUGCGGCGGCCGCCGCGGGGU	52	0.134615	0.403846	0.115385	0.346154	-22.3	((((..(((....)))((((........)))).(((((....))))))))).	ENSG00000159184	protein_coding	no	yes	no	novel-mir-candidate-28-5p	48725422	48725441	UCCCACCCGACCGCGGGCCA	20	0.15	0.55	0.05	0.25	-5.8	novel-mir-candidate-28-3p	48725455	48725473	GCGGCGGCCGCCGCGGGGU	19	0	0.368421	0.0526316	0.578947	-10.1
novel-mir-candidate-361	1.915	chr12	+	130010050	130010090	CUCCCCGGCAUCACCACCACGCAGCGCCUGUGCUGGGGGUG	41	0.121951	0.414634	0.146341	0.317073	-15	.((((((((((..................))))))))))..			no	no	yes	novel-mir-candidate-361-5p	130010050	130010068	CUCCCCGGCAUCACCACCA	19	0.210526	0.578947	0.105263	0.105263	-0.4	novel-mir-candidate-361-3p	130010072	130010090	AGCGCCUGUGCUGGGGGUG	19	0.0526316	0.210526	0.210526	0.526316	-4.7
novel-mir-candidate-292	1.9245	chrX	+	43277869	43277919	GGCGGGCGGCGGAGGGGCGGGGAAGGAGGGGGCUCCCAGGGCAGCCUGGCC	51	0.117647	0.254902	0.0392157	0.588235	-20.2	(((((((.((...(((((.............)))))....)).)))).)))			no	no	yes	novel-mir-candidate-292-5p	43277869	43277887	GGCGGGCGGCGGAGGGGCG	19	0.0526316	0.210526	0	0.736842	-2	novel-mir-candidate-292-3p	43277900	43277919	GCUCCCAGGGCAGCCUGGCC	20	0.1	0.45	0.1	0.35	-8.1
novel-mir-candidate-47	1.9363	chr19	+	1081764	1081824	CAGCGAGGAGGCGGGAGUGGGCCGAGGCUGAUGGGCCUCCCCACCCCCGGGCUCCCGCAGG	61	0.131148	0.360656	0.0819672	0.42623	-39.1	..(((.((((.((((.(((((..((((((....))))))))))).))))..)))))))...	ENSG00000180448	protein_coding	no	no	no	novel-mir-candidate-47-5p	1081764	1081788	CAGCGAGGAGGCGGGAGUGGGCCGA	25	0.2	0.2	0.04	0.56	-5	novel-mir-candidate-47-3p	1081797	1081824	GGCCUCCCCACCCCCGGGCUCCCGCAGG	28	0.0714286	0.571429	0.0714286	0.285714	-5
novel-mir-candidate-161	1.9517	chr10	-	26622520	26622588	CAGGCGCCUGCCCGUCCGCAGCCAGUGGGGACUGCGGCGGCUCCCGGGAGGCGGCGGGGCAGGGGCGCG	69	0.0869565	0.347826	0.0724638	0.492754	-41.4	...((.(((((((..((((..((..(((((.(((...))).)))))))..))))..))))))).))...			no	no	yes	novel-mir-candidate-161-5p	26622570	26622588	CAGGCGCCUGCCCGUCCGC	19	0.0526316	0.526316	0.105263	0.315789	-3.6	novel-mir-candidate-161-3p	26622520	26622542	GGAGGCGGCGGGGCAGGGGCGCG	23	0.0869565	0.217391	0	0.695652	-3.2
novel-mir-candidate-82	1.967	chr2	+	12717291	12717365	CGCCGCGCGUUGGAAGGGCCAGGGACGCAGCUCCCCUUGCAGCGCCCGCAGGACCCCCGCAAGCUCGUGCCGGCG	75	0.133333	0.413333	0.0933333	0.36	-33.5	((((((((((((...(((((.(((.(((.((.......)).))))))...)).)))...)))...)))).)))))	ENSG00000071575	protein_coding	yes	yes	no	novel-mir-candidate-82-5p	12717291	12717314	CGCCGCGCGUUGGAAGGGCCAGGG	24	0.125	0.291667	0.0833333	0.5	-3.5	novel-mir-candidate-82-3p	12717346	12717365	CCCGCAAGCUCGUGCCGGCG	20	0.1	0.45	0.1	0.35	-5.8
novel-mir-candidate-363	1.9872	chr21	-	41168711	41168791	CCUCAGUGCGCCCCGGGCGGGGGCUGCCGUCCUCCGCGACUCAAGAGCGAGCGCCCCCGCUCCCCGGCCCACCCGAGCCCC	81	0.0987654	0.506173	0.0864198	0.308642	-37.9	.(((.(((.(((..((((((((((.(((((.((..........)).))).)))))))))).))..))).)))..)))....	ENSG00000182240	protein_coding	yes	no	no	novel-mir-candidate-363-5p	41168772	41168791	CCUCAGUGCGCCCCGGGCGG	20	0.05	0.45	0.1	0.4	-5.1	novel-mir-candidate-363-3p	41168711	41168729	CCCGGCCCACCCGAGCCCC	19	0.105263	0.684211	0	0.210526	-3.3
novel-mir-candidate-140	1.9923	chr15	+	90994186	90994227	GGCCGCCGGCGGACAGCGCGUCAGGUCUCACCGCCGCGGCCC	42	0.0952381	0.452381	0.0714286	0.380952	-24.5	((((((.(((((..((.((.....))))..))))))))))).	ENSG00000198901	protein_coding	yes	no	no	novel-mir-candidate-140-5p	90994186	90994204	GGCCGCCGGCGGACAGCGC	19	0.105263	0.421053	0	0.473684	-2.9	novel-mir-candidate-140-3p	90994208	90994227	AGGUCUCACCGCCGCGGCCC	20	0.1	0.5	0.1	0.3	-3.2
novel-mir-candidate-239	1.9985	chr1	+	201888876	201888954	GGCGGAAGAGGAGCCCGAGCCUGGCCGCGGGCUGGGCCCCGCCGCAGCUCCAGCUGGCCGGCUUGGUCCUGCGGUCCCU	79	0.0886076	0.379747	0.126582	0.405063	-43.7	...(((..((((..(((((((.(((((((((((((((...))).)))).)).)).)))))))))))))))....)))..	ENSG00000198892	protein_coding	yes	yes	no	novel-mir-candidate-239-5p	201888876	201888898	GGCGGAAGAGGAGCCCGAGCCUG	23	0.217391	0.26087	0.0434783	0.478261	-3.8	novel-mir-candidate-239-3p	201888929	201888954	CUGGCCGGCUUGGUCCUGCGGUCCCU	26	0	0.384615	0.269231	0.346154	-6.7
novel-mir-candidate-289	2.0109	chr13	-	113490611	113490661	UGGCCCGGCGUCGCCUCUGCCCGUCGGGGUCGGGGUCGGGGUCGGGCCCCA	51	0.0196078	0.372549	0.156863	0.45098	-37	.((((((((.(((((((.((((....)))).)))).))).))))))))...	ENSG00000150401	protein_coding	yes	no	no	novel-mir-candidate-289-5p	113490639	113490661	UGGCCCGGCGUCGCCUCUGCCCG	23	0	0.478261	0.173913	0.347826	-6.2	novel-mir-candidate-289-3p	113490611	113490631	CGGGGUCGGGGUCGGGCCCCA	21	0.047619	0.333333	0.0952381	0.52381	-11.8	ppy-miR-1538_MIMAT0016235
novel-mir-candidate-7	2.0172	chr2	+	70086842	70086895	CGGCAGGCGGCCGUGAGUGGGUUUCGGUCUUUCUGCCCACCGGCCGCCGCCGGG	54	0.0555556	0.351852	0.185185	0.407407	-34.9	((((.((((((((...((((((............))))))))))))))))))..	ENSG00000179818	processed_transcript	yes	no	no	novel-mir-candidate-7-5p	70086842	70086860	CGGCAGGCGGCCGUGAGUG	19	0.105263	0.263158	0.105263	0.526316	-5.4	novel-mir-candidate-7-3p	70086877	70086895	CCCACCGGCCGCCGCCGGG	19	0.0526316	0.578947	0	0.368421	-9.5
novel-mir-candidate-116	2.0215	chr19	-	3029312	3029382	GCGGGCGCGGGGAGGGGCGGUGCGCGGGGGUGGGCGCGGGGCGGGCCGCGGGCGCGUGGGGGCGGCGGCGC	71	0.0140845	0.253521	0.0422535	0.690141	-31.1	(((.((.((.((....((..(((((........)))))..))...)).)).)).)))....(((....)))	ENSG00000065717	protein_coding	yes	no	no	novel-mir-candidate-116-5p	3029364	3029382	GCGGGCGCGGGGAGGGGCG	19	0.0526316	0.210526	0	0.736842	-2.9	novel-mir-candidate-116-3p	3029312	3029331	GCGCGUGGGGGCGGCGGCGC	20	0	0.3	0.05	0.65	-5.4
novel-mir-candidate-237	2.1259	chr19	-	708862	708939	GGCGCGGGGGGUGGGCUGGGCGCGCGCGUCUCCGGCGCGCUCCCCUCUCCCUCCCGCCCGCCCCGCUCCCCGCCCCGC	78	0	0.525641	0.115385	0.358974	-51.2	((.((((((((((((.((((((.(((((((...)))))))..............)))))).)))))))))))).))..	ENSG00000099864	protein_coding	no	no	no	novel-mir-candidate-237-5p	708919	708939	GGCGCGGGGGGUGGGCUGGGC	21	0	0.190476	0.0952381	0.714286	-5.8	novel-mir-candidate-237-3p	708862	708881	CGCCCCGCUCCCCGCCCCGC	20	0	0.75	0.05	0.2	-0.8
novel-mir-candidate-2	2.1293	chr3	-	43286847	43286895	CCGCGCCGCGGGGUCCGGGCCACCGCAGCCCGGGCCCCGCGUCCUCCCG	49	0.0408163	0.530612	0.0612245	0.367347	-33.8	......((((((((((((((.......))))))))))))))........	ENSG00000163788	protein_coding	yes	no	no	novel-mir-candidate-2-5p	43286872	43286895	CCGCGCCGCGGGGUCCGGGCCACC	24	0.0416667	0.5	0.0416667	0.416667	-8.4	novel-mir-candidate-2-3p	43286847	43286867	CCCGGGCCCCGCGUCCUCCCG	21	0	0.619048	0.0952381	0.285714	-4.1
novel-mir-candidate-108	2.147	chr19	-	1011662	1011730	CGCCGGCGCAGGGCGGGGCGGGCGUCCUCCAGGCCCUCACCGGGCGCCCGCCGCCCUGUGCCCGCAGUG	69	0.057971	0.449275	0.0869565	0.405797	-50.6	.((.((((((((((..(((((((((((....((......))))))))))))))))))))))).))....	ENSG00000182087	protein_coding	yes	no	no	novel-mir-candidate-108-5p	1011708	1011730	CGCCGGCGCAGGGCGGGGCGGGC	23	0.0434783	0.347826	0	0.608696	-9.7	novel-mir-candidate-108-3p	1011662	1011687	GCGCCCGCCGCCCUGUGCCCGCAGUG	26	0.0384615	0.5	0.115385	0.346154	-5.8
novel-mir-candidate-175	2.2317	chr2	+	120012825	120012911	ACGGGCGCCUCCUCCGCGGGCGGAGGGCCGCAGCGGGAACUGGGUUUCGGCAGCGCCCCUUUAAACCAGCCGCGGACGCCCGGCUGC	87	0.126437	0.37931	0.114943	0.37931	-46.6	.((((((.....(((((((..((((((.(((.((.(((((...))))).)).))).)))).....))..))))))))))))).....			no	no	yes	novel-mir-candidate-175-5p	120012825	120012845	ACGGGCGCCUCCUCCGCGGGC	21	0.047619	0.47619	0.0952381	0.380952	-3.2	novel-mir-candidate-175-3p	120012892	120012911	AGCCGCGGACGCCCGGCUGC	20	0.1	0.45	0.05	0.4	-8.8
novel-mir-candidate-144	2.2942	chr1	+	89843386	89843467	AGCGGGCGGGCGGGUGGCUGGCAGCGAGGCCACCAGCAGGGGGGGCCCGGGCCGAGGCCGCGCCACCUCGGCACCACGCGGG	82	0.121951	0.353659	0.0365854	0.487805	-40.9	.(((((((((.(((((((((((..((.((((.((......)).)))))).)))..)))))).)).)).))...)).)))...	ENSG00000271949, ENSG00000171492	protein_coding, protein_coding	yes	no	no	novel-mir-candidate-144-5p	89843386	89843404	AGCGGGCGGGCGGGUGGCU	19	0.0526316	0.210526	0.105263	0.631579	-2.6	novel-mir-candidate-144-3p	89843442	89843467	GCCGCGCCACCUCGGCACCACGCGGG	26	0.115385	0.5	0.0384615	0.346154	-9
